# Supplementary material for: Semantic Modeling for Exposomics with Exploratory Evaluation in Clinical Context
Source: J Healthc Eng. 2017 Aug 30;2017:3818302. doi: 10.1155/2017/3818302 (PMC5603127; doi:10.1155/2017/3818302)
Supplement: Supplementary file 1 — Supplement 1. Full set of the exposome semantic types and relations. Supplement 2. Full set of the ontology-identified microbial disorder concepts. Supplement 3. Exposome annotation counts ranked by section and semantic type. [file 3818302.f1.xlsx]

## Sheet: Supp1_exposome_semantic_types.t
DISO semantic type	Relation	EXPO semantic type
Acquired Abnormality	>>associated_with>>	Daily or Recreational Activity
Acquired Abnormality	>>associated_with>>	Diagnostic Procedure
Acquired Abnormality	>>associated_with>>	Geographic Area
Acquired Abnormality	>>associated_with>>	Health Care Activity
Acquired Abnormality	>>associated_with>>	Individual Behavior
Acquired Abnormality	>>associated_with>>	Laboratory Procedure
Acquired Abnormality	>>associated_with>>	Molecular Biology Research Technique
Acquired Abnormality	>>associated_with>>	Occupational Activity
Acquired Abnormality	>>associated_with>>	Therapeutic or Preventive Procedure
Cell or Molecular Dysfunction	>>associated_with>>	Daily or Recreational Activity
Cell or Molecular Dysfunction	>>associated_with>>	Diagnostic Procedure
Cell or Molecular Dysfunction	>>associated_with>>	Geographic Area
Cell or Molecular Dysfunction	>>associated_with>>	Health Care Activity
Cell or Molecular Dysfunction	>>associated_with>>	Individual Behavior
Cell or Molecular Dysfunction	>>associated_with>>	Laboratory Procedure
Cell or Molecular Dysfunction	>>associated_with>>	Molecular Biology Research Technique
Cell or Molecular Dysfunction	>>associated_with>>	Occupational Activity
Cell or Molecular Dysfunction	>>associated_with>>	Therapeutic or Preventive Procedure
Congenital Abnormality	>>associated_with>>	Daily or Recreational Activity
Congenital Abnormality	>>associated_with>>	Diagnostic Procedure
Congenital Abnormality	>>associated_with>>	Geographic Area
Congenital Abnormality	>>associated_with>>	Health Care Activity
Congenital Abnormality	>>associated_with>>	Individual Behavior
Congenital Abnormality	>>associated_with>>	Laboratory Procedure
Congenital Abnormality	>>associated_with>>	Molecular Biology Research Technique
Congenital Abnormality	>>associated_with>>	Occupational Activity
Congenital Abnormality	>>associated_with>>	Therapeutic or Preventive Procedure
Disease or Syndrome	>>associated_with>>	Daily or Recreational Activity
Disease or Syndrome	>>associated_with>>	Diagnostic Procedure
Disease or Syndrome	>>associated_with>>	Geographic Area
Disease or Syndrome	>>associated_with>>	Health Care Activity
Disease or Syndrome	>>associated_with>>	Individual Behavior
Disease or Syndrome	>>associated_with>>	Laboratory Procedure
Disease or Syndrome	>>associated_with>>	Molecular Biology Research Technique
Disease or Syndrome	>>associated_with>>	Occupational Activity
Disease or Syndrome	>>associated_with>>	Therapeutic or Preventive Procedure
Injury or Poisoning	>>associated_with>>	Daily or Recreational Activity
Injury or Poisoning	>>associated_with>>	Diagnostic Procedure
Injury or Poisoning	>>associated_with>>	Geographic Area
Injury or Poisoning	>>associated_with>>	Health Care Activity
Injury or Poisoning	>>associated_with>>	Individual Behavior
Injury or Poisoning	>>associated_with>>	Laboratory Procedure
Injury or Poisoning	>>associated_with>>	Molecular Biology Research Technique
Injury or Poisoning	>>associated_with>>	Occupational Activity
Injury or Poisoning	>>associated_with>>	Therapeutic or Preventive Procedure
Mental or Behavioral Dysfunction	>>associated_with>>	Daily or Recreational Activity
Mental or Behavioral Dysfunction	>>associated_with>>	Diagnostic Procedure
Mental or Behavioral Dysfunction	>>associated_with>>	Geographic Area
Mental or Behavioral Dysfunction	>>associated_with>>	Health Care Activity
Mental or Behavioral Dysfunction	>>associated_with>>	Individual Behavior
Mental or Behavioral Dysfunction	>>associated_with>>	Laboratory Procedure
Mental or Behavioral Dysfunction	>>associated_with>>	Molecular Biology Research Technique
Mental or Behavioral Dysfunction	>>associated_with>>	Occupational Activity
Mental or Behavioral Dysfunction	>>associated_with>>	Therapeutic or Preventive Procedure
Pathologic Function	>>associated_with>>	Daily or Recreational Activity
Pathologic Function	>>associated_with>>	Diagnostic Procedure
Pathologic Function	>>associated_with>>	Geographic Area
Pathologic Function	>>associated_with>>	Health Care Activity
Pathologic Function	>>associated_with>>	Individual Behavior
Pathologic Function	>>associated_with>>	Laboratory Procedure
Pathologic Function	>>associated_with>>	Molecular Biology Research Technique
Pathologic Function	>>associated_with>>	Occupational Activity
Pathologic Function	>>associated_with>>	Therapeutic or Preventive Procedure
Acquired Abnormality	<<causes<<	Amino Acid, Peptide, or Protein
Anatomical Abnormality	<<causes<<	Amino Acid, Peptide, or Protein
Cell or Molecular Dysfunction	<<causes<<	Amino Acid, Peptide, or Protein
Congenital Abnormality	<<causes<<	Amino Acid, Peptide, or Protein
Disease or Syndrome	<<causes<<	Amino Acid, Peptide, or Protein
Injury or Poisoning	<<causes<<	Amino Acid, Peptide, or Protein
Mental or Behavioral Dysfunction	<<causes<<	Amino Acid, Peptide, or Protein
Neoplastic Process	<<causes<<	Amino Acid, Peptide, or Protein
Pathologic Function	<<causes<<	Amino Acid, Peptide, or Protein
Acquired Abnormality	<<causes<<	Antibiotic
Anatomical Abnormality	<<causes<<	Antibiotic
Cell or Molecular Dysfunction	<<causes<<	Antibiotic
Congenital Abnormality	<<causes<<	Antibiotic
Disease or Syndrome	<<causes<<	Antibiotic
Injury or Poisoning	<<causes<<	Antibiotic
Mental or Behavioral Dysfunction	<<causes<<	Antibiotic
Neoplastic Process	<<causes<<	Antibiotic
Pathologic Function	<<causes<<	Antibiotic
Cell or Molecular Dysfunction	<<causes<<	Bacterium
Disease or Syndrome	<<causes<<	Bacterium
Mental or Behavioral Dysfunction	<<causes<<	Bacterium
Neoplastic Process	<<causes<<	Bacterium
Pathologic Function	<<causes<<	Bacterium
Acquired Abnormality	<<causes<<	Biologically Active Substance
Anatomical Abnormality	<<causes<<	Biologically Active Substance
Cell or Molecular Dysfunction	<<causes<<	Biologically Active Substance
Congenital Abnormality	<<causes<<	Biologically Active Substance
Disease or Syndrome	<<causes<<	Biologically Active Substance
Injury or Poisoning	<<causes<<	Biologically Active Substance
Mental or Behavioral Dysfunction	<<causes<<	Biologically Active Substance
Neoplastic Process	<<causes<<	Biologically Active Substance
Pathologic Function	<<causes<<	Biologically Active Substance
Acquired Abnormality	<<causes<<	Biomedical or Dental Material
Anatomical Abnormality	<<causes<<	Biomedical or Dental Material
Cell or Molecular Dysfunction	<<causes<<	Biomedical or Dental Material
Congenital Abnormality	<<causes<<	Biomedical or Dental Material
Disease or Syndrome	<<causes<<	Biomedical or Dental Material
Injury or Poisoning	<<causes<<	Biomedical or Dental Material
Mental or Behavioral Dysfunction	<<causes<<	Biomedical or Dental Material
Neoplastic Process	<<causes<<	Biomedical or Dental Material
Pathologic Function	<<causes<<	Biomedical or Dental Material
Acquired Abnormality	<<causes<<	Chemical
Anatomical Abnormality	<<causes<<	Chemical
Cell or Molecular Dysfunction	<<causes<<	Chemical
Congenital Abnormality	<<causes<<	Chemical
Disease or Syndrome	<<causes<<	Chemical
Injury or Poisoning	<<causes<<	Chemical
Mental or Behavioral Dysfunction	<<causes<<	Chemical
Neoplastic Process	<<causes<<	Chemical
Pathologic Function	<<causes<<	Chemical
Acquired Abnormality	<<causes<<	Chemical Viewed Functionally
Anatomical Abnormality	<<causes<<	Chemical Viewed Functionally
Cell or Molecular Dysfunction	<<causes<<	Chemical Viewed Functionally
Congenital Abnormality	<<causes<<	Chemical Viewed Functionally
Disease or Syndrome	<<causes<<	Chemical Viewed Functionally
Injury or Poisoning	<<causes<<	Chemical Viewed Functionally
Mental or Behavioral Dysfunction	<<causes<<	Chemical Viewed Functionally
Neoplastic Process	<<causes<<	Chemical Viewed Functionally
Pathologic Function	<<causes<<	Chemical Viewed Functionally
Acquired Abnormality	<<causes<<	Clinical Drug
Anatomical Abnormality	<<causes<<	Clinical Drug
Cell or Molecular Dysfunction	<<causes<<	Clinical Drug
Congenital Abnormality	<<causes<<	Clinical Drug
Disease or Syndrome	<<causes<<	Clinical Drug
Injury or Poisoning	<<causes<<	Clinical Drug
Mental or Behavioral Dysfunction	<<causes<<	Clinical Drug
Neoplastic Process	<<causes<<	Clinical Drug
Pathologic Function	<<causes<<	Clinical Drug
Acquired Abnormality	<<causes<<	Drug Delivery Device
Anatomical Abnormality	<<causes<<	Drug Delivery Device
Cell or Molecular Dysfunction	<<causes<<	Drug Delivery Device
Congenital Abnormality	<<causes<<	Drug Delivery Device
Disease or Syndrome	<<causes<<	Drug Delivery Device
Injury or Poisoning	<<causes<<	Drug Delivery Device
Mental or Behavioral Dysfunction	<<causes<<	Drug Delivery Device
Neoplastic Process	<<causes<<	Drug Delivery Device
Pathologic Function	<<causes<<	Drug Delivery Device
Acquired Abnormality	<<causes<<	Element, Ion, or Isotope
Anatomical Abnormality	<<causes<<	Element, Ion, or Isotope
Cell or Molecular Dysfunction	<<causes<<	Element, Ion, or Isotope
Congenital Abnormality	<<causes<<	Element, Ion, or Isotope
Disease or Syndrome	<<causes<<	Element, Ion, or Isotope
Injury or Poisoning	<<causes<<	Element, Ion, or Isotope
Mental or Behavioral Dysfunction	<<causes<<	Element, Ion, or Isotope
Neoplastic Process	<<causes<<	Element, Ion, or Isotope
Pathologic Function	<<causes<<	Element, Ion, or Isotope
Acquired Abnormality	<<causes<<	Enzyme
Anatomical Abnormality	<<causes<<	Enzyme
Cell or Molecular Dysfunction	<<causes<<	Enzyme
Congenital Abnormality	<<causes<<	Enzyme
Disease or Syndrome	<<causes<<	Enzyme
Injury or Poisoning	<<causes<<	Enzyme
Mental or Behavioral Dysfunction	<<causes<<	Enzyme
Neoplastic Process	<<causes<<	Enzyme
Pathologic Function	<<causes<<	Enzyme
Acquired Abnormality	<<causes<<	Food
Anatomical Abnormality	<<causes<<	Food
Cell or Molecular Dysfunction	<<causes<<	Food
Congenital Abnormality	<<causes<<	Food
Disease or Syndrome	<<causes<<	Food
Injury or Poisoning	<<causes<<	Food
Mental or Behavioral Dysfunction	<<causes<<	Food
Neoplastic Process	<<causes<<	Food
Pathologic Function	<<causes<<	Food
Cell or Molecular Dysfunction	<<causes<<	Fungus
Disease or Syndrome	<<causes<<	Fungus
Mental or Behavioral Dysfunction	<<causes<<	Fungus
Neoplastic Process	<<causes<<	Fungus
Pathologic Function	<<causes<<	Fungus
Acquired Abnormality	<<causes<<	Hazardous or Poisonous Substance
Anatomical Abnormality	<<causes<<	Hazardous or Poisonous Substance
Cell or Molecular Dysfunction	<<causes<<	Hazardous or Poisonous Substance
Congenital Abnormality	<<causes<<	Hazardous or Poisonous Substance
Disease or Syndrome	<<causes<<	Hazardous or Poisonous Substance
Injury or Poisoning	<<causes<<	Hazardous or Poisonous Substance
Mental or Behavioral Dysfunction	<<causes<<	Hazardous or Poisonous Substance
Neoplastic Process	<<causes<<	Hazardous or Poisonous Substance
Pathologic Function	<<causes<<	Hazardous or Poisonous Substance
Acquired Abnormality	<<causes<<	Hormone
Anatomical Abnormality	<<causes<<	Hormone
Cell or Molecular Dysfunction	<<causes<<	Hormone
Congenital Abnormality	<<causes<<	Hormone
Disease or Syndrome	<<causes<<	Hormone
Injury or Poisoning	<<causes<<	Hormone
Mental or Behavioral Dysfunction	<<causes<<	Hormone
Neoplastic Process	<<causes<<	Hormone
Pathologic Function	<<causes<<	Hormone
Acquired Abnormality	<<causes<<	Immunologic Factor
Anatomical Abnormality	<<causes<<	Immunologic Factor
Cell or Molecular Dysfunction	<<causes<<	Immunologic Factor
Congenital Abnormality	<<causes<<	Immunologic Factor
Disease or Syndrome	<<causes<<	Immunologic Factor
Injury or Poisoning	<<causes<<	Immunologic Factor
Mental or Behavioral Dysfunction	<<causes<<	Immunologic Factor
Neoplastic Process	<<causes<<	Immunologic Factor
Pathologic Function	<<causes<<	Immunologic Factor
Acquired Abnormality	<<causes<<	Indicator, Reagent, or Diagnostic Aid
Anatomical Abnormality	<<causes<<	Indicator, Reagent, or Diagnostic Aid
Cell or Molecular Dysfunction	<<causes<<	Indicator, Reagent, or Diagnostic Aid
Congenital Abnormality	<<causes<<	Indicator, Reagent, or Diagnostic Aid
Disease or Syndrome	<<causes<<	Indicator, Reagent, or Diagnostic Aid
Injury or Poisoning	<<causes<<	Indicator, Reagent, or Diagnostic Aid
Mental or Behavioral Dysfunction	<<causes<<	Indicator, Reagent, or Diagnostic Aid
Neoplastic Process	<<causes<<	Indicator, Reagent, or Diagnostic Aid
Pathologic Function	<<causes<<	Indicator, Reagent, or Diagnostic Aid
Acquired Abnormality	<<causes<<	Inorganic Chemical
Anatomical Abnormality	<<causes<<	Inorganic Chemical
Cell or Molecular Dysfunction	<<causes<<	Inorganic Chemical
Congenital Abnormality	<<causes<<	Inorganic Chemical
Disease or Syndrome	<<causes<<	Inorganic Chemical
Injury or Poisoning	<<causes<<	Inorganic Chemical
Mental or Behavioral Dysfunction	<<causes<<	Inorganic Chemical
Neoplastic Process	<<causes<<	Inorganic Chemical
Pathologic Function	<<causes<<	Inorganic Chemical
Acquired Abnormality	<<causes<<	Manufactured Object
Anatomical Abnormality	<<causes<<	Manufactured Object
Cell or Molecular Dysfunction	<<causes<<	Manufactured Object
Congenital Abnormality	<<causes<<	Manufactured Object
Disease or Syndrome	<<causes<<	Manufactured Object
Injury or Poisoning	<<causes<<	Manufactured Object
Mental or Behavioral Dysfunction	<<causes<<	Manufactured Object
Neoplastic Process	<<causes<<	Manufactured Object
Pathologic Function	<<causes<<	Manufactured Object
Acquired Abnormality	<<causes<<	Medical Device
Anatomical Abnormality	<<causes<<	Medical Device
Cell or Molecular Dysfunction	<<causes<<	Medical Device
Congenital Abnormality	<<causes<<	Medical Device
Disease or Syndrome	<<causes<<	Medical Device
Injury or Poisoning	<<causes<<	Medical Device
Mental or Behavioral Dysfunction	<<causes<<	Medical Device
Neoplastic Process	<<causes<<	Medical Device
Pathologic Function	<<causes<<	Medical Device
Acquired Abnormality	<<causes<<	Nucleic Acid, Nucleoside, or Nucleotide
Anatomical Abnormality	<<causes<<	Nucleic Acid, Nucleoside, or Nucleotide
Cell or Molecular Dysfunction	<<causes<<	Nucleic Acid, Nucleoside, or Nucleotide
Congenital Abnormality	<<causes<<	Nucleic Acid, Nucleoside, or Nucleotide
Disease or Syndrome	<<causes<<	Nucleic Acid, Nucleoside, or Nucleotide
Injury or Poisoning	<<causes<<	Nucleic Acid, Nucleoside, or Nucleotide
Mental or Behavioral Dysfunction	<<causes<<	Nucleic Acid, Nucleoside, or Nucleotide
Neoplastic Process	<<causes<<	Nucleic Acid, Nucleoside, or Nucleotide
Pathologic Function	<<causes<<	Nucleic Acid, Nucleoside, or Nucleotide
Acquired Abnormality	<<causes<<	Organic Chemical
Anatomical Abnormality	<<causes<<	Organic Chemical
Cell or Molecular Dysfunction	<<causes<<	Organic Chemical
Congenital Abnormality	<<causes<<	Organic Chemical
Disease or Syndrome	<<causes<<	Organic Chemical
Injury or Poisoning	<<causes<<	Organic Chemical
Mental or Behavioral Dysfunction	<<causes<<	Organic Chemical
Neoplastic Process	<<causes<<	Organic Chemical
Pathologic Function	<<causes<<	Organic Chemical
Acquired Abnormality	<<causes<<	Pharmacologic Substance
Anatomical Abnormality	<<causes<<	Pharmacologic Substance
Cell or Molecular Dysfunction	<<causes<<	Pharmacologic Substance
Congenital Abnormality	<<causes<<	Pharmacologic Substance
Disease or Syndrome	<<causes<<	Pharmacologic Substance
Injury or Poisoning	<<causes<<	Pharmacologic Substance
Mental or Behavioral Dysfunction	<<causes<<	Pharmacologic Substance
Neoplastic Process	<<causes<<	Pharmacologic Substance
Pathologic Function	<<causes<<	Pharmacologic Substance
Acquired Abnormality	<<causes<<	Research Device
Anatomical Abnormality	<<causes<<	Research Device
Cell or Molecular Dysfunction	<<causes<<	Research Device
Congenital Abnormality	<<causes<<	Research Device
Disease or Syndrome	<<causes<<	Research Device
Injury or Poisoning	<<causes<<	Research Device
Mental or Behavioral Dysfunction	<<causes<<	Research Device
Neoplastic Process	<<causes<<	Research Device
Pathologic Function	<<causes<<	Research Device
Acquired Abnormality	<<causes<<	Substance
Anatomical Abnormality	<<causes<<	Substance
Cell or Molecular Dysfunction	<<causes<<	Substance
Congenital Abnormality	<<causes<<	Substance
Disease or Syndrome	<<causes<<	Substance
Injury or Poisoning	<<causes<<	Substance
Mental or Behavioral Dysfunction	<<causes<<	Substance
Neoplastic Process	<<causes<<	Substance
Pathologic Function	<<causes<<	Substance
Cell or Molecular Dysfunction	<<causes<<	Virus
Disease or Syndrome	<<causes<<	Virus
Mental or Behavioral Dysfunction	<<causes<<	Virus
Neoplastic Process	<<causes<<	Virus
Pathologic Function	<<causes<<	Virus
Acquired Abnormality	<<causes<<	Vitamin
Anatomical Abnormality	<<causes<<	Vitamin
Cell or Molecular Dysfunction	<<causes<<	Vitamin
Congenital Abnormality	<<causes<<	Vitamin
Disease or Syndrome	<<causes<<	Vitamin
Injury or Poisoning	<<causes<<	Vitamin
Mental or Behavioral Dysfunction	<<causes<<	Vitamin
Neoplastic Process	<<causes<<	Vitamin
Pathologic Function	<<causes<<	Vitamin
Acquired Abnormality	<<complicates<<	Antibiotic
Anatomical Abnormality	<<complicates<<	Antibiotic
Cell or Molecular Dysfunction	<<complicates<<	Antibiotic
Congenital Abnormality	<<complicates<<	Antibiotic
Disease or Syndrome	<<complicates<<	Antibiotic
Injury or Poisoning	<<complicates<<	Antibiotic
Mental or Behavioral Dysfunction	<<complicates<<	Antibiotic
Neoplastic Process	<<complicates<<	Antibiotic
Pathologic Function	<<complicates<<	Antibiotic
Acquired Abnormality	<<complicates<<	Biologically Active Substance
Anatomical Abnormality	<<complicates<<	Biologically Active Substance
Cell or Molecular Dysfunction	<<complicates<<	Biologically Active Substance
Congenital Abnormality	<<complicates<<	Biologically Active Substance
Disease or Syndrome	<<complicates<<	Biologically Active Substance
Injury or Poisoning	<<complicates<<	Biologically Active Substance
Mental or Behavioral Dysfunction	<<complicates<<	Biologically Active Substance
Neoplastic Process	<<complicates<<	Biologically Active Substance
Pathologic Function	<<complicates<<	Biologically Active Substance
Acquired Abnormality	<<complicates<<	Enzyme
Anatomical Abnormality	<<complicates<<	Enzyme
Cell or Molecular Dysfunction	<<complicates<<	Enzyme
Congenital Abnormality	<<complicates<<	Enzyme
Disease or Syndrome	<<complicates<<	Enzyme
Injury or Poisoning	<<complicates<<	Enzyme
Mental or Behavioral Dysfunction	<<complicates<<	Enzyme
Neoplastic Process	<<complicates<<	Enzyme
Pathologic Function	<<complicates<<	Enzyme
Acquired Abnormality	<<complicates<<	Hazardous or Poisonous Substance
Anatomical Abnormality	<<complicates<<	Hazardous or Poisonous Substance
Cell or Molecular Dysfunction	<<complicates<<	Hazardous or Poisonous Substance
Congenital Abnormality	<<complicates<<	Hazardous or Poisonous Substance
Disease or Syndrome	<<complicates<<	Hazardous or Poisonous Substance
Injury or Poisoning	<<complicates<<	Hazardous or Poisonous Substance
Mental or Behavioral Dysfunction	<<complicates<<	Hazardous or Poisonous Substance
Neoplastic Process	<<complicates<<	Hazardous or Poisonous Substance
Pathologic Function	<<complicates<<	Hazardous or Poisonous Substance
Acquired Abnormality	<<complicates<<	Hormone
Anatomical Abnormality	<<complicates<<	Hormone
Cell or Molecular Dysfunction	<<complicates<<	Hormone
Congenital Abnormality	<<complicates<<	Hormone
Disease or Syndrome	<<complicates<<	Hormone
Injury or Poisoning	<<complicates<<	Hormone
Mental or Behavioral Dysfunction	<<complicates<<	Hormone
Neoplastic Process	<<complicates<<	Hormone
Pathologic Function	<<complicates<<	Hormone
Acquired Abnormality	<<complicates<<	Immunologic Factor
Anatomical Abnormality	<<complicates<<	Immunologic Factor
Cell or Molecular Dysfunction	<<complicates<<	Immunologic Factor
Congenital Abnormality	<<complicates<<	Immunologic Factor
Disease or Syndrome	<<complicates<<	Immunologic Factor
Injury or Poisoning	<<complicates<<	Immunologic Factor
Mental or Behavioral Dysfunction	<<complicates<<	Immunologic Factor
Neoplastic Process	<<complicates<<	Immunologic Factor
Pathologic Function	<<complicates<<	Immunologic Factor
Acquired Abnormality	<<complicates<<	Pharmacologic Substance
Anatomical Abnormality	<<complicates<<	Pharmacologic Substance
Cell or Molecular Dysfunction	<<complicates<<	Pharmacologic Substance
Congenital Abnormality	<<complicates<<	Pharmacologic Substance
Disease or Syndrome	<<complicates<<	Pharmacologic Substance
Injury or Poisoning	<<complicates<<	Pharmacologic Substance
Mental or Behavioral Dysfunction	<<complicates<<	Pharmacologic Substance
Neoplastic Process	<<complicates<<	Pharmacologic Substance
Pathologic Function	<<complicates<<	Pharmacologic Substance
Cell or Molecular Dysfunction	<<complicates<<	Therapeutic or Preventive Procedure
Disease or Syndrome	<<complicates<<	Therapeutic or Preventive Procedure
Mental or Behavioral Dysfunction	<<complicates<<	Therapeutic or Preventive Procedure
Neoplastic Process	<<complicates<<	Therapeutic or Preventive Procedure
Pathologic Function	<<complicates<<	Therapeutic or Preventive Procedure
Acquired Abnormality	<<complicates<<	Vitamin
Anatomical Abnormality	<<complicates<<	Vitamin
Cell or Molecular Dysfunction	<<complicates<<	Vitamin
Congenital Abnormality	<<complicates<<	Vitamin
Disease or Syndrome	<<complicates<<	Vitamin
Injury or Poisoning	<<complicates<<	Vitamin
Mental or Behavioral Dysfunction	<<complicates<<	Vitamin
Neoplastic Process	<<complicates<<	Vitamin
Pathologic Function	<<complicates<<	Vitamin
Acquired Abnormality	>>result_of>>	Behavior
Acquired Abnormality	>>result_of>>	Diagnostic Procedure
Acquired Abnormality	>>result_of>>	Environmental Effect of Humans
Acquired Abnormality	>>result_of>>	Health Care Activity
Acquired Abnormality	>>result_of>>	Human-caused Phenomenon or Process
Acquired Abnormality	>>result_of>>	Individual Behavior
Acquired Abnormality	>>result_of>>	Laboratory Procedure
Acquired Abnormality	>>result_of>>	Natural Phenomenon or Process
Acquired Abnormality	>>result_of>>	Social Behavior
Acquired Abnormality	>>result_of>>	Therapeutic or Preventive Procedure
Anatomical Abnormality	>>result_of>>	Diagnostic Procedure
Anatomical Abnormality	>>result_of>>	Environmental Effect of Humans
Anatomical Abnormality	>>result_of>>	Health Care Activity
Anatomical Abnormality	>>result_of>>	Human-caused Phenomenon or Process
Anatomical Abnormality	>>result_of>>	Laboratory Procedure
Anatomical Abnormality	>>result_of>>	Natural Phenomenon or Process
Anatomical Abnormality	>>result_of>>	Therapeutic or Preventive Procedure
Cell or Molecular Dysfunction	>>result_of>>	Behavior
Cell or Molecular Dysfunction	>>result_of>>	Diagnostic Procedure
Cell or Molecular Dysfunction	>>result_of>>	Environmental Effect of Humans
Cell or Molecular Dysfunction	>>result_of>>	Health Care Activity
Cell or Molecular Dysfunction	>>result_of>>	Human-caused Phenomenon or Process
Cell or Molecular Dysfunction	>>result_of>>	Individual Behavior
Cell or Molecular Dysfunction	>>result_of>>	Laboratory Procedure
Cell or Molecular Dysfunction	>>result_of>>	Natural Phenomenon or Process
Cell or Molecular Dysfunction	>>result_of>>	Social Behavior
Cell or Molecular Dysfunction	>>result_of>>	Therapeutic or Preventive Procedure
Congenital Abnormality	>>result_of>>	Diagnostic Procedure
Congenital Abnormality	>>result_of>>	Environmental Effect of Humans
Congenital Abnormality	>>result_of>>	Health Care Activity
Congenital Abnormality	>>result_of>>	Human-caused Phenomenon or Process
Congenital Abnormality	>>result_of>>	Laboratory Procedure
Congenital Abnormality	>>result_of>>	Natural Phenomenon or Process
Congenital Abnormality	>>result_of>>	Therapeutic or Preventive Procedure
Disease or Syndrome	>>result_of>>	Behavior
Disease or Syndrome	>>result_of>>	Diagnostic Procedure
Disease or Syndrome	>>result_of>>	Environmental Effect of Humans
Disease or Syndrome	>>result_of>>	Health Care Activity
Disease or Syndrome	>>result_of>>	Human-caused Phenomenon or Process
Disease or Syndrome	>>result_of>>	Individual Behavior
Disease or Syndrome	>>result_of>>	Laboratory Procedure
Disease or Syndrome	>>result_of>>	Natural Phenomenon or Process
Disease or Syndrome	>>result_of>>	Social Behavior
Disease or Syndrome	>>result_of>>	Therapeutic or Preventive Procedure
Injury or Poisoning	>>result_of>>	Behavior
Injury or Poisoning	>>result_of>>	Diagnostic Procedure
Injury or Poisoning	>>result_of>>	Environmental Effect of Humans
Injury or Poisoning	>>result_of>>	Health Care Activity
Injury or Poisoning	>>result_of>>	Human-caused Phenomenon or Process
Injury or Poisoning	>>result_of>>	Individual Behavior
Injury or Poisoning	>>result_of>>	Laboratory Procedure
Injury or Poisoning	>>result_of>>	Natural Phenomenon or Process
Injury or Poisoning	>>result_of>>	Social Behavior
Injury or Poisoning	>>result_of>>	Therapeutic or Preventive Procedure
Mental or Behavioral Dysfunction	>>result_of>>	Behavior
Mental or Behavioral Dysfunction	>>result_of>>	Diagnostic Procedure
Mental or Behavioral Dysfunction	>>result_of>>	Environmental Effect of Humans
Mental or Behavioral Dysfunction	>>result_of>>	Health Care Activity
Mental or Behavioral Dysfunction	>>result_of>>	Human-caused Phenomenon or Process
Mental or Behavioral Dysfunction	>>result_of>>	Individual Behavior
Mental or Behavioral Dysfunction	>>result_of>>	Laboratory Procedure
Mental or Behavioral Dysfunction	>>result_of>>	Natural Phenomenon or Process
Mental or Behavioral Dysfunction	>>result_of>>	Social Behavior
Mental or Behavioral Dysfunction	>>result_of>>	Therapeutic or Preventive Procedure
Neoplastic Process	>>result_of>>	Diagnostic Procedure
Neoplastic Process	>>result_of>>	Environmental Effect of Humans
Neoplastic Process	>>result_of>>	Health Care Activity
Neoplastic Process	>>result_of>>	Human-caused Phenomenon or Process
Neoplastic Process	>>result_of>>	Individual Behavior
Neoplastic Process	>>result_of>>	Laboratory Procedure
Neoplastic Process	>>result_of>>	Natural Phenomenon or Process
Neoplastic Process	>>result_of>>	Social Behavior
Neoplastic Process	>>result_of>>	Therapeutic or Preventive Procedure
Pathologic Function	>>result_of>>	Behavior
Pathologic Function	>>result_of>>	Diagnostic Procedure
Pathologic Function	>>result_of>>	Environmental Effect of Humans
Pathologic Function	>>result_of>>	Health Care Activity
Pathologic Function	>>result_of>>	Human-caused Phenomenon or Process
Pathologic Function	>>result_of>>	Individual Behavior
Pathologic Function	>>result_of>>	Laboratory Procedure
Pathologic Function	>>result_of>>	Natural Phenomenon or Process
Pathologic Function	>>result_of>>	Social Behavior
Pathologic Function	>>result_of>>	Therapeutic or Preventive Procedure
