# Supplementary material for: Semantic Modeling for Exposomics with Exploratory Evaluation in Clinical Context
Source: J Healthc Eng. 2017 Aug 30;2017:3818302. doi: 10.1155/2017/3818302 (PMC5603127; doi:10.1155/2017/3818302)
Supplement: Supplementary file 2 [file 3818302.f2.xlsx]

## Sheet: Supp2_microbial_disorders.tsv
Disorder CUI	Disorder TUI	Disorder semantic type	Microbe CUI	Microbe TUI	Microbe semantic type
C0000833	T047	Disease or Syndrome	C0004611	T007	Bacterium
C0001142	T047	Disease or Syndrome	C0011635	T004	Fungus
C0001142	T047	Disease or Syndrome	C0016832	T004	Fungus
C0001142	T047	Disease or Syndrome	C0320120	T004	Fungus
C0001142	T047	Disease or Syndrome	C0391965	T004	Fungus
C0001145	T047	Disease or Syndrome	C0004611	T007	Bacterium
C0001175	T047	Disease or Syndrome	C0019682	T005	Virus
C0001249	T047	Disease or Syndrome	C0001248	T007	Bacterium
C0001249	T047	Disease or Syndrome	C0314752	T007	Bacterium
C0001261	T047	Disease or Syndrome	C0001250	T007	Bacterium
C0001261	T047	Disease or Syndrome	C0600148	T007	Bacterium
C0001263	T047	Disease or Syndrome	C0001250	T007	Bacterium
C0001263	T047	Disease or Syndrome	C0600148	T007	Bacterium
C0001264	T047	Disease or Syndrome	C0001250	T007	Bacterium
C0001264	T047	Disease or Syndrome	C0600148	T007	Bacterium
C0001305	T047	Disease or Syndrome	C0001490	T005	Virus
C0001338	T047	Disease or Syndrome	C0019369	T005	Virus
C0001338	T047	Disease or Syndrome	C0042776	T005	Virus
C0001338	T047	Disease or Syndrome	C0319231	T005	Virus
C0001338	T047	Disease or Syndrome	C0319232	T005	Virus
C0001486	T047	Disease or Syndrome	C0001483	T005	Virus
C0001748	T047	Disease or Syndrome	C0001749	T005	Virus
C0001752	T047	Disease or Syndrome	C0001753	T005	Virus
C0001849	T047	Disease or Syndrome	C0019682	T005	Virus
C0001857	T047	Disease or Syndrome	C0019682	T005	Virus
C0001906	T047	Disease or Syndrome	C0032868	T005	Virus
C0001906	T047	Disease or Syndrome	C0037356	T005	Virus
C0001906	T047	Disease or Syndrome	C0042776	T005	Virus
C0001906	T047	Disease or Syndrome	C0729757	T005	Virus
C0002016	T047	Disease or Syndrome	C0002017	T005	Virus
C0002016	T047	Disease or Syndrome	C0042776	T005	Virus
C0002016	T047	Disease or Syndrome	C0086776	T005	Virus
C0002181	T047	Disease or Syndrome	C0004611	T007	Bacterium
C0002181	T047	Disease or Syndrome	C0040840	T007	Bacterium
C0002797	T047	Disease or Syndrome	C0002794	T007	Bacterium
C0002797	T047	Disease or Syndrome	C0018150	T007	Bacterium
C0002797	T047	Disease or Syndrome	C0035583	T007	Bacterium
C0002797	T047	Disease or Syndrome	C0035596	T007	Bacterium
C0002797	T047	Disease or Syndrome	C0314752	T007	Bacterium
C0003175	T047	Disease or Syndrome	C0004589	T007	Bacterium
C0003177	T047	Disease or Syndrome	C0004589	T007	Bacterium
C0003511	T047	Disease or Syndrome	C0004611	T007	Bacterium
C0003511	T047	Disease or Syndrome	C0040840	T007	Bacterium
C0003721	T047	Disease or Syndrome	C0003725	T005	Virus
C0003721	T047	Disease or Syndrome	C0042776	T005	Virus
C0003723	T047	Disease or Syndrome	C0003725	T005	Virus
C0003723	T047	Disease or Syndrome	C0042776	T005	Virus
C0003756	T047	Disease or Syndrome	C0206497	T005	Virus
C0003869	T047	Disease or Syndrome	C0004611	T007	Bacterium
C0003874	T047	Disease or Syndrome	C0004611	T007	Bacterium
C0003875	T047	Disease or Syndrome	C0042776	T005	Virus
C0004030	T047	Disease or Syndrome	C0004034	T004	Fungus
C0004030	T047	Disease or Syndrome	C0011746	T004	Fungus
C0004030	T047	Disease or Syndrome	C0016832	T004	Fungus
C0004031	T047	Disease or Syndrome	C0004034	T004	Fungus
C0004031	T047	Disease or Syndrome	C0011746	T004	Fungus
C0004031	T047	Disease or Syndrome	C0016832	T004	Fungus
C0004032	T047	Disease or Syndrome	C0004034	T004	Fungus
C0004032	T047	Disease or Syndrome	C0011746	T004	Fungus
C0004032	T047	Disease or Syndrome	C0016832	T004	Fungus
C0004421	T191	Neoplastic Process	C0079936	T005	Virus
C0004421	T191	Neoplastic Process	C0319094	T005	Virus
C0004426	T191	Neoplastic Process	C0004429	T005	Virus
C0004426	T191	Neoplastic Process	C0079936	T005	Virus
C0004610	T047	Disease or Syndrome	C0004611	T007	Bacterium
C0004623	T047	Disease or Syndrome	C0004611	T007	Bacterium
C0004626	T047	Disease or Syndrome	C0004611	T007	Bacterium
C0004659	T047	Disease or Syndrome	C0004611	T007	Bacterium
C0004669	T047	Disease or Syndrome	C0004661	T007	Bacterium
C0004669	T047	Disease or Syndrome	C0018150	T007	Bacterium
C0004681	T047	Disease or Syndrome	C0318210	T007	Bacterium
C0004766	T046	Pathologic Function	C0004611	T007	Bacterium
C0004771	T047	Disease or Syndrome	C0004770	T007	Bacterium
C0004771	T047	Disease or Syndrome	C0314752	T007	Bacterium
C0004771	T047	Disease or Syndrome	C0318324	T007	Bacterium
C0004945	T047	Disease or Syndrome	C0004611	T007	Bacterium
C0004945	T047	Disease or Syndrome	C0037973	T007	Bacterium
C0004945	T047	Disease or Syndrome	C0445932	T007	Bacterium
C0005716	T047	Disease or Syndrome	C0005715	T004	Fungus
C0005716	T047	Disease or Syndrome	C0011746	T004	Fungus
C0005716	T047	Disease or Syndrome	C0005713	T004	Fungus
C0005716	T047	Disease or Syndrome	C0016832	T004	Fungus
C0005717	T047	Disease or Syndrome	C0005715	T004	Fungus
C0005717	T047	Disease or Syndrome	C0011746	T004	Fungus
C0005721	T047	Disease or Syndrome	C1622980	T004	Fungus
C0005721	T047	Disease or Syndrome	C0011635	T004	Fungus
C0005721	T047	Disease or Syndrome	C0016832	T004	Fungus
C0005722	T047	Disease or Syndrome	C1622980	T004	Fungus
C0005723	T047	Disease or Syndrome	C1622980	T004	Fungus
C0005723	T047	Disease or Syndrome	C0011746	T004	Fungus
C0005723	T047	Disease or Syndrome	C0016832	T004	Fungus
C0005724	T047	Disease or Syndrome	C1622980	T004	Fungus
C0005724	T047	Disease or Syndrome	C0011746	T004	Fungus
C0005724	T047	Disease or Syndrome	C0016832	T004	Fungus
C0005750	T047	Disease or Syndrome	C0004611	T007	Bacterium
C0006015	T047	Disease or Syndrome	C0006013	T007	Bacterium
C0006023	T047	Disease or Syndrome	C0042776	T005	Virus
C0006035	T047	Disease or Syndrome	C0004611	T007	Bacterium
C0006035	T047	Disease or Syndrome	C0006033	T007	Bacterium
C0006035	T047	Disease or Syndrome	C0037973	T007	Bacterium
C0006039	T047	Disease or Syndrome	C0038170	T007	Bacterium
C0006057	T037	Injury or Poisoning	C0009055	T007	Bacterium
C0006060	T047	Disease or Syndrome	C0035584	T007	Bacterium
C0006060	T047	Disease or Syndrome	C0314752	T007	Bacterium
C0006060	T047	Disease or Syndrome	C1441158	T007	Bacterium
C0006060	T047	Disease or Syndrome	C0018150	T007	Bacterium
C0006060	T047	Disease or Syndrome	C0035583	T007	Bacterium
C0006181	T047	Disease or Syndrome	C0018150	T007	Bacterium
C0006181	T047	Disease or Syndrome	C0035587	T007	Bacterium
C0006181	T047	Disease or Syndrome	C0035596	T007	Bacterium
C0006181	T047	Disease or Syndrome	C0314752	T007	Bacterium
C0006181	T047	Disease or Syndrome	C0522411	T007	Bacterium
C0006309	T047	Disease or Syndrome	C0006303	T007	Bacterium
C0006309	T047	Disease or Syndrome	C0018150	T007	Bacterium
C0006391	T047	Disease or Syndrome	C0006394	T005	Virus
C0006391	T047	Disease or Syndrome	C0006395	T005	Virus
C0006396	T047	Disease or Syndrome	C0006395	T005	Virus
C0006396	T047	Disease or Syndrome	C0085377	T005	Virus
C0006818	T047	Disease or Syndrome	C0006813	T007	Bacterium
C0006818	T047	Disease or Syndrome	C0314752	T007	Bacterium
C0006840	T047	Disease or Syndrome	C0006836	T004	Fungus
C0006840	T047	Disease or Syndrome	C0011746	T004	Fungus
C0006842	T047	Disease or Syndrome	C0006836	T004	Fungus
C0006842	T047	Disease or Syndrome	C0006837	T004	Fungus
C0006842	T047	Disease or Syndrome	C0011746	T004	Fungus
C0006845	T047	Disease or Syndrome	C0006836	T004	Fungus
C0006845	T047	Disease or Syndrome	C0011746	T004	Fungus
C0006846	T047	Disease or Syndrome	C0006836	T004	Fungus
C0006846	T047	Disease or Syndrome	C0006837	T004	Fungus
C0006846	T047	Disease or Syndrome	C0011746	T004	Fungus
C0006848	T047	Disease or Syndrome	C0006836	T004	Fungus
C0006848	T047	Disease or Syndrome	C0016832	T004	Fungus
C0006848	T047	Disease or Syndrome	C0011746	T004	Fungus
C0006849	T047	Disease or Syndrome	C0006836	T004	Fungus
C0006849	T047	Disease or Syndrome	C0011746	T004	Fungus
C0006852	T047	Disease or Syndrome	C0006836	T004	Fungus
C0006852	T047	Disease or Syndrome	C0006837	T004	Fungus
C0006852	T047	Disease or Syndrome	C0011746	T004	Fungus
C0007078	T047	Disease or Syndrome	C0004611	T007	Bacterium
C0007361	T047	Disease or Syndrome	C0004770	T007	Bacterium
C0007361	T047	Disease or Syndrome	C0242631	T007	Bacterium
C0007645	T047	Disease or Syndrome	C0004611	T007	Bacterium
C0007940	T184	Sign or Symptom	C0011746	T004	Fungus
C0007940	T184	Sign or Symptom	C0016832	T004	Fungus
C0007940	T184	Sign or Symptom	C0038033	T004	Fungus
C0007943	T184	Sign or Symptom	C0004611	T007	Bacterium
C0007943	T184	Sign or Symptom	C0026912	T007	Bacterium
C0007943	T184	Sign or Symptom	C0026926	T007	Bacterium
C0007943	T184	Sign or Symptom	C1032649	T007	Bacterium
C0007944	T047	Disease or Syndrome	C0038172	T007	Bacterium
C0007947	T047	Disease or Syndrome	C0018481	T007	Bacterium
C0007969	T047	Disease or Syndrome	C0319971	T004	Fungus
C0008049	T047	Disease or Syndrome	C0042338	T005	Virus
C0008055	T047	Disease or Syndrome	C0003755	T005	Virus
C0008055	T047	Disease or Syndrome	C0006395	T005	Virus
C0008055	T047	Disease or Syndrome	C0008056	T005	Virus
C0008055	T047	Disease or Syndrome	C0042776	T005	Virus
C0008055	T047	Disease or Syndrome	C0206510	T005	Virus
C0008055	T047	Disease or Syndrome	C0206532	T005	Virus
C0008149	T047	Disease or Syndrome	C0008148	T007	Bacterium
C0008149	T047	Disease or Syndrome	C0008150	T007	Bacterium
C0008354	T047	Disease or Syndrome	C0042629	T007	Bacterium
C0008354	T047	Disease or Syndrome	C0318248	T007	Bacterium
C0008354	T047	Disease or Syndrome	C0004611	T007	Bacterium
C0008354	T047	Disease or Syndrome	C0018150	T007	Bacterium
C0008495	T046	Pathologic Function	C0004611	T007	Bacterium
C0008582	T047	Disease or Syndrome	C0016832	T004	Fungus
C0008582	T047	Disease or Syndrome	C0320060	T004	Fungus
C0008582	T047	Disease or Syndrome	C0320061	T004	Fungus
C0008591	T047	Disease or Syndrome	C0016832	T004	Fungus
C0008591	T047	Disease or Syndrome	C0320060	T004	Fungus
C0009062	T047	Disease or Syndrome	C0009054	T007	Bacterium
C0009186	T047	Disease or Syndrome	C0009184	T004	Fungus
C0009186	T047	Disease or Syndrome	C0009183	T004	Fungus
C0009186	T047	Disease or Syndrome	C0011746	T004	Fungus
C0009400	T047	Disease or Syndrome	C0009401	T005	Virus
C0009400	T047	Disease or Syndrome	C0035111	T005	Virus
C0009400	T047	Disease or Syndrome	C0206592	T005	Virus
C0009443	T047	Disease or Syndrome	C0042776	T005	Virus
C0009663	T047	Disease or Syndrome	C0021344	T005	Virus
C0009765	T047	Disease or Syndrome	C0014383	T005	Virus
C0009768	T047	Disease or Syndrome	C0004611	T007	Bacterium
C0009770	T047	Disease or Syndrome	C0008151	T007	Bacterium
C0009770	T047	Disease or Syndrome	C0008148	T007	Bacterium
C0009774	T047	Disease or Syndrome	C0042776	T005	Virus
C0010078	T047	Disease or Syndrome	C0010076	T005	Virus
C0010078	T047	Disease or Syndrome	C0206419	T005	Virus
C0010153	T047	Disease or Syndrome	C0010148	T007	Bacterium
C0010232	T047	Disease or Syndrome	C0010233	T005	Virus
C0010232	T047	Disease or Syndrome	C0032868	T005	Virus
C0010232	T047	Disease or Syndrome	C0206583	T005	Virus
C0010246	T047	Disease or Syndrome	C1331054	T005	Virus
C0010246	T047	Disease or Syndrome	C0031886	T005	Virus
C0010414	T047	Disease or Syndrome	C0010415	T004	Fungus
C0010414	T047	Disease or Syndrome	C0010416	T004	Fungus
C0010414	T047	Disease or Syndrome	C0011746	T004	Fungus
C0010414	T047	Disease or Syndrome	C0016832	T004	Fungus
C0010823	T047	Disease or Syndrome	C0010825	T005	Virus
C0010823	T047	Disease or Syndrome	C0205725	T005	Virus
C0010823	T047	Disease or Syndrome	C0206560	T005	Virus
C0010823	T047	Disease or Syndrome	C0019369	T005	Virus
C0011226	T047	Disease or Syndrome	C0011220	T005	Virus
C0011311	T047	Disease or Syndrome	C0011315	T005	Virus
C0011311	T047	Disease or Syndrome	C0040360	T005	Virus
C0011334	T047	Disease or Syndrome	C0004611	T007	Bacterium
C0011389	T047	Disease or Syndrome	C0004611	T007	Bacterium
C0011630	T047	Disease or Syndrome	C0016832	T004	Fungus
C0011630	T047	Disease or Syndrome	C0011635	T004	Fungus
C0011636	T047	Disease or Syndrome	C0011635	T004	Fungus
C0011636	T047	Disease or Syndrome	C0016832	T004	Fungus
C0011638	T047	Disease or Syndrome	C0011635	T004	Fungus
C0011640	T047	Disease or Syndrome	C0011635	T004	Fungus
C0011640	T047	Disease or Syndrome	C0016832	T004	Fungus
C0012546	T047	Disease or Syndrome	C0010150	T007	Bacterium
C0012546	T047	Disease or Syndrome	C1301419	T007	Bacterium
C0012553	T047	Disease or Syndrome	C0010150	T007	Bacterium
C0012553	T047	Disease or Syndrome	C1301419	T007	Bacterium
C0012554	T047	Disease or Syndrome	C0010150	T007	Bacterium
C0012554	T047	Disease or Syndrome	C1301419	T007	Bacterium
C0012555	T047	Disease or Syndrome	C0004611	T007	Bacterium
C0012555	T047	Disease or Syndrome	C0010150	T007	Bacterium
C0012555	T047	Disease or Syndrome	C1301419	T007	Bacterium
C0012556	T047	Disease or Syndrome	C0010150	T007	Bacterium
C0012556	T047	Disease or Syndrome	C1301419	T007	Bacterium
C0012557	T047	Disease or Syndrome	C0010150	T007	Bacterium
C0012557	T047	Disease or Syndrome	C1301419	T007	Bacterium
C0012558	T047	Disease or Syndrome	C0010150	T007	Bacterium
C0012558	T047	Disease or Syndrome	C1301419	T007	Bacterium
C0012738	T047	Disease or Syndrome	C0023859	T007	Bacterium
C0012738	T047	Disease or Syndrome	C0023861	T007	Bacterium
C0013371	T047	Disease or Syndrome	C0004611	T007	Bacterium
C0013371	T047	Disease or Syndrome	C0036953	T007	Bacterium
C0013533	T047	Disease or Syndrome	C0013534	T005	Virus
C0013533	T047	Disease or Syndrome	C0031886	T005	Virus
C0013568	T047	Disease or Syndrome	C0004611	T007	Bacterium
C0013568	T047	Disease or Syndrome	C0038411	T007	Bacterium
C0013568	T047	Disease or Syndrome	C0318154	T007	Bacterium
C0013570	T047	Disease or Syndrome	C0029200	T005	Virus
C0013570	T047	Disease or Syndrome	C0032868	T005	Virus
C0013591	T047	Disease or Syndrome	C0013590	T005	Virus
C0014009	T047	Disease or Syndrome	C0004611	T007	Bacterium
C0014013	T047	Disease or Syndrome	C0004611	T007	Bacterium
C0014014	T047	Disease or Syndrome	C0026912	T007	Bacterium
C0014014	T047	Disease or Syndrome	C0026926	T007	Bacterium
C0014014	T047	Disease or Syndrome	C1032649	T007	Bacterium
C0014040	T047	Disease or Syndrome	C0042776	T005	Virus
C0014053	T047	Disease or Syndrome	C0006755	T005	Virus
C0014053	T047	Disease or Syndrome	C0085377	T005	Virus
C0014053	T047	Disease or Syndrome	C0006395	T005	Virus
C0014053	T047	Disease or Syndrome	C0042776	T005	Virus
C0014054	T047	Disease or Syndrome	C0014045	T005	Virus
C0014054	T047	Disease or Syndrome	C0040360	T005	Virus
C0014054	T047	Disease or Syndrome	C0042776	T005	Virus
C0014055	T047	Disease or Syndrome	C0003725	T005	Virus
C0014055	T047	Disease or Syndrome	C0042776	T005	Virus
C0014057	T047	Disease or Syndrome	C0014047	T005	Virus
C0014057	T047	Disease or Syndrome	C0040360	T005	Virus
C0014057	T047	Disease or Syndrome	C0042776	T005	Virus
C0014060	T047	Disease or Syndrome	C0014048	T005	Virus
C0014060	T047	Disease or Syndrome	C0042776	T005	Virus
C0014060	T047	Disease or Syndrome	C0040360	T005	Virus
C0014061	T047	Disease or Syndrome	C0003725	T005	Virus
C0014061	T047	Disease or Syndrome	C0042776	T005	Virus
C0014061	T047	Disease or Syndrome	C0702091	T005	Virus
C0014078	T047	Disease or Syndrome	C0014049	T005	Virus
C0014078	T047	Disease or Syndrome	C0002331	T005	Virus
C0014121	T047	Disease or Syndrome	C0004611	T007	Bacterium
C0014122	T047	Disease or Syndrome	C0004611	T007	Bacterium
C0014336	T047	Disease or Syndrome	C0009054	T007	Bacterium
C0014336	T047	Disease or Syndrome	C0315165	T007	Bacterium
C0014342	T047	Disease or Syndrome	C0014338	T005	Virus
C0014347	T047	Disease or Syndrome	C0014346	T007	Bacterium
C0014378	T047	Disease or Syndrome	C0014383	T005	Virus
C0014378	T047	Disease or Syndrome	C0031886	T005	Virus
C0014434	T047	Disease or Syndrome	C0004595	T007	Bacterium
C0014476	T047	Disease or Syndrome	C0014475	T007	Bacterium
C0014476	T047	Disease or Syndrome	C0018150	T007	Bacterium
C0014476	T047	Disease or Syndrome	C0035583	T007	Bacterium
C0014476	T047	Disease or Syndrome	C0035596	T007	Bacterium
C0014476	T047	Disease or Syndrome	C0314752	T007	Bacterium
C0014481	T047	Disease or Syndrome	C0003725	T005	Virus
C0014481	T047	Disease or Syndrome	C0206547	T005	Virus
C0014493	T047	Disease or Syndrome	C0319171	T005	Virus
C0014498	T047	Disease or Syndrome	C0028422	T005	Virus
C0014498	T047	Disease or Syndrome	C0042776	T005	Virus
C0014521	T047	Disease or Syndrome	C0038172	T007	Bacterium
C0014521	T047	Disease or Syndrome	C0038411	T007	Bacterium
C0014522	T191	Neoplastic Process	C0021344	T005	Virus
C0014522	T191	Neoplastic Process	C0030358	T005	Virus
C0014522	T191	Neoplastic Process	C0042776	T005	Virus
C0014531	T047	Disease or Syndrome	C0014530	T004	Fungus
C0014531	T047	Disease or Syndrome	C0016832	T004	Fungus
C0014661	T047	Disease or Syndrome	C0014662	T005	Virus
C0014714	T037	Injury or Poisoning	C0086247	T004	Fungus
C0014718	T047	Disease or Syndrome	C0006836	T004	Fungus
C0014718	T047	Disease or Syndrome	C0006837	T004	Fungus
C0014718	T047	Disease or Syndrome	C0011746	T004	Fungus
C0014733	T047	Disease or Syndrome	C0318154	T007	Bacterium
C0014736	T047	Disease or Syndrome	C0004611	T007	Bacterium
C0014736	T047	Disease or Syndrome	C0014735	T007	Bacterium
C0014736	T047	Disease or Syndrome	C0014738	T007	Bacterium
C0014740	T047	Disease or Syndrome	C0004611	T007	Bacterium
C0014740	T047	Disease or Syndrome	C0006033	T007	Bacterium
C0014740	T047	Disease or Syndrome	C0006034	T007	Bacterium
C0014741	T047	Disease or Syndrome	C0026926	T007	Bacterium
C0014741	T047	Disease or Syndrome	C1032649	T007	Bacterium
C0014744	T047	Disease or Syndrome	C0026926	T007	Bacterium
C0014744	T047	Disease or Syndrome	C1032649	T007	Bacterium
C0014752	T047	Disease or Syndrome	C0004611	T007	Bacterium
C0014752	T047	Disease or Syndrome	C0010154	T007	Bacterium
C0014836	T047	Disease or Syndrome	C0014834	T007	Bacterium
C0014903	T047	Disease or Syndrome	C0008148	T007	Bacterium
C0014903	T047	Disease or Syndrome	C0008151	T007	Bacterium
C0015231	T047	Disease or Syndrome	C0040840	T007	Bacterium
C0015231	T047	Disease or Syndrome	C0019381	T005	Virus
C0015231	T047	Disease or Syndrome	C0042776	T005	Virus
C0015404	T047	Disease or Syndrome	C0004611	T007	Bacterium
C0015405	T047	Disease or Syndrome	C0016832	T004	Fungus
C0015407	T047	Disease or Syndrome	C0042776	T005	Virus
C0015632	T047	Disease or Syndrome	C0003725	T005	Virus
C0015632	T047	Disease or Syndrome	C0318788	T005	Virus
C0015632	T047	Disease or Syndrome	C0040360	T005	Virus
C0015632	T047	Disease or Syndrome	C0702091	T005	Virus
C0015632	T047	Disease or Syndrome	C0042776	T005	Virus
C0015634	T047	Disease or Syndrome	C0178863	T007	Bacterium
C0015674	T047	Disease or Syndrome	C0042776	T005	Virus
C0015765	T047	Disease or Syndrome	C0015766	T005	Virus
C0015765	T047	Disease or Syndrome	C0205762	T005	Virus
C0016047	T191	Neoplastic Process	C0036990	T005	Virus
C0016436	T047	Disease or Syndrome	C0004611	T007	Bacterium
C0016513	T047	Disease or Syndrome	C0016880	T007	Bacterium
C0016514	T047	Disease or Syndrome	C0949945	T005	Virus
C0016627	T047	Disease or Syndrome	C0029341	T005	Virus
C0016627	T047	Disease or Syndrome	C0029343	T005	Virus
C0016627	T047	Disease or Syndrome	C0042776	T005	Virus
C0016629	T047	Disease or Syndrome	C0016630	T005	Virus
C0016826	T046	Pathologic Function	C0016832	T004	Fungus
C0017105	T047	Disease or Syndrome	C0009054	T007	Bacterium
C0017162	T047	Disease or Syndrome	C0017161	T005	Virus
C0017409	T047	Disease or Syndrome	C0042338	T005	Virus
C0017418	T047	Disease or Syndrome	C0004611	T007	Bacterium
C0017418	T047	Disease or Syndrome	C0040840	T007	Bacterium
C0017455	T047	Disease or Syndrome	C0011746	T004	Fungus
C0017455	T047	Disease or Syndrome	C0016832	T004	Fungus
C0017455	T047	Disease or Syndrome	C0017456	T004	Fungus
C0017495	T047	Disease or Syndrome	C0446181	T005	Virus
C0017575	T047	Disease or Syndrome	C0004611	T007	Bacterium
C0017575	T047	Disease or Syndrome	C0085479	T007	Bacterium
C0017575	T047	Disease or Syndrome	C0016878	T007	Bacterium
C0017589	T047	Disease or Syndrome	C0033808	T007	Bacterium
C0017589	T047	Disease or Syndrome	C0033818	T007	Bacterium
C0018075	T047	Disease or Syndrome	C0004611	T007	Bacterium
C0018075	T047	Disease or Syndrome	C0027573	T007	Bacterium
C0018077	T047	Disease or Syndrome	C0004611	T007	Bacterium
C0018077	T047	Disease or Syndrome	C0027573	T007	Bacterium
C0018078	T047	Disease or Syndrome	C0027573	T007	Bacterium
C0018079	T047	Disease or Syndrome	C0027573	T007	Bacterium
C0018081	T047	Disease or Syndrome	C0027573	T007	Bacterium
C0018190	T047	Disease or Syndrome	C0006792	T007	Bacterium
C0018190	T047	Disease or Syndrome	C0314752	T007	Bacterium
C0018476	T047	Disease or Syndrome	C0026934	T007	Bacterium
C0018476	T047	Disease or Syndrome	C0035583	T007	Bacterium
C0018476	T047	Disease or Syndrome	C0314752	T007	Bacterium
C0018482	T047	Disease or Syndrome	C0018479	T007	Bacterium
C0018572	T047	Disease or Syndrome	C0014383	T005	Virus
C0018572	T047	Disease or Syndrome	C0031886	T005	Virus
C0018572	T047	Disease or Syndrome	C0950042	T005	Virus
C0018835	T047	Disease or Syndrome	C0035583	T007	Bacterium
C0018835	T047	Disease or Syndrome	C0086068	T007	Bacterium
C0018835	T047	Disease or Syndrome	C0314752	T007	Bacterium
C0019097	T047	Disease or Syndrome	C0019089	T005	Virus
C0019097	T047	Disease or Syndrome	C0206497	T005	Virus
C0019099	T047	Disease or Syndrome	C0009743	T005	Virus
C0019099	T047	Disease or Syndrome	C0042776	T005	Virus
C0019099	T047	Disease or Syndrome	C0085381	T005	Virus
C0019100	T047	Disease or Syndrome	C0003755	T005	Virus
C0019100	T047	Disease or Syndrome	C0006395	T005	Virus
C0019100	T047	Disease or Syndrome	C0011315	T005	Virus
C0019100	T047	Disease or Syndrome	C0040360	T005	Virus
C0019100	T047	Disease or Syndrome	C0042776	T005	Virus
C0019100	T047	Disease or Syndrome	C0206532	T005	Virus
C0019101	T047	Disease or Syndrome	C0086384	T005	Virus
C0019101	T047	Disease or Syndrome	C0019092	T005	Virus
C0019101	T047	Disease or Syndrome	C0205790	T005	Virus
C0019103	T047	Disease or Syndrome	C0028996	T005	Virus
C0019103	T047	Disease or Syndrome	C0040360	T005	Virus
C0019103	T047	Disease or Syndrome	C0042776	T005	Virus
C0019104	T047	Disease or Syndrome	C0042776	T005	Virus
C0019159	T047	Disease or Syndrome	C0376325	T005	Virus
C0019163	T047	Disease or Syndrome	C0042776	T005	Virus
C0019163	T047	Disease or Syndrome	C0019169	T005	Virus
C0019191	T047	Disease or Syndrome	C0019183	T005	Virus
C0019191	T047	Disease or Syndrome	C0319229	T005	Virus
C0019196	T047	Disease or Syndrome	C0220847	T005	Virus
C0019196	T047	Disease or Syndrome	C0016215	T005	Virus
C0019196	T047	Disease or Syndrome	C0040360	T005	Virus
C0019196	T047	Disease or Syndrome	C0042776	T005	Virus
C0019338	T047	Disease or Syndrome	C0031886	T005	Virus
C0019338	T047	Disease or Syndrome	C0042776	T005	Virus
C0019338	T047	Disease or Syndrome	C1331054	T005	Virus
C0019338	T047	Disease or Syndrome	C0014383	T005	Virus
C0019342	T047	Disease or Syndrome	C0319231	T005	Virus
C0019342	T047	Disease or Syndrome	C0319232	T005	Virus
C0019342	T047	Disease or Syndrome	C0019369	T005	Virus
C0019345	T047	Disease or Syndrome	C0019369	T005	Virus
C0019345	T047	Disease or Syndrome	C0319231	T005	Virus
C0019345	T047	Disease or Syndrome	C0319232	T005	Virus
C0019348	T047	Disease or Syndrome	C0019369	T005	Virus
C0019348	T047	Disease or Syndrome	C0319231	T005	Virus
C0019348	T047	Disease or Syndrome	C0319232	T005	Virus
C0019357	T047	Disease or Syndrome	C0319231	T005	Virus
C0019357	T047	Disease or Syndrome	C0319232	T005	Virus
C0019359	T047	Disease or Syndrome	C0019369	T005	Virus
C0019359	T047	Disease or Syndrome	C0319231	T005	Virus
C0019359	T047	Disease or Syndrome	C0319232	T005	Virus
C0019360	T047	Disease or Syndrome	C0042338	T005	Virus
C0019362	T047	Disease or Syndrome	C0042338	T005	Virus
C0019364	T047	Disease or Syndrome	C0042338	T005	Virus
C0019372	T047	Disease or Syndrome	C0019369	T005	Virus
C0019385	T047	Disease or Syndrome	C0019369	T005	Virus
C0019385	T047	Disease or Syndrome	C0042776	T005	Virus
C0019385	T047	Disease or Syndrome	C0319231	T005	Virus
C0019385	T047	Disease or Syndrome	C0319232	T005	Virus
C0019386	T047	Disease or Syndrome	C0019369	T005	Virus
C0019386	T047	Disease or Syndrome	C0319231	T005	Virus
C0019386	T047	Disease or Syndrome	C0319232	T005	Virus
C0019655	T047	Disease or Syndrome	C0019653	T004	Fungus
C0019655	T047	Disease or Syndrome	C0319941	T004	Fungus
C0019655	T047	Disease or Syndrome	C0011746	T004	Fungus
C0019655	T047	Disease or Syndrome	C0016832	T004	Fungus
C0019693	T047	Disease or Syndrome	C0019682	T005	Virus
C0019693	T047	Disease or Syndrome	C0079679	T005	Virus
C0019841	T047	Disease or Syndrome	C0003725	T005	Virus
C0019841	T047	Disease or Syndrome	C0019842	T005	Virus
C0019841	T047	Disease or Syndrome	C0040360	T005	Virus
C0020091	T047	Disease or Syndrome	C0035366	T005	Virus
C0020091	T047	Disease or Syndrome	C0206452	T005	Virus
C0020102	T047	Disease or Syndrome	C0020099	T005	Virus
C0020102	T047	Disease or Syndrome	C0035366	T005	Virus
C0020186	T019	Congenital Abnormality	C0004611	T007	Bacterium
C0020186	T019	Congenital Abnormality	C0040840	T007	Bacterium
C0021099	T047	Disease or Syndrome	C0004611	T007	Bacterium
C0021100	T047	Disease or Syndrome	C0004611	T007	Bacterium
C0021192	T047	Disease or Syndrome	C0026912	T007	Bacterium
C0021192	T047	Disease or Syndrome	C0026922	T007	Bacterium
C0021334	T047	Disease or Syndrome	C0021335	T005	Virus
C0021334	T047	Disease or Syndrome	C0319231	T005	Virus
C0021345	T047	Disease or Syndrome	C0014644	T005	Virus
C0021345	T047	Disease or Syndrome	C0019369	T005	Virus
C0021345	T047	Disease or Syndrome	C0042776	T005	Virus
C0021400	T047	Disease or Syndrome	C0029341	T005	Virus
C0021400	T047	Disease or Syndrome	C0042776	T005	Virus
C0021414	T047	Disease or Syndrome	C0029341	T005	Virus
C0021414	T047	Disease or Syndrome	C0042776	T005	Virus
C0021874	T047	Disease or Syndrome	C0004611	T007	Bacterium
C0022336	T047	Disease or Syndrome	C0079679	T005	Virus
C0022336	T047	Disease or Syndrome	C0446180	T005	Virus
C0022415	T047	Disease or Syndrome	C0026926	T007	Bacterium
C0022415	T047	Disease or Syndrome	C1032649	T007	Bacterium
C0022415	T047	Disease or Syndrome	C0004611	T007	Bacterium
C0022570	T047	Disease or Syndrome	C0319231	T005	Virus
C0022570	T047	Disease or Syndrome	C0319232	T005	Virus
C0022802	T047	Disease or Syndrome	C0022803	T005	Virus
C0022810	T047	Disease or Syndrome	C0022811	T005	Virus
C0022810	T047	Disease or Syndrome	C0042776	T005	Virus
C0023001	T047	Disease or Syndrome	C0023002	T005	Virus
C0023001	T047	Disease or Syndrome	C0040360	T005	Virus
C0023001	T047	Disease or Syndrome	C0042776	T005	Virus
C0023001	T047	Disease or Syndrome	C0446155	T005	Virus
C0023092	T047	Disease or Syndrome	C0023093	T005	Virus
C0023092	T047	Disease or Syndrome	C0206497	T005	Virus
C0023240	T047	Disease or Syndrome	C0023237	T007	Bacterium
C0023241	T047	Disease or Syndrome	C0023238	T007	Bacterium
C0023241	T047	Disease or Syndrome	C0004611	T007	Bacterium
C0023241	T047	Disease or Syndrome	C0023237	T007	Bacterium
C0023343	T047	Disease or Syndrome	C0026922	T007	Bacterium
C0023343	T047	Disease or Syndrome	C0026912	T007	Bacterium
C0023346	T047	Disease or Syndrome	C0026922	T007	Bacterium
C0023346	T047	Disease or Syndrome	C0026912	T007	Bacterium
C0023348	T047	Disease or Syndrome	C0026912	T007	Bacterium
C0023348	T047	Disease or Syndrome	C0026922	T007	Bacterium
C0023351	T047	Disease or Syndrome	C0026912	T007	Bacterium
C0023351	T047	Disease or Syndrome	C0026922	T007	Bacterium
C0023364	T047	Disease or Syndrome	C0004611	T007	Bacterium
C0023364	T047	Disease or Syndrome	C0023358	T007	Bacterium
C0023364	T047	Disease or Syndrome	C0037973	T007	Bacterium
C0023524	T047	Disease or Syndrome	C0022369	T005	Virus
C0023524	T047	Disease or Syndrome	C0032556	T005	Virus
C0023524	T047	Disease or Syndrome	C0949792	T005	Virus
C0023788	T047	Disease or Syndrome	C0004611	T007	Bacterium
C0023860	T047	Disease or Syndrome	C0023859	T007	Bacterium
C0023860	T047	Disease or Syndrome	C0023861	T007	Bacterium
C0023860	T047	Disease or Syndrome	C0018154	T007	Bacterium
C0023885	T047	Disease or Syndrome	C0004611	T007	Bacterium
C0023886	T047	Disease or Syndrome	C0004611	T007	Bacterium
C0024025	T047	Disease or Syndrome	C0024026	T005	Virus
C0024025	T047	Disease or Syndrome	C0040360	T005	Virus
C0024081	T047	Disease or Syndrome	C0004611	T007	Bacterium
C0024106	T047	Disease or Syndrome	C0024107	T005	Virus
C0024110	T047	Disease or Syndrome	C0004611	T007	Bacterium
C0024131	T047	Disease or Syndrome	C0026926	T007	Bacterium
C0024131	T047	Disease or Syndrome	C1032649	T007	Bacterium
C0024131	T047	Disease or Syndrome	C0026912	T007	Bacterium
C0024198	T047	Disease or Syndrome	C0004611	T007	Bacterium
C0024198	T047	Disease or Syndrome	C0006033	T007	Bacterium
C0024198	T047	Disease or Syndrome	C0006034	T007	Bacterium
C0024266	T047	Disease or Syndrome	C0024267	T005	Virus
C0024266	T047	Disease or Syndrome	C0042776	T005	Virus
C0024286	T047	Disease or Syndrome	C0008148	T007	Bacterium
C0024286	T047	Disease or Syndrome	C0008151	T007	Bacterium
C0024449	T047	Disease or Syndrome	C0016832	T004	Fungus
C0024788	T047	Disease or Syndrome	C0024787	T005	Virus
C0024788	T047	Disease or Syndrome	C0042776	T005	Virus
C0024788	T047	Disease or Syndrome	C0085150	T005	Virus
C0024793	T191	Neoplastic Process	C0019369	T005	Virus
C0025007	T047	Disease or Syndrome	C0025011	T005	Virus
C0025007	T047	Disease or Syndrome	C0030465	T005	Virus
C0025229	T047	Disease or Syndrome	C0033819	T007	Bacterium
C0025229	T047	Disease or Syndrome	C0033808	T007	Bacterium
C0025292	T047	Disease or Syndrome	C0004611	T007	Bacterium
C0025292	T047	Disease or Syndrome	C0018479	T007	Bacterium
C0025293	T047	Disease or Syndrome	C0004611	T007	Bacterium
C0025293	T047	Disease or Syndrome	C0018154	T007	Bacterium
C0025293	T047	Disease or Syndrome	C0023861	T007	Bacterium
C0025294	T047	Disease or Syndrome	C0004611	T007	Bacterium
C0025294	T047	Disease or Syndrome	C0027575	T007	Bacterium
C0025294	T047	Disease or Syndrome	C0314754	T007	Bacterium
C0025295	T047	Disease or Syndrome	C0038410	T007	Bacterium
C0025297	T047	Disease or Syndrome	C0042776	T005	Virus
C0025303	T047	Disease or Syndrome	C0027575	T007	Bacterium
C0025303	T047	Disease or Syndrome	C0314754	T007	Bacterium
C0025306	T047	Disease or Syndrome	C0027575	T007	Bacterium
C0025306	T047	Disease or Syndrome	C0314754	T007	Bacterium
C0025306	T047	Disease or Syndrome	C0004611	T007	Bacterium
C0026143	T047	Disease or Syndrome	C0030531	T005	Virus
C0026143	T047	Disease or Syndrome	C0032868	T005	Virus
C0026393	T047	Disease or Syndrome	C0026394	T005	Virus
C0026393	T047	Disease or Syndrome	C0032868	T005	Virus
C0026393	T047	Disease or Syndrome	C0042776	T005	Virus
C0026691	T047	Disease or Syndrome	C0042776	T005	Virus
C0026718	T047	Disease or Syndrome	C0016832	T004	Fungus
C0026718	T047	Disease or Syndrome	C0026716	T004	Fungus
C0026718	T047	Disease or Syndrome	C0026717	T004	Fungus
C0026718	T047	Disease or Syndrome	C0319495	T004	Fungus
C0026780	T047	Disease or Syndrome	C0026783	T005	Virus
C0026780	T047	Disease or Syndrome	C0206533	T005	Virus
C0026916	T047	Disease or Syndrome	C0086662	T007	Bacterium
C0026916	T047	Disease or Syndrome	C1265234	T007	Bacterium
C0026918	T047	Disease or Syndrome	C0026912	T007	Bacterium
C0026918	T047	Disease or Syndrome	C1295863	T007	Bacterium
C0026919	T047	Disease or Syndrome	C1265234	T007	Bacterium
C0026919	T047	Disease or Syndrome	C0026912	T007	Bacterium
C0026936	T047	Disease or Syndrome	C0026934	T007	Bacterium
C0026936	T047	Disease or Syndrome	C0018150	T007	Bacterium
C0026946	T047	Disease or Syndrome	C0016832	T004	Fungus
C0027345	T047	Disease or Syndrome	C0027346	T005	Virus
C0027345	T047	Disease or Syndrome	C0085381	T005	Virus
C0027537	T047	Disease or Syndrome	C0016880	T007	Bacterium
C0027537	T047	Disease or Syndrome	C0018150	T007	Bacterium
C0027927	T047	Disease or Syndrome	C0004611	T007	Bacterium
C0027927	T047	Disease or Syndrome	C0040840	T007	Bacterium
C0027982	T047	Disease or Syndrome	C0042776	T005	Virus
C0027983	T047	Disease or Syndrome	C0027984	T005	Virus
C0028242	T047	Disease or Syndrome	C0028240	T007	Bacterium
C0028271	T047	Disease or Syndrome	C0016878	T007	Bacterium
C0029119	T047	Disease or Syndrome	C0016832	T004	Fungus
C0029291	T047	Disease or Syndrome	C0008148	T007	Bacterium
C0029291	T047	Disease or Syndrome	C0008150	T007	Bacterium
C0029307	T047	Disease or Syndrome	C0004770	T007	Bacterium
C0029307	T047	Disease or Syndrome	C0314752	T007	Bacterium
C0029307	T047	Disease or Syndrome	C0318324	T007	Bacterium
C0029342	T047	Disease or Syndrome	C0029341	T005	Virus
C0029342	T047	Disease or Syndrome	C0042776	T005	Virus
C0029527	T047	Disease or Syndrome	C0006303	T007	Bacterium
C0029667	T047	Disease or Syndrome	C0003725	T005	Virus
C0029667	T047	Disease or Syndrome	C0042776	T005	Virus
C0029730	T047	Disease or Syndrome	C0038402	T007	Bacterium
C0029751	T047	Disease or Syndrome	C0004611	T007	Bacterium
C0029751	T047	Disease or Syndrome	C0040840	T007	Bacterium
C0029763	T047	Disease or Syndrome	C0016832	T004	Fungus
C0029764	T047	Disease or Syndrome	C0010150	T007	Bacterium
C0029764	T047	Disease or Syndrome	C1301419	T007	Bacterium
C0029815	T047	Disease or Syndrome	C0027575	T007	Bacterium
C0029815	T047	Disease or Syndrome	C0314754	T007	Bacterium
C0029817	T047	Disease or Syndrome	C0004611	T007	Bacterium
C0029817	T047	Disease or Syndrome	C0040840	T007	Bacterium
C0029818	T047	Disease or Syndrome	C0042776	T005	Virus
C0029826	T047	Disease or Syndrome	C0036111	T007	Bacterium
C0029830	T047	Disease or Syndrome	C0004611	T007	Bacterium
C0029830	T047	Disease or Syndrome	C0037973	T007	Bacterium
C0029830	T047	Disease or Syndrome	C0699955	T007	Bacterium
C0029835	T047	Disease or Syndrome	C0016677	T007	Bacterium
C0029841	T047	Disease or Syndrome	C0042776	T005	Virus
C0029843	T047	Disease or Syndrome	C0042776	T005	Virus
C0029871	T047	Disease or Syndrome	C0042776	T005	Virus
C0029888	T047	Disease or Syndrome	C0004611	T007	Bacterium
C0029895	T047	Disease or Syndrome	C0016832	T004	Fungus
C0030357	T191	Neoplastic Process	C0030358	T005	Virus
C0030357	T191	Neoplastic Process	C0036991	T005	Virus
C0030364	T047	Disease or Syndrome	C0042776	T005	Virus
C0030364	T047	Disease or Syndrome	C0319132	T005	Virus
C0030372	T047	Disease or Syndrome	C1457865	T005	Virus
C0030372	T047	Disease or Syndrome	C0085377	T005	Virus
C0030389	T047	Disease or Syndrome	C0030393	T005	Virus
C0030389	T047	Disease or Syndrome	C0206533	T005	Virus
C0030389	T047	Disease or Syndrome	C1319861	T005	Virus
C0030409	T047	Disease or Syndrome	C1622980	T004	Fungus
C0030409	T047	Disease or Syndrome	C0011746	T004	Fungus
C0030409	T047	Disease or Syndrome	C0016832	T004	Fungus
C0030455	T047	Disease or Syndrome	C0004611	T007	Bacterium
C0030481	T047	Disease or Syndrome	C0020094	T005	Virus
C0030524	T047	Disease or Syndrome	C0085442	T007	Bacterium
C0030524	T047	Disease or Syndrome	C1265234	T007	Bacterium
C0030528	T047	Disease or Syndrome	C0004611	T007	Bacterium
C0030528	T047	Disease or Syndrome	C0036111	T007	Bacterium
C0030528	T047	Disease or Syndrome	C0445750	T007	Bacterium
C0030578	T047	Disease or Syndrome	C0006837	T004	Fungus
C0030578	T047	Disease or Syndrome	C0033809	T007	Bacterium
C0030636	T047	Disease or Syndrome	C0030635	T007	Bacterium
C0030781	T047	Disease or Syndrome	C0035791	T007	Bacterium
C0030785	T047	Disease or Syndrome	C0004611	T007	Bacterium
C0031019	T047	Disease or Syndrome	C0004611	T007	Bacterium
C0031024	T047	Disease or Syndrome	C0004611	T007	Bacterium
C0031049	T047	Disease or Syndrome	C0026912	T007	Bacterium
C0031049	T047	Disease or Syndrome	C0026926	T007	Bacterium
C0031049	T047	Disease or Syndrome	C1032649	T007	Bacterium
C0031085	T047	Disease or Syndrome	C0004611	T007	Bacterium
C0031157	T047	Disease or Syndrome	C0004611	T007	Bacterium
C0031159	T047	Disease or Syndrome	C0021344	T005	Virus
C0031159	T047	Disease or Syndrome	C0030358	T005	Virus
C0031159	T047	Disease or Syndrome	C0042776	T005	Virus
C0031160	T047	Disease or Syndrome	C0006836	T004	Fungus
C0031160	T047	Disease or Syndrome	C0011746	T004	Fungus
C0031351	T047	Disease or Syndrome	C0001483	T005	Virus
C0031351	T047	Disease or Syndrome	C0001490	T005	Virus
C0031887	T047	Disease or Syndrome	C0031886	T005	Virus
C0031898	T047	Disease or Syndrome	C0011635	T004	Fungus
C0031898	T047	Disease or Syndrome	C0016832	T004	Fungus
C0031946	T047	Disease or Syndrome	C0004611	T007	Bacterium
C0031946	T047	Disease or Syndrome	C0040838	T007	Bacterium
C0031946	T047	Disease or Syndrome	C0037973	T007	Bacterium
C0032026	T047	Disease or Syndrome	C0042776	T005	Virus
C0032064	T047	Disease or Syndrome	C0043408	T007	Bacterium
C0032064	T047	Disease or Syndrome	C0043405	T007	Bacterium
C0032238	T047	Disease or Syndrome	C0014383	T005	Virus
C0032238	T047	Disease or Syndrome	C0031886	T005	Virus
C0032269	T047	Disease or Syndrome	C0038410	T007	Bacterium
C0032286	T047	Disease or Syndrome	C0004611	T007	Bacterium
C0032302	T047	Disease or Syndrome	C0004611	T007	Bacterium
C0032302	T047	Disease or Syndrome	C0018150	T007	Bacterium
C0032302	T047	Disease or Syndrome	C0026941	T007	Bacterium
C0032306	T047	Disease or Syndrome	C0042803	T005	Virus
C0032307	T047	Disease or Syndrome	C0018150	T007	Bacterium
C0032307	T047	Disease or Syndrome	C0035583	T007	Bacterium
C0032307	T047	Disease or Syndrome	C0314752	T007	Bacterium
C0032308	T047	Disease or Syndrome	C0038170	T007	Bacterium
C0032310	T047	Disease or Syndrome	C0042776	T005	Virus
C0032371	T047	Disease or Syndrome	C0014383	T005	Virus
C0032371	T047	Disease or Syndrome	C0206435	T005	Virus
C0032371	T047	Disease or Syndrome	C0031886	T005	Virus
C0032372	T047	Disease or Syndrome	C0031886	T005	Virus
C0032372	T047	Disease or Syndrome	C0206435	T005	Virus
C0032372	T047	Disease or Syndrome	C0014383	T005	Virus
C0032768	T047	Disease or Syndrome	C0042338	T005	Virus
C0032858	T047	Disease or Syndrome	C0032859	T005	Virus
C0032858	T047	Disease or Syndrome	C0040360	T005	Virus
C0032858	T047	Disease or Syndrome	C0446155	T005	Virus
C0032858	T047	Disease or Syndrome	C0702091	T005	Virus
C0032870	T047	Disease or Syndrome	C0032868	T005	Virus
C0032870	T047	Disease or Syndrome	C0206570	T005	Virus
C0033359	T047	Disease or Syndrome	C0035924	T005	Virus
C0033359	T047	Disease or Syndrome	C0040360	T005	Virus
C0033359	T047	Disease or Syndrome	C0042776	T005	Virus
C0033700	T047	Disease or Syndrome	C0033697	T007	Bacterium
C0033817	T047	Disease or Syndrome	C0033808	T007	Bacterium
C0033839	T047	Disease or Syndrome	C0206557	T005	Virus
C0033839	T047	Disease or Syndrome	C0319231	T005	Virus
C0034049	T047	Disease or Syndrome	C0079936	T005	Virus
C0034049	T047	Disease or Syndrome	C0887881	T005	Virus
C0034212	T047	Disease or Syndrome	C0004611	T007	Bacterium
C0034216	T047	Disease or Syndrome	C0004611	T007	Bacterium
C0034362	T047	Disease or Syndrome	C0010240	T007	Bacterium
C0034362	T047	Disease or Syndrome	C0018150	T007	Bacterium
C0034494	T047	Disease or Syndrome	C0034497	T005	Virus
C0034494	T047	Disease or Syndrome	C0035414	T005	Virus
C0034686	T047	Disease or Syndrome	C0004611	T007	Bacterium
C0034686	T047	Disease or Syndrome	C0037973	T007	Bacterium
C0034686	T047	Disease or Syndrome	C0318099	T007	Bacterium
C0034686	T047	Disease or Syndrome	C0318138	T007	Bacterium
C0034686	T047	Disease or Syndrome	C0699955	T007	Bacterium
C0035021	T047	Disease or Syndrome	C0004611	T007	Bacterium
C0035021	T047	Disease or Syndrome	C0006033	T007	Bacterium
C0035021	T047	Disease or Syndrome	C0037973	T007	Bacterium
C0035022	T047	Disease or Syndrome	C0004611	T007	Bacterium
C0035022	T047	Disease or Syndrome	C0006033	T007	Bacterium
C0035022	T047	Disease or Syndrome	C0037973	T007	Bacterium
C0035112	T047	Disease or Syndrome	C0999948	T005	Virus
C0035112	T047	Disease or Syndrome	C0035111	T005	Virus
C0035112	T047	Disease or Syndrome	C0206596	T005	Virus
C0035235	T047	Disease or Syndrome	C0206543	T005	Virus
C0035235	T047	Disease or Syndrome	C0206545	T005	Virus
C0035319	T047	Disease or Syndrome	C0019369	T005	Virus
C0035319	T047	Disease or Syndrome	C0042776	T005	Virus
C0035369	T047	Disease or Syndrome	C0035366	T005	Virus
C0035436	T047	Disease or Syndrome	C0038411	T007	Bacterium
C0035436	T047	Disease or Syndrome	C0038402	T007	Bacterium
C0035439	T047	Disease or Syndrome	C0038402	T007	Bacterium
C0035440	T047	Disease or Syndrome	C0038402	T007	Bacterium
C0035468	T047	Disease or Syndrome	C0014346	T007	Bacterium
C0035468	T047	Disease or Syndrome	C0022727	T007	Bacterium
C0035468	T047	Disease or Syndrome	C0022731	T007	Bacterium
C0035469	T047	Disease or Syndrome	C0016832	T004	Fungus
C0035469	T047	Disease or Syndrome	C0035471	T004	Fungus
C0035585	T047	Disease or Syndrome	C0035583	T007	Bacterium
C0035585	T047	Disease or Syndrome	C0314752	T007	Bacterium
C0035585	T047	Disease or Syndrome	C0018150	T007	Bacterium
C0035585	T047	Disease or Syndrome	C0035596	T007	Bacterium
C0035585	T047	Disease or Syndrome	C0085507	T007	Bacterium
C0035597	T047	Disease or Syndrome	C0018150	T007	Bacterium
C0035597	T047	Disease or Syndrome	C0035583	T007	Bacterium
C0035597	T047	Disease or Syndrome	C0314752	T007	Bacterium
C0035597	T047	Disease or Syndrome	C0318313	T007	Bacterium
C0035613	T047	Disease or Syndrome	C0035614	T005	Virus
C0035613	T047	Disease or Syndrome	C0040360	T005	Virus
C0035613	T047	Disease or Syndrome	C0085377	T005	Virus
C0035613	T047	Disease or Syndrome	C1457865	T005	Virus
C0035637	T047	Disease or Syndrome	C0035638	T005	Virus
C0035793	T047	Disease or Syndrome	C0035588	T007	Bacterium
C0035793	T047	Disease or Syndrome	C0314752	T007	Bacterium
C0035793	T047	Disease or Syndrome	C0018150	T007	Bacterium
C0035865	T047	Disease or Syndrome	C0035866	T005	Virus
C0035869	T047	Disease or Syndrome	C0035870	T005	Virus
C0035920	T047	Disease or Syndrome	C0035924	T005	Virus
C0035920	T047	Disease or Syndrome	C0040360	T005	Virus
C0035921	T019	Congenital Abnormality	C0035924	T005	Virus
C0035921	T047	Disease or Syndrome	C0035924	T005	Virus
C0035921	T019	Congenital Abnormality	C0040360	T005	Virus
C0035921	T047	Disease or Syndrome	C0040360	T005	Virus
C0035921	T019	Congenital Abnormality	C0042776	T005	Virus
C0035921	T047	Disease or Syndrome	C0042776	T005	Virus
C0036114	T037	Injury or Poisoning	C0004611	T007	Bacterium
C0036114	T037	Injury or Poisoning	C0036111	T007	Bacterium
C0036117	T047	Disease or Syndrome	C0036111	T007	Bacterium
C0036285	T047	Disease or Syndrome	C0038402	T007	Bacterium
C0036285	T047	Disease or Syndrome	C0038411	T007	Bacterium
C0036467	T047	Disease or Syndrome	C0026912	T007	Bacterium
C0036467	T047	Disease or Syndrome	C0026926	T007	Bacterium
C0036467	T047	Disease or Syndrome	C1032649	T007	Bacterium
C0036472	T047	Disease or Syndrome	C0035583	T007	Bacterium
C0036472	T047	Disease or Syndrome	C0035589	T007	Bacterium
C0036472	T047	Disease or Syndrome	C0314752	T007	Bacterium
C0036472	T047	Disease or Syndrome	C1441158	T007	Bacterium
C0036472	T047	Disease or Syndrome	C0018150	T007	Bacterium
C0036472	T047	Disease or Syndrome	C0085507	T007	Bacterium
C0036685	T047	Disease or Syndrome	C0018150	T007	Bacterium
C0036686	T047	Disease or Syndrome	C0018154	T007	Bacterium
C0036689	T047	Disease or Syndrome	C0038402	T007	Bacterium
C0036981	T046	Pathologic Function	C0018150	T007	Bacterium
C0037118	T047	Disease or Syndrome	C0026912	T007	Bacterium
C0037118	T047	Disease or Syndrome	C1032649	T007	Bacterium
C0037140	T047	Disease or Syndrome	C0019369	T005	Virus
C0037140	T047	Disease or Syndrome	C0019378	T005	Virus
C0037140	T047	Disease or Syndrome	C0319231	T005	Virus
C0037169	T047	Disease or Syndrome	C0037170	T005	Virus
C0037354	T047	Disease or Syndrome	C0037356	T005	Virus
C0037354	T047	Disease or Syndrome	C0032868	T005	Virus
C0037354	T047	Disease or Syndrome	C0042776	T005	Virus
C0037357	T047	Disease or Syndrome	C0037356	T005	Virus
C0037357	T047	Disease or Syndrome	C0032868	T005	Virus
C0037357	T047	Disease or Syndrome	C0042776	T005	Virus
C0037358	T047	Disease or Syndrome	C0032868	T005	Virus
C0037358	T047	Disease or Syndrome	C0037356	T005	Virus
C0037358	T047	Disease or Syndrome	C0042776	T005	Virus
C0037974	T047	Disease or Syndrome	C0004611	T007	Bacterium
C0037974	T047	Disease or Syndrome	C0037973	T007	Bacterium
C0037974	T047	Disease or Syndrome	C0699955	T007	Bacterium
C0038034	T047	Disease or Syndrome	C0038033	T004	Fungus
C0038034	T047	Disease or Syndrome	C0011746	T004	Fungus
C0038034	T047	Disease or Syndrome	C0016832	T004	Fungus
C0038041	T047	Disease or Syndrome	C0035583	T007	Bacterium
C0038041	T047	Disease or Syndrome	C0314752	T007	Bacterium
C0038041	T047	Disease or Syndrome	C1533182	T007	Bacterium
C0038041	T047	Disease or Syndrome	C0018150	T007	Bacterium
C0038157	T047	Disease or Syndrome	C0038170	T007	Bacterium
C0038159	T047	Disease or Syndrome	C0004611	T007	Bacterium
C0038159	T047	Disease or Syndrome	C0038170	T007	Bacterium
C0038160	T047	Disease or Syndrome	C0038170	T007	Bacterium
C0038165	T047	Disease or Syndrome	C0038170	T007	Bacterium
C0038165	T047	Disease or Syndrome	C0004611	T007	Bacterium
C0038166	T047	Disease or Syndrome	C0038170	T007	Bacterium
C0038343	T046	Pathologic Function	C0004611	T007	Bacterium
C0038395	T047	Disease or Syndrome	C0038402	T007	Bacterium
C0038522	T047	Disease or Syndrome	C0025011	T005	Virus
C0038522	T047	Disease or Syndrome	C0030465	T005	Virus
C0038522	T047	Disease or Syndrome	C0042776	T005	Virus
C0038522	T047	Disease or Syndrome	C0206536	T005	Virus
C0038565	T047	Disease or Syndrome	C0004611	T007	Bacterium
C0038992	T047	Disease or Syndrome	C0042776	T005	Virus
C0039010	T047	Disease or Syndrome	C0014384	T005	Virus
C0039023	T047	Disease or Syndrome	C0004611	T007	Bacterium
C0039127	T047	Disease or Syndrome	C0004611	T007	Bacterium
C0039127	T047	Disease or Syndrome	C0040840	T007	Bacterium
C0039128	T047	Disease or Syndrome	C0004611	T007	Bacterium
C0039128	T047	Disease or Syndrome	C0040840	T007	Bacterium
C0039130	T047	Disease or Syndrome	C0004611	T007	Bacterium
C0039130	T047	Disease or Syndrome	C0040840	T007	Bacterium
C0039131	T047	Disease or Syndrome	C0004611	T007	Bacterium
C0039131	T047	Disease or Syndrome	C0040840	T007	Bacterium
C0039132	T047	Disease or Syndrome	C0004611	T007	Bacterium
C0039132	T047	Disease or Syndrome	C0040840	T007	Bacterium
C0039133	T047	Disease or Syndrome	C0040840	T007	Bacterium
C0039133	T047	Disease or Syndrome	C0004611	T007	Bacterium
C0039137	T047	Disease or Syndrome	C0004611	T007	Bacterium
C0039137	T047	Disease or Syndrome	C0040840	T007	Bacterium
C0039223	T047	Disease or Syndrome	C0004611	T007	Bacterium
C0039223	T047	Disease or Syndrome	C0040840	T007	Bacterium
C0039614	T047	Disease or Syndrome	C0009064	T007	Bacterium
C0040150	T047	Disease or Syndrome	C0004611	T007	Bacterium
C0040199	T047	Disease or Syndrome	C0042776	T005	Virus
C0040249	T047	Disease or Syndrome	C0011635	T004	Fungus
C0040249	T047	Disease or Syndrome	C0016832	T004	Fungus
C0040249	T047	Disease or Syndrome	C0040944	T004	Fungus
C0040250	T047	Disease or Syndrome	C0011635	T004	Fungus
C0040250	T047	Disease or Syndrome	C0016832	T004	Fungus
C0040252	T047	Disease or Syndrome	C0011635	T004	Fungus
C0040252	T047	Disease or Syndrome	C0016832	T004	Fungus
C0040253	T047	Disease or Syndrome	C0011635	T004	Fungus
C0040253	T047	Disease or Syndrome	C0016832	T004	Fungus
C0040254	T047	Disease or Syndrome	C0016832	T004	Fungus
C0040254	T047	Disease or Syndrome	C0040936	T004	Fungus
C0040255	T047	Disease or Syndrome	C0016832	T004	Fungus
C0040255	T047	Disease or Syndrome	C0319991	T004	Fungus
C0040259	T047	Disease or Syndrome	C0011635	T004	Fungus
C0040259	T047	Disease or Syndrome	C0016832	T004	Fungus
C0040261	T047	Disease or Syndrome	C0011635	T004	Fungus
C0040261	T047	Disease or Syndrome	C0016832	T004	Fungus
C0040262	T047	Disease or Syndrome	C0016832	T004	Fungus
C0040262	T047	Disease or Syndrome	C0032030	T004	Fungus
C0040361	T047	Disease or Syndrome	C0040360	T005	Virus
C0040592	T047	Disease or Syndrome	C0008151	T007	Bacterium
C0040830	T047	Disease or Syndrome	C0018150	T007	Bacterium
C0040830	T047	Disease or Syndrome	C0035583	T007	Bacterium
C0040830	T047	Disease or Syndrome	C0035596	T007	Bacterium
C0040830	T047	Disease or Syndrome	C0035791	T007	Bacterium
C0040830	T047	Disease or Syndrome	C0314752	T007	Bacterium
C0040930	T047	Disease or Syndrome	C0004611	T007	Bacterium
C0040930	T047	Disease or Syndrome	C0018154	T007	Bacterium
C0040930	T047	Disease or Syndrome	C0315195	T007	Bacterium
C0040938	T047	Disease or Syndrome	C0011746	T004	Fungus
C0040938	T047	Disease or Syndrome	C0016832	T004	Fungus
C0040938	T047	Disease or Syndrome	C0040933	T004	Fungus
C0041188	T047	Disease or Syndrome	C0004611	T007	Bacterium
C0041295	T047	Disease or Syndrome	C0026912	T007	Bacterium
C0041295	T047	Disease or Syndrome	C0026926	T007	Bacterium
C0041295	T047	Disease or Syndrome	C1032649	T007	Bacterium
C0041296	T047	Disease or Syndrome	C0026926	T007	Bacterium
C0041296	T047	Disease or Syndrome	C1032649	T007	Bacterium
C0041296	T047	Disease or Syndrome	C0026912	T007	Bacterium
C0041300	T047	Disease or Syndrome	C0026926	T007	Bacterium
C0041300	T047	Disease or Syndrome	C1032649	T007	Bacterium
C0041301	T047	Disease or Syndrome	C0026926	T007	Bacterium
C0041301	T047	Disease or Syndrome	C1032649	T007	Bacterium
C0041306	T047	Disease or Syndrome	C0026913	T007	Bacterium
C0041306	T047	Disease or Syndrome	C1265234	T007	Bacterium
C0041307	T047	Disease or Syndrome	C0026917	T007	Bacterium
C0041307	T047	Disease or Syndrome	C1265234	T007	Bacterium
C0041309	T047	Disease or Syndrome	C0004611	T007	Bacterium
C0041309	T047	Disease or Syndrome	C0026912	T007	Bacterium
C0041309	T047	Disease or Syndrome	C0026926	T007	Bacterium
C0041309	T047	Disease or Syndrome	C1032649	T007	Bacterium
C0041312	T047	Disease or Syndrome	C0026926	T007	Bacterium
C0041312	T047	Disease or Syndrome	C1032649	T007	Bacterium
C0041312	T047	Disease or Syndrome	C0026912	T007	Bacterium
C0041313	T047	Disease or Syndrome	C0026912	T007	Bacterium
C0041313	T047	Disease or Syndrome	C0026926	T007	Bacterium
C0041313	T047	Disease or Syndrome	C1032649	T007	Bacterium
C0041315	T047	Disease or Syndrome	C0026912	T007	Bacterium
C0041315	T047	Disease or Syndrome	C0026926	T007	Bacterium
C0041315	T047	Disease or Syndrome	C1032649	T007	Bacterium
C0041316	T047	Disease or Syndrome	C0026912	T007	Bacterium
C0041316	T047	Disease or Syndrome	C0026926	T007	Bacterium
C0041316	T047	Disease or Syndrome	C1032649	T007	Bacterium
C0041317	T047	Disease or Syndrome	C0026912	T007	Bacterium
C0041317	T047	Disease or Syndrome	C0026926	T007	Bacterium
C0041317	T047	Disease or Syndrome	C1032649	T007	Bacterium
C0041318	T047	Disease or Syndrome	C0026926	T007	Bacterium
C0041318	T047	Disease or Syndrome	C1032649	T007	Bacterium
C0041318	T047	Disease or Syndrome	C0004611	T007	Bacterium
C0041318	T047	Disease or Syndrome	C0026912	T007	Bacterium
C0041321	T047	Disease or Syndrome	C0026926	T007	Bacterium
C0041321	T047	Disease or Syndrome	C1032649	T007	Bacterium
C0041321	T047	Disease or Syndrome	C0026912	T007	Bacterium
C0041322	T047	Disease or Syndrome	C0026926	T007	Bacterium
C0041322	T047	Disease or Syndrome	C1032649	T007	Bacterium
C0041322	T047	Disease or Syndrome	C0004611	T007	Bacterium
C0041322	T047	Disease or Syndrome	C0026912	T007	Bacterium
C0041323	T047	Disease or Syndrome	C0026926	T007	Bacterium
C0041323	T047	Disease or Syndrome	C1032649	T007	Bacterium
C0041324	T047	Disease or Syndrome	C0026926	T007	Bacterium
C0041324	T047	Disease or Syndrome	C1032649	T007	Bacterium
C0041324	T047	Disease or Syndrome	C0026912	T007	Bacterium
C0041325	T047	Disease or Syndrome	C0004611	T007	Bacterium
C0041325	T047	Disease or Syndrome	C0026912	T007	Bacterium
C0041325	T047	Disease or Syndrome	C0026926	T007	Bacterium
C0041325	T047	Disease or Syndrome	C1032649	T007	Bacterium
C0041326	T047	Disease or Syndrome	C0026926	T007	Bacterium
C0041326	T047	Disease or Syndrome	C1032649	T007	Bacterium
C0041326	T047	Disease or Syndrome	C0026912	T007	Bacterium
C0041327	T047	Disease or Syndrome	C0026926	T007	Bacterium
C0041327	T047	Disease or Syndrome	C1032649	T007	Bacterium
C0041327	T047	Disease or Syndrome	C0026912	T007	Bacterium
C0041328	T047	Disease or Syndrome	C0026926	T007	Bacterium
C0041328	T047	Disease or Syndrome	C1032649	T007	Bacterium
C0041328	T047	Disease or Syndrome	C0026912	T007	Bacterium
C0041330	T047	Disease or Syndrome	C0026912	T007	Bacterium
C0041330	T047	Disease or Syndrome	C0026926	T007	Bacterium
C0041330	T047	Disease or Syndrome	C1032649	T007	Bacterium
C0041331	T047	Disease or Syndrome	C0026912	T007	Bacterium
C0041331	T047	Disease or Syndrome	C0026926	T007	Bacterium
C0041331	T047	Disease or Syndrome	C1032649	T007	Bacterium
C0041332	T047	Disease or Syndrome	C0026926	T007	Bacterium
C0041332	T047	Disease or Syndrome	C1032649	T007	Bacterium
C0041332	T047	Disease or Syndrome	C0026912	T007	Bacterium
C0041333	T047	Disease or Syndrome	C0026926	T007	Bacterium
C0041333	T047	Disease or Syndrome	C1032649	T007	Bacterium
C0041333	T047	Disease or Syndrome	C0026912	T007	Bacterium
C0041336	T047	Disease or Syndrome	C0026912	T007	Bacterium
C0041336	T047	Disease or Syndrome	C0026926	T007	Bacterium
C0041336	T047	Disease or Syndrome	C1032649	T007	Bacterium
C0041343	T047	Disease or Syndrome	C0004611	T007	Bacterium
C0041351	T047	Disease or Syndrome	C0016677	T007	Bacterium
C0041351	T047	Disease or Syndrome	C0018150	T007	Bacterium
C0041466	T047	Disease or Syndrome	C0004611	T007	Bacterium
C0041466	T047	Disease or Syndrome	C0036125	T007	Bacterium
C0041471	T047	Disease or Syndrome	C0035583	T007	Bacterium
C0041471	T047	Disease or Syndrome	C0314752	T007	Bacterium
C0041471	T047	Disease or Syndrome	C0522411	T007	Bacterium
C0041471	T047	Disease or Syndrome	C1441158	T007	Bacterium
C0041472	T047	Disease or Syndrome	C0314752	T007	Bacterium
C0041472	T047	Disease or Syndrome	C1010467	T007	Bacterium
C0041472	T047	Disease or Syndrome	C0018150	T007	Bacterium
C0041472	T047	Disease or Syndrome	C0035590	T007	Bacterium
C0041472	T047	Disease or Syndrome	C0035596	T007	Bacterium
C0041472	T047	Disease or Syndrome	C0522411	T007	Bacterium
C0041473	T047	Disease or Syndrome	C0018150	T007	Bacterium
C0041473	T047	Disease or Syndrome	C0035587	T007	Bacterium
C0041473	T047	Disease or Syndrome	C0035596	T007	Bacterium
C0041473	T047	Disease or Syndrome	C0314752	T007	Bacterium
C0041473	T047	Disease or Syndrome	C0522411	T007	Bacterium
C0041593	T047	Disease or Syndrome	C0004613	T007	Bacterium
C0041593	T047	Disease or Syndrome	C0004611	T007	Bacterium
C0042214	T047	Disease or Syndrome	C0032868	T005	Virus
C0042214	T047	Disease or Syndrome	C0042216	T005	Virus
C0042215	T047	Disease or Syndrome	C0032868	T005	Virus
C0042215	T047	Disease or Syndrome	C0042216	T005	Virus
C0042217	T047	Disease or Syndrome	C0032868	T005	Virus
C0042217	T047	Disease or Syndrome	C0042216	T005	Virus
C0042470	T047	Disease or Syndrome	C0206497	T005	Virus
C0042470	T047	Disease or Syndrome	C0589088	T005	Virus
C0042548	T047	Disease or Syndrome	C0021344	T005	Virus
C0042548	T047	Disease or Syndrome	C0030358	T005	Virus
C0042548	T047	Disease or Syndrome	C0042776	T005	Virus
C0042552	T047	Disease or Syndrome	C0004770	T007	Bacterium
C0042552	T047	Disease or Syndrome	C0314752	T007	Bacterium
C0042552	T047	Disease or Syndrome	C0318324	T007	Bacterium
C0042584	T047	Disease or Syndrome	C0162334	T005	Virus
C0042586	T047	Disease or Syndrome	C0035414	T005	Virus
C0042586	T047	Disease or Syndrome	C0042587	T005	Virus
C0042636	T047	Disease or Syndrome	C0018150	T007	Bacterium
C0042636	T047	Disease or Syndrome	C0042628	T007	Bacterium
C0042708	T047	Disease or Syndrome	C0042776	T005	Virus
C0042721	T047	Disease or Syndrome	C0042776	T005	Virus
C0042734	T047	Disease or Syndrome	C0042776	T005	Virus
C0042749	T047	Disease or Syndrome	C0042776	T005	Virus
C0042769	T047	Disease or Syndrome	C0042776	T005	Virus
C0042904	T047	Disease or Syndrome	C0004611	T007	Bacterium
C0043037	T047	Disease or Syndrome	C0021344	T005	Virus
C0043037	T047	Disease or Syndrome	C0030358	T005	Virus
C0043037	T047	Disease or Syndrome	C0042776	T005	Virus
C0043102	T047	Disease or Syndrome	C0023360	T007	Bacterium
C0043102	T047	Disease or Syndrome	C0004611	T007	Bacterium
C0043102	T047	Disease or Syndrome	C0023358	T007	Bacterium
C0043102	T047	Disease or Syndrome	C0037973	T007	Bacterium
C0043124	T047	Disease or Syndrome	C0040360	T005	Virus
C0043124	T047	Disease or Syndrome	C0043125	T005	Virus
C0043124	T047	Disease or Syndrome	C0016215	T005	Virus
C0043167	T047	Disease or Syndrome	C0006017	T007	Bacterium
C0043167	T047	Disease or Syndrome	C0300959	T007	Bacterium
C0043168	T047	Disease or Syndrome	C0006017	T007	Bacterium
C0043168	T047	Disease or Syndrome	C0300959	T007	Bacterium
C0043170	T047	Disease or Syndrome	C0006013	T007	Bacterium
C0043388	T047	Disease or Syndrome	C0004611	T007	Bacterium
C0043388	T047	Disease or Syndrome	C0040842	T007	Bacterium
C0043395	T047	Disease or Syndrome	C0003755	T005	Virus
C0043395	T047	Disease or Syndrome	C0006395	T005	Virus
C0043395	T047	Disease or Syndrome	C0040360	T005	Virus
C0043395	T047	Disease or Syndrome	C0043396	T005	Virus
C0043395	T047	Disease or Syndrome	C0206532	T005	Virus
C0043395	T047	Disease or Syndrome	C0042776	T005	Virus
C0043397	T047	Disease or Syndrome	C0003755	T005	Virus
C0043397	T047	Disease or Syndrome	C0006395	T005	Virus
C0043397	T047	Disease or Syndrome	C0040360	T005	Virus
C0043397	T047	Disease or Syndrome	C0042776	T005	Virus
C0043397	T047	Disease or Syndrome	C0043396	T005	Virus
C0043397	T047	Disease or Syndrome	C0206532	T005	Virus
C0043398	T047	Disease or Syndrome	C0003755	T005	Virus
C0043398	T047	Disease or Syndrome	C0006395	T005	Virus
C0043398	T047	Disease or Syndrome	C0040360	T005	Virus
C0043398	T047	Disease or Syndrome	C0042776	T005	Virus
C0043398	T047	Disease or Syndrome	C0043396	T005	Virus
C0043398	T047	Disease or Syndrome	C0206532	T005	Virus
C0043407	T047	Disease or Syndrome	C0043405	T007	Bacterium
C0043410	T047	Disease or Syndrome	C0043409	T007	Bacterium
C0043541	T047	Disease or Syndrome	C0016832	T004	Fungus
C0043541	T047	Disease or Syndrome	C0319495	T004	Fungus
C0078911	T047	Disease or Syndrome	C0019682	T005	Virus
C0078911	T047	Disease or Syndrome	C0079679	T005	Virus
C0079335	T047	Disease or Syndrome	C0079337	T005	Virus
C0079680	T047	Disease or Syndrome	C0035366	T005	Virus
C0079680	T047	Disease or Syndrome	C0079679	T005	Virus
C0080040	T047	Disease or Syndrome	C0014383	T005	Virus
C0080040	T047	Disease or Syndrome	C0031886	T005	Virus
C0080040	T047	Disease or Syndrome	C0206435	T005	Virus
C0080151	T047	Disease or Syndrome	C0037224	T005	Virus
C0085082	T047	Disease or Syndrome	C0016832	T004	Fungus
C0085164	T191	Neoplastic Process	C0015767	T005	Virus
C0085164	T191	Neoplastic Process	C0079936	T005	Virus
C0085165	T191	Neoplastic Process	C0079936	T005	Virus
C0085165	T191	Neoplastic Process	C0319084	T005	Virus
C0085166	T047	Disease or Syndrome	C0004611	T007	Bacterium
C0085209	T047	Disease or Syndrome	C0318357	T005	Virus
C0085222	T047	Disease or Syndrome	C0004611	T007	Bacterium
C0085273	T047	Disease or Syndrome	C0042776	T005	Virus
C0085273	T047	Disease or Syndrome	C0085274	T005	Virus
C0085293	T047	Disease or Syndrome	C0085294	T005	Virus
C0085306	T047	Disease or Syndrome	C0085305	T005	Virus
C0085388	T047	Disease or Syndrome	C0026926	T007	Bacterium
C0085388	T047	Disease or Syndrome	C1032649	T007	Bacterium
C0085388	T047	Disease or Syndrome	C0026912	T007	Bacterium
C0085394	T047	Disease or Syndrome	C0036765	T007	Bacterium
C0085399	T047	Disease or Syndrome	C0013722	T007	Bacterium
C0085399	T047	Disease or Syndrome	C0018150	T007	Bacterium
C0085399	T047	Disease or Syndrome	C0035596	T007	Bacterium
C0085399	T047	Disease or Syndrome	C0314752	T007	Bacterium
C0085407	T047	Disease or Syndrome	C0085345	T004	Fungus
C0085412	T047	Disease or Syndrome	C0085345	T004	Fungus
C0085412	T047	Disease or Syndrome	C0085350	T004	Fungus
C0085412	T047	Disease or Syndrome	C1001839	T004	Fungus
C0085423	T047	Disease or Syndrome	C0018150	T007	Bacterium
C0085434	T047	Disease or Syndrome	C0004611	T007	Bacterium
C0085434	T047	Disease or Syndrome	C0004770	T007	Bacterium
C0085434	T047	Disease or Syndrome	C0035583	T007	Bacterium
C0085434	T047	Disease or Syndrome	C0035791	T007	Bacterium
C0085434	T047	Disease or Syndrome	C0314752	T007	Bacterium
C0085436	T047	Disease or Syndrome	C0010415	T004	Fungus
C0085436	T047	Disease or Syndrome	C0010416	T004	Fungus
C0085436	T047	Disease or Syndrome	C0011746	T004	Fungus
C0085436	T047	Disease or Syndrome	C0016832	T004	Fungus
C0085437	T047	Disease or Syndrome	C0004611	T007	Bacterium
C0085438	T047	Disease or Syndrome	C0016832	T004	Fungus
C0085568	T047	Disease or Syndrome	C0004611	T007	Bacterium
C0085568	T047	Disease or Syndrome	C0317759	T007	Bacterium
C0085568	T047	Disease or Syndrome	C1265234	T007	Bacterium
C0085652	T047	Disease or Syndrome	C0004611	T007	Bacterium
C0085659	T047	Disease or Syndrome	C0038411	T007	Bacterium
C0085819	T047	Disease or Syndrome	C0079134	T007	Bacterium
C0085859	T047	Disease or Syndrome	C0006836	T004	Fungus
C0085859	T047	Disease or Syndrome	C0011746	T004	Fungus
C0086544	T047	Disease or Syndrome	C0026912	T007	Bacterium
C0086544	T047	Disease or Syndrome	C0026922	T007	Bacterium
C0087073	T047	Disease or Syndrome	C0318451	T005	Virus
C0149522	T047	Disease or Syndrome	C0004611	T007	Bacterium
C0149678	T047	Disease or Syndrome	C0019369	T005	Virus
C0149678	T047	Disease or Syndrome	C0014644	T005	Virus
C0149770	T046	Pathologic Function	C0004611	T007	Bacterium
C0149777	T046	Pathologic Function	C0004611	T007	Bacterium
C0149816	T046	Pathologic Function	C0004611	T007	Bacterium
C0149892	T046	Pathologic Function	C0004611	T007	Bacterium
C0149965	T047	Disease or Syndrome	C0008148	T007	Bacterium
C0149965	T047	Disease or Syndrome	C0008150	T007	Bacterium
C0149966	T047	Disease or Syndrome	C0027573	T007	Bacterium
C0149967	T047	Disease or Syndrome	C0018150	T007	Bacterium
C0149967	T047	Disease or Syndrome	C0026934	T007	Bacterium
C0149985	T047	Disease or Syndrome	C0004611	T007	Bacterium
C0149985	T047	Disease or Syndrome	C0040840	T007	Bacterium
C0150005	T047	Disease or Syndrome	C0042776	T005	Virus
C0151175	T047	Disease or Syndrome	C0004611	T007	Bacterium
C0151175	T047	Disease or Syndrome	C0027573	T007	Bacterium
C0151328	T047	Disease or Syndrome	C0042776	T005	Virus
C0151332	T047	Disease or Syndrome	C0026912	T007	Bacterium
C0151332	T047	Disease or Syndrome	C1032649	T007	Bacterium
C0151463	T047	Disease or Syndrome	C0004611	T007	Bacterium
C0151465	T020	Acquired Abnormality	C0004611	T007	Bacterium
C0151874	T047	Disease or Syndrome	C0016832	T004	Fungus
C0152061	T047	Disease or Syndrome	C0004611	T007	Bacterium
C0152061	T047	Disease or Syndrome	C0006033	T007	Bacterium
C0152061	T047	Disease or Syndrome	C0037973	T007	Bacterium
C0152061	T047	Disease or Syndrome	C0315000	T007	Bacterium
C0152062	T047	Disease or Syndrome	C0037973	T007	Bacterium
C0152062	T047	Disease or Syndrome	C0318099	T007	Bacterium
C0152062	T047	Disease or Syndrome	C0318138	T007	Bacterium
C0152063	T047	Disease or Syndrome	C0037973	T007	Bacterium
C0152063	T047	Disease or Syndrome	C0318099	T007	Bacterium
C0152063	T047	Disease or Syndrome	C0318138	T007	Bacterium
C0152063	T047	Disease or Syndrome	C0699955	T007	Bacterium
C0152066	T047	Disease or Syndrome	C1622980	T004	Fungus
C0152066	T047	Disease or Syndrome	C0011746	T004	Fungus
C0152066	T047	Disease or Syndrome	C0016832	T004	Fungus
C0152067	T047	Disease or Syndrome	C0011635	T004	Fungus
C0152067	T047	Disease or Syndrome	C0008886	T004	Fungus
C0152067	T047	Disease or Syndrome	C0008889	T004	Fungus
C0152067	T047	Disease or Syndrome	C0016832	T004	Fungus
C0152084	T047	Disease or Syndrome	C0038402	T007	Bacterium
C0152108	T047	Disease or Syndrome	C0446075	T004	Fungus
C0152108	T047	Disease or Syndrome	C0589028	T004	Fungus
C0152113	T047	Disease or Syndrome	C0038411	T007	Bacterium
C0152413	T047	Disease or Syndrome	C0206545	T005	Virus
C0152413	T047	Disease or Syndrome	C0042776	T005	Virus
C0152448	T046	Pathologic Function	C0004611	T007	Bacterium
C0152450	T047	Disease or Syndrome	C0038402	T007	Bacterium
C0152485	T047	Disease or Syndrome	C0036111	T007	Bacterium
C0152486	T047	Disease or Syndrome	C0036111	T007	Bacterium
C0152487	T047	Disease or Syndrome	C0036111	T007	Bacterium
C0152488	T047	Disease or Syndrome	C0004611	T007	Bacterium
C0152488	T047	Disease or Syndrome	C0036111	T007	Bacterium
C0152489	T047	Disease or Syndrome	C0004611	T007	Bacterium
C0152489	T047	Disease or Syndrome	C0036111	T007	Bacterium
C0152490	T047	Disease or Syndrome	C0004611	T007	Bacterium
C0152490	T047	Disease or Syndrome	C0036111	T007	Bacterium
C0152491	T047	Disease or Syndrome	C0036111	T007	Bacterium
C0152492	T047	Disease or Syndrome	C0036111	T007	Bacterium
C0152493	T047	Disease or Syndrome	C0036953	T007	Bacterium
C0152497	T047	Disease or Syndrome	C0004611	T007	Bacterium
C0152497	T047	Disease or Syndrome	C0042637	T007	Bacterium
C0152498	T037	Injury or Poisoning	C0004611	T007	Bacterium
C0152502	T047	Disease or Syndrome	C0004611	T007	Bacterium
C0152503	T047	Disease or Syndrome	C0004611	T007	Bacterium
C0152515	T047	Disease or Syndrome	C0004611	T007	Bacterium
C0152515	T047	Disease or Syndrome	C0033808	T007	Bacterium
C0152515	T047	Disease or Syndrome	C0033809	T007	Bacterium
C0152516	T047	Disease or Syndrome	C0004611	T007	Bacterium
C0152517	T047	Disease or Syndrome	C0042776	T005	Virus
C0152524	T047	Disease or Syndrome	C0026912	T007	Bacterium
C0152524	T047	Disease or Syndrome	C0026926	T007	Bacterium
C0152524	T047	Disease or Syndrome	C1032649	T007	Bacterium
C0152531	T047	Disease or Syndrome	C0026926	T007	Bacterium
C0152531	T047	Disease or Syndrome	C1032649	T007	Bacterium
C0152531	T047	Disease or Syndrome	C0026912	T007	Bacterium
C0152538	T047	Disease or Syndrome	C0026926	T007	Bacterium
C0152538	T047	Disease or Syndrome	C1032649	T007	Bacterium
C0152545	T047	Disease or Syndrome	C0026926	T007	Bacterium
C0152545	T047	Disease or Syndrome	C1032649	T007	Bacterium
C0152545	T047	Disease or Syndrome	C0026912	T007	Bacterium
C0152552	T047	Disease or Syndrome	C0026926	T007	Bacterium
C0152552	T047	Disease or Syndrome	C1032649	T007	Bacterium
C0152552	T047	Disease or Syndrome	C0026912	T007	Bacterium
C0152559	T047	Disease or Syndrome	C0026926	T007	Bacterium
C0152559	T047	Disease or Syndrome	C1032649	T007	Bacterium
C0152559	T047	Disease or Syndrome	C0026912	T007	Bacterium
C0152566	T047	Disease or Syndrome	C0026926	T007	Bacterium
C0152566	T047	Disease or Syndrome	C1032649	T007	Bacterium
C0152566	T047	Disease or Syndrome	C0026912	T007	Bacterium
C0152573	T047	Disease or Syndrome	C0026912	T007	Bacterium
C0152573	T047	Disease or Syndrome	C0026926	T007	Bacterium
C0152573	T047	Disease or Syndrome	C1032649	T007	Bacterium
C0152586	T047	Disease or Syndrome	C0026912	T007	Bacterium
C0152586	T047	Disease or Syndrome	C0026926	T007	Bacterium
C0152586	T047	Disease or Syndrome	C1032649	T007	Bacterium
C0152600	T047	Disease or Syndrome	C0026912	T007	Bacterium
C0152600	T047	Disease or Syndrome	C0026926	T007	Bacterium
C0152600	T047	Disease or Syndrome	C1032649	T007	Bacterium
C0152607	T047	Disease or Syndrome	C0026926	T007	Bacterium
C0152607	T047	Disease or Syndrome	C1032649	T007	Bacterium
C0152620	T047	Disease or Syndrome	C0026926	T007	Bacterium
C0152620	T047	Disease or Syndrome	C1032649	T007	Bacterium
C0152627	T047	Disease or Syndrome	C0026926	T007	Bacterium
C0152627	T047	Disease or Syndrome	C1032649	T007	Bacterium
C0152627	T047	Disease or Syndrome	C0026912	T007	Bacterium
C0152634	T047	Disease or Syndrome	C0026926	T007	Bacterium
C0152634	T047	Disease or Syndrome	C1032649	T007	Bacterium
C0152647	T047	Disease or Syndrome	C0026926	T007	Bacterium
C0152647	T047	Disease or Syndrome	C1032649	T007	Bacterium
C0152654	T047	Disease or Syndrome	C0026926	T007	Bacterium
C0152654	T047	Disease or Syndrome	C1032649	T007	Bacterium
C0152661	T047	Disease or Syndrome	C0026912	T007	Bacterium
C0152661	T047	Disease or Syndrome	C0026926	T007	Bacterium
C0152661	T047	Disease or Syndrome	C1032649	T007	Bacterium
C0152696	T047	Disease or Syndrome	C0026926	T007	Bacterium
C0152696	T047	Disease or Syndrome	C1032649	T007	Bacterium
C0152696	T047	Disease or Syndrome	C0004611	T007	Bacterium
C0152696	T047	Disease or Syndrome	C0026912	T007	Bacterium
C0152703	T047	Disease or Syndrome	C0026926	T007	Bacterium
C0152703	T047	Disease or Syndrome	C1032649	T007	Bacterium
C0152717	T047	Disease or Syndrome	C0026912	T007	Bacterium
C0152717	T047	Disease or Syndrome	C0026926	T007	Bacterium
C0152717	T047	Disease or Syndrome	C1032649	T007	Bacterium
C0152737	T047	Disease or Syndrome	C0026926	T007	Bacterium
C0152737	T047	Disease or Syndrome	C1032649	T007	Bacterium
C0152744	T047	Disease or Syndrome	C0004611	T007	Bacterium
C0152744	T047	Disease or Syndrome	C0026926	T007	Bacterium
C0152744	T047	Disease or Syndrome	C1032649	T007	Bacterium
C0152765	T047	Disease or Syndrome	C0026926	T007	Bacterium
C0152765	T047	Disease or Syndrome	C1032649	T007	Bacterium
C0152772	T047	Disease or Syndrome	C0026926	T007	Bacterium
C0152772	T047	Disease or Syndrome	C1032649	T007	Bacterium
C0152793	T047	Disease or Syndrome	C0026912	T007	Bacterium
C0152793	T047	Disease or Syndrome	C0026926	T007	Bacterium
C0152793	T047	Disease or Syndrome	C1032649	T007	Bacterium
C0152800	T047	Disease or Syndrome	C0026912	T007	Bacterium
C0152800	T047	Disease or Syndrome	C0026926	T007	Bacterium
C0152800	T047	Disease or Syndrome	C1032649	T007	Bacterium
C0152814	T047	Disease or Syndrome	C0026912	T007	Bacterium
C0152814	T047	Disease or Syndrome	C0026926	T007	Bacterium
C0152814	T047	Disease or Syndrome	C1032649	T007	Bacterium
C0152821	T047	Disease or Syndrome	C0026926	T007	Bacterium
C0152821	T047	Disease or Syndrome	C1032649	T007	Bacterium
C0152828	T047	Disease or Syndrome	C0026926	T007	Bacterium
C0152828	T047	Disease or Syndrome	C1032649	T007	Bacterium
C0152828	T047	Disease or Syndrome	C0026912	T007	Bacterium
C0152835	T047	Disease or Syndrome	C0026926	T007	Bacterium
C0152835	T047	Disease or Syndrome	C1032649	T007	Bacterium
C0152861	T047	Disease or Syndrome	C0026926	T007	Bacterium
C0152861	T047	Disease or Syndrome	C1032649	T007	Bacterium
C0152861	T047	Disease or Syndrome	C0026912	T007	Bacterium
C0152874	T047	Disease or Syndrome	C0026926	T007	Bacterium
C0152874	T047	Disease or Syndrome	C1032649	T007	Bacterium
C0152874	T047	Disease or Syndrome	C0026912	T007	Bacterium
C0152881	T047	Disease or Syndrome	C0026912	T007	Bacterium
C0152881	T047	Disease or Syndrome	C0026926	T007	Bacterium
C0152881	T047	Disease or Syndrome	C1032649	T007	Bacterium
C0152889	T047	Disease or Syndrome	C0026912	T007	Bacterium
C0152889	T047	Disease or Syndrome	C0026926	T007	Bacterium
C0152889	T047	Disease or Syndrome	C1032649	T007	Bacterium
C0152902	T047	Disease or Syndrome	C0026912	T007	Bacterium
C0152902	T047	Disease or Syndrome	C0026926	T007	Bacterium
C0152902	T047	Disease or Syndrome	C1032649	T007	Bacterium
C0152915	T047	Disease or Syndrome	C0026926	T007	Bacterium
C0152915	T047	Disease or Syndrome	C1032649	T007	Bacterium
C0152915	T047	Disease or Syndrome	C0026912	T007	Bacterium
C0152922	T047	Disease or Syndrome	C0026926	T007	Bacterium
C0152922	T047	Disease or Syndrome	C1032649	T007	Bacterium
C0152935	T047	Disease or Syndrome	C0004611	T007	Bacterium
C0152935	T047	Disease or Syndrome	C0043405	T007	Bacterium
C0152935	T047	Disease or Syndrome	C0043408	T007	Bacterium
C0152936	T047	Disease or Syndrome	C0018150	T007	Bacterium
C0152936	T047	Disease or Syndrome	C0043405	T007	Bacterium
C0152936	T047	Disease or Syndrome	C0043408	T007	Bacterium
C0152937	T047	Disease or Syndrome	C0043405	T007	Bacterium
C0152937	T047	Disease or Syndrome	C0043408	T007	Bacterium
C0152938	T047	Disease or Syndrome	C0043405	T007	Bacterium
C0152938	T047	Disease or Syndrome	C0043408	T007	Bacterium
C0152940	T047	Disease or Syndrome	C0043408	T007	Bacterium
C0152941	T047	Disease or Syndrome	C0004611	T007	Bacterium
C0152941	T047	Disease or Syndrome	C0016677	T007	Bacterium
C0152941	T047	Disease or Syndrome	C0018150	T007	Bacterium
C0152942	T047	Disease or Syndrome	C0016677	T007	Bacterium
C0152942	T047	Disease or Syndrome	C0018150	T007	Bacterium
C0152944	T047	Disease or Syndrome	C0004611	T007	Bacterium
C0152944	T047	Disease or Syndrome	C0016677	T007	Bacterium
C0152944	T047	Disease or Syndrome	C0018150	T007	Bacterium
C0152945	T047	Disease or Syndrome	C0004589	T007	Bacterium
C0152945	T047	Disease or Syndrome	C0004611	T007	Bacterium
C0152946	T047	Disease or Syndrome	C0004589	T007	Bacterium
C0152947	T047	Disease or Syndrome	C0004589	T007	Bacterium
C0152948	T047	Disease or Syndrome	C0004611	T007	Bacterium
C0152948	T047	Disease or Syndrome	C0042776	T005	Virus
C0152949	T047	Disease or Syndrome	C0004611	T007	Bacterium
C0152949	T047	Disease or Syndrome	C0042776	T005	Virus
C0152951	T047	Disease or Syndrome	C0026912	T007	Bacterium
C0152952	T047	Disease or Syndrome	C0010150	T007	Bacterium
C0152952	T047	Disease or Syndrome	C1301419	T007	Bacterium
C0152953	T047	Disease or Syndrome	C0004611	T007	Bacterium
C0152953	T047	Disease or Syndrome	C0010150	T007	Bacterium
C0152953	T047	Disease or Syndrome	C1301419	T007	Bacterium
C0152954	T047	Disease or Syndrome	C0010150	T007	Bacterium
C0152954	T047	Disease or Syndrome	C1301419	T007	Bacterium
C0152957	T047	Disease or Syndrome	C0004611	T007	Bacterium
C0152957	T047	Disease or Syndrome	C0027575	T007	Bacterium
C0152957	T047	Disease or Syndrome	C0314754	T007	Bacterium
C0152958	T047	Disease or Syndrome	C0027575	T007	Bacterium
C0152958	T047	Disease or Syndrome	C0314754	T007	Bacterium
C0152959	T047	Disease or Syndrome	C0027575	T007	Bacterium
C0152960	T047	Disease or Syndrome	C0027575	T007	Bacterium
C0152960	T047	Disease or Syndrome	C0314754	T007	Bacterium
C0152961	T047	Disease or Syndrome	C0027575	T007	Bacterium
C0152961	T047	Disease or Syndrome	C0314754	T007	Bacterium
C0152962	T047	Disease or Syndrome	C0027575	T007	Bacterium
C0152962	T047	Disease or Syndrome	C0314754	T007	Bacterium
C0152964	T047	Disease or Syndrome	C0038402	T007	Bacterium
C0152965	T047	Disease or Syndrome	C0038170	T007	Bacterium
C0152966	T047	Disease or Syndrome	C0038410	T007	Bacterium
C0152966	T047	Disease or Syndrome	C0038402	T007	Bacterium
C0152967	T047	Disease or Syndrome	C0004613	T007	Bacterium
C0152972	T047	Disease or Syndrome	C0033808	T007	Bacterium
C0152973	T047	Disease or Syndrome	C0036765	T007	Bacterium
C0152977	T047	Disease or Syndrome	C0004611	T007	Bacterium
C0152993	T047	Disease or Syndrome	C0014383	T005	Virus
C0152993	T047	Disease or Syndrome	C0031886	T005	Virus
C0152993	T047	Disease or Syndrome	C0206435	T005	Virus
C0152998	T047	Disease or Syndrome	C0031886	T005	Virus
C0152998	T047	Disease or Syndrome	C0206435	T005	Virus
C0153012	T047	Disease or Syndrome	C0014383	T005	Virus
C0153013	T047	Disease or Syndrome	C0042776	T005	Virus
C0153016	T047	Disease or Syndrome	C0032868	T005	Virus
C0153016	T047	Disease or Syndrome	C0206583	T005	Virus
C0153017	T047	Disease or Syndrome	C0042338	T005	Virus
C0153017	T047	Disease or Syndrome	C0042776	T005	Virus
C0153017	T047	Disease or Syndrome	C0319232	T005	Virus
C0153018	T047	Disease or Syndrome	C0042338	T005	Virus
C0153018	T047	Disease or Syndrome	C0206559	T005	Virus
C0153019	T047	Disease or Syndrome	C0042338	T005	Virus
C0153024	T047	Disease or Syndrome	C0042338	T005	Virus
C0153025	T047	Disease or Syndrome	C0042338	T005	Virus
C0153025	T047	Disease or Syndrome	C0206557	T005	Virus
C0153025	T047	Disease or Syndrome	C0319231	T005	Virus
C0153027	T047	Disease or Syndrome	C0042338	T005	Virus
C0153028	T047	Disease or Syndrome	C0042338	T005	Virus
C0153030	T047	Disease or Syndrome	C0042338	T005	Virus
C0153031	T047	Disease or Syndrome	C0042338	T005	Virus
C0153033	T047	Disease or Syndrome	C0019369	T005	Virus
C0153033	T047	Disease or Syndrome	C0319231	T005	Virus
C0153033	T047	Disease or Syndrome	C0319232	T005	Virus
C0153034	T047	Disease or Syndrome	C0319231	T005	Virus
C0153034	T047	Disease or Syndrome	C0319232	T005	Virus
C0153037	T047	Disease or Syndrome	C0319231	T005	Virus
C0153037	T047	Disease or Syndrome	C0319232	T005	Virus
C0153038	T047	Disease or Syndrome	C0319231	T005	Virus
C0153038	T047	Disease or Syndrome	C0319232	T005	Virus
C0153039	T047	Disease or Syndrome	C0319231	T005	Virus
C0153039	T047	Disease or Syndrome	C0319232	T005	Virus
C0153041	T047	Disease or Syndrome	C0319231	T005	Virus
C0153041	T047	Disease or Syndrome	C0319232	T005	Virus
C0153042	T047	Disease or Syndrome	C0319231	T005	Virus
C0153042	T047	Disease or Syndrome	C0319232	T005	Virus
C0153043	T047	Disease or Syndrome	C0319231	T005	Virus
C0153043	T047	Disease or Syndrome	C0319232	T005	Virus
C0153045	T047	Disease or Syndrome	C0019369	T005	Virus
C0153045	T047	Disease or Syndrome	C0042776	T005	Virus
C0153045	T047	Disease or Syndrome	C0319231	T005	Virus
C0153045	T047	Disease or Syndrome	C0319232	T005	Virus
C0153046	T047	Disease or Syndrome	C0319231	T005	Virus
C0153046	T047	Disease or Syndrome	C0319232	T005	Virus
C0153047	T047	Disease or Syndrome	C0319231	T005	Virus
C0153047	T047	Disease or Syndrome	C0319232	T005	Virus
C0153047	T047	Disease or Syndrome	C0019369	T005	Virus
C0153048	T047	Disease or Syndrome	C0025011	T005	Virus
C0153048	T047	Disease or Syndrome	C0042776	T005	Virus
C0153049	T047	Disease or Syndrome	C0025011	T005	Virus
C0153049	T047	Disease or Syndrome	C0030465	T005	Virus
C0153049	T047	Disease or Syndrome	C0042776	T005	Virus
C0153050	T047	Disease or Syndrome	C0042776	T005	Virus
C0153051	T047	Disease or Syndrome	C0025011	T005	Virus
C0153052	T047	Disease or Syndrome	C0025011	T005	Virus
C0153052	T047	Disease or Syndrome	C0030465	T005	Virus
C0153053	T047	Disease or Syndrome	C0025011	T005	Virus
C0153053	T047	Disease or Syndrome	C0030465	T005	Virus
C0153054	T047	Disease or Syndrome	C0035924	T005	Virus
C0153054	T047	Disease or Syndrome	C0040360	T005	Virus
C0153054	T047	Disease or Syndrome	C0042776	T005	Virus
C0153058	T047	Disease or Syndrome	C0035924	T005	Virus
C0153060	T047	Disease or Syndrome	C0035924	T005	Virus
C0153060	T047	Disease or Syndrome	C0040360	T005	Virus
C0153061	T047	Disease or Syndrome	C0042776	T005	Virus
C0153062	T047	Disease or Syndrome	C0042776	T005	Virus
C0153064	T047	Disease or Syndrome	C0014050	T005	Virus
C0153065	T047	Disease or Syndrome	C0014046	T005	Virus
C0153065	T047	Disease or Syndrome	C0042776	T005	Virus
C0153066	T047	Disease or Syndrome	C0026808	T005	Virus
C0153066	T047	Disease or Syndrome	C0040360	T005	Virus
C0153066	T047	Disease or Syndrome	C0042776	T005	Virus
C0153067	T047	Disease or Syndrome	C0003725	T005	Virus
C0153067	T047	Disease or Syndrome	C0042776	T005	Virus
C0153070	T047	Disease or Syndrome	C0003725	T005	Virus
C0153070	T047	Disease or Syndrome	C0042776	T005	Virus
C0153071	T047	Disease or Syndrome	C0003725	T005	Virus
C0153071	T047	Disease or Syndrome	C0003755	T005	Virus
C0153071	T047	Disease or Syndrome	C0006395	T005	Virus
C0153071	T047	Disease or Syndrome	C0040360	T005	Virus
C0153071	T047	Disease or Syndrome	C0206510	T005	Virus
C0153071	T047	Disease or Syndrome	C0206532	T005	Virus
C0153072	T047	Disease or Syndrome	C0003725	T005	Virus
C0153072	T047	Disease or Syndrome	C0042776	T005	Virus
C0153073	T047	Disease or Syndrome	C0003725	T005	Virus
C0153073	T047	Disease or Syndrome	C0042776	T005	Virus
C0153074	T047	Disease or Syndrome	C0003725	T005	Virus
C0153074	T047	Disease or Syndrome	C0042776	T005	Virus
C0153075	T047	Disease or Syndrome	C0376325	T005	Virus
C0153076	T047	Disease or Syndrome	C0019169	T005	Virus
C0153081	T047	Disease or Syndrome	C0042776	T005	Virus
C0153085	T047	Disease or Syndrome	C0042776	T005	Virus
C0153089	T047	Disease or Syndrome	C0042776	T005	Virus
C0153091	T047	Disease or Syndrome	C0026783	T005	Virus
C0153091	T047	Disease or Syndrome	C0206533	T005	Virus
C0153092	T047	Disease or Syndrome	C0026783	T005	Virus
C0153092	T047	Disease or Syndrome	C0042776	T005	Virus
C0153092	T047	Disease or Syndrome	C0206533	T005	Virus
C0153093	T047	Disease or Syndrome	C0026783	T005	Virus
C0153093	T047	Disease or Syndrome	C0042776	T005	Virus
C0153093	T047	Disease or Syndrome	C0206533	T005	Virus
C0153094	T047	Disease or Syndrome	C0026783	T005	Virus
C0153094	T047	Disease or Syndrome	C0206533	T005	Virus
C0153095	T047	Disease or Syndrome	C0026783	T005	Virus
C0153096	T047	Disease or Syndrome	C0026783	T005	Virus
C0153097	T047	Disease or Syndrome	C0026783	T005	Virus
C0153097	T047	Disease or Syndrome	C0206533	T005	Virus
C0153098	T047	Disease or Syndrome	C0026783	T005	Virus
C0153098	T047	Disease or Syndrome	C0206533	T005	Virus
C0153099	T047	Disease or Syndrome	C0004611	T007	Bacterium
C0153099	T047	Disease or Syndrome	C0008148	T007	Bacterium
C0153099	T047	Disease or Syndrome	C0008150	T007	Bacterium
C0153100	T047	Disease or Syndrome	C0008148	T007	Bacterium
C0153100	T047	Disease or Syndrome	C0008150	T007	Bacterium
C0153101	T047	Disease or Syndrome	C0008148	T007	Bacterium
C0153101	T047	Disease or Syndrome	C0008150	T007	Bacterium
C0153103	T047	Disease or Syndrome	C1331054	T005	Virus
C0153103	T047	Disease or Syndrome	C0031886	T005	Virus
C0153103	T047	Disease or Syndrome	C0014383	T005	Virus
C0153104	T047	Disease or Syndrome	C1331054	T005	Virus
C0153105	T047	Disease or Syndrome	C0031886	T005	Virus
C0153105	T047	Disease or Syndrome	C1331054	T005	Virus
C0153106	T047	Disease or Syndrome	C0031886	T005	Virus
C0153106	T047	Disease or Syndrome	C1331054	T005	Virus
C0153107	T047	Disease or Syndrome	C0008151	T007	Bacterium
C0153108	T047	Disease or Syndrome	C0008151	T007	Bacterium
C0153112	T047	Disease or Syndrome	C0206497	T005	Virus
C0153116	T047	Disease or Syndrome	C0035583	T007	Bacterium
C0153116	T047	Disease or Syndrome	C0314752	T007	Bacterium
C0153116	T047	Disease or Syndrome	C0522411	T007	Bacterium
C0153116	T047	Disease or Syndrome	C1441158	T007	Bacterium
C0153117	T047	Disease or Syndrome	C0035583	T007	Bacterium
C0153117	T047	Disease or Syndrome	C0314752	T007	Bacterium
C0153117	T047	Disease or Syndrome	C0042776	T005	Virus
C0153118	T047	Disease or Syndrome	C0035583	T007	Bacterium
C0153118	T047	Disease or Syndrome	C0042776	T005	Virus
C0153118	T047	Disease or Syndrome	C0314752	T007	Bacterium
C0153119	T047	Disease or Syndrome	C0035583	T007	Bacterium
C0153119	T047	Disease or Syndrome	C0314752	T007	Bacterium
C0153120	T047	Disease or Syndrome	C0035583	T007	Bacterium
C0153120	T047	Disease or Syndrome	C0314752	T007	Bacterium
C0153129	T047	Disease or Syndrome	C0004611	T007	Bacterium
C0153129	T047	Disease or Syndrome	C0040840	T007	Bacterium
C0153131	T047	Disease or Syndrome	C0004611	T007	Bacterium
C0153131	T047	Disease or Syndrome	C0040840	T007	Bacterium
C0153132	T047	Disease or Syndrome	C0040840	T007	Bacterium
C0153132	T047	Disease or Syndrome	C0004611	T007	Bacterium
C0153133	T047	Disease or Syndrome	C0004611	T007	Bacterium
C0153133	T047	Disease or Syndrome	C0040840	T007	Bacterium
C0153134	T047	Disease or Syndrome	C0004611	T007	Bacterium
C0153134	T047	Disease or Syndrome	C0040840	T007	Bacterium
C0153136	T047	Disease or Syndrome	C0004611	T007	Bacterium
C0153136	T047	Disease or Syndrome	C0040840	T007	Bacterium
C0153139	T047	Disease or Syndrome	C0040840	T007	Bacterium
C0153139	T047	Disease or Syndrome	C0004611	T007	Bacterium
C0153140	T047	Disease or Syndrome	C0004611	T007	Bacterium
C0153140	T047	Disease or Syndrome	C0040840	T007	Bacterium
C0153141	T047	Disease or Syndrome	C0004611	T007	Bacterium
C0153141	T047	Disease or Syndrome	C0040840	T007	Bacterium
C0153145	T047	Disease or Syndrome	C0004611	T007	Bacterium
C0153145	T047	Disease or Syndrome	C0040840	T007	Bacterium
C0153146	T047	Disease or Syndrome	C0004611	T007	Bacterium
C0153146	T047	Disease or Syndrome	C0040840	T007	Bacterium
C0153148	T047	Disease or Syndrome	C0004611	T007	Bacterium
C0153148	T047	Disease or Syndrome	C0040840	T007	Bacterium
C0153149	T047	Disease or Syndrome	C0004611	T007	Bacterium
C0153149	T047	Disease or Syndrome	C0040840	T007	Bacterium
C0153151	T047	Disease or Syndrome	C0040840	T007	Bacterium
C0153151	T047	Disease or Syndrome	C0004611	T007	Bacterium
C0153156	T047	Disease or Syndrome	C0004611	T007	Bacterium
C0153156	T047	Disease or Syndrome	C0040840	T007	Bacterium
C0153158	T047	Disease or Syndrome	C0004611	T007	Bacterium
C0153158	T047	Disease or Syndrome	C0040840	T007	Bacterium
C0153160	T047	Disease or Syndrome	C0004611	T007	Bacterium
C0153160	T047	Disease or Syndrome	C0040840	T007	Bacterium
C0153161	T047	Disease or Syndrome	C0004611	T007	Bacterium
C0153161	T047	Disease or Syndrome	C0040840	T007	Bacterium
C0153162	T047	Disease or Syndrome	C0004611	T007	Bacterium
C0153162	T047	Disease or Syndrome	C0040840	T007	Bacterium
C0153163	T047	Disease or Syndrome	C0004611	T007	Bacterium
C0153163	T047	Disease or Syndrome	C0040840	T007	Bacterium
C0153164	T047	Disease or Syndrome	C0004611	T007	Bacterium
C0153164	T047	Disease or Syndrome	C0040840	T007	Bacterium
C0153165	T047	Disease or Syndrome	C0004611	T007	Bacterium
C0153165	T047	Disease or Syndrome	C0040840	T007	Bacterium
C0153166	T047	Disease or Syndrome	C0004611	T007	Bacterium
C0153166	T047	Disease or Syndrome	C0040840	T007	Bacterium
C0153167	T047	Disease or Syndrome	C0004611	T007	Bacterium
C0153167	T047	Disease or Syndrome	C0040840	T007	Bacterium
C0153168	T047	Disease or Syndrome	C0004611	T007	Bacterium
C0153168	T047	Disease or Syndrome	C0040840	T007	Bacterium
C0153169	T047	Disease or Syndrome	C0004611	T007	Bacterium
C0153169	T047	Disease or Syndrome	C0040840	T007	Bacterium
C0153170	T047	Disease or Syndrome	C0004611	T007	Bacterium
C0153170	T047	Disease or Syndrome	C0040840	T007	Bacterium
C0153171	T047	Disease or Syndrome	C0004611	T007	Bacterium
C0153171	T047	Disease or Syndrome	C0040840	T007	Bacterium
C0153172	T047	Disease or Syndrome	C0004611	T007	Bacterium
C0153172	T047	Disease or Syndrome	C0040840	T007	Bacterium
C0153173	T047	Disease or Syndrome	C0004611	T007	Bacterium
C0153173	T047	Disease or Syndrome	C0040840	T007	Bacterium
C0153174	T047	Disease or Syndrome	C0040840	T007	Bacterium
C0153176	T047	Disease or Syndrome	C0004611	T007	Bacterium
C0153176	T047	Disease or Syndrome	C0040840	T007	Bacterium
C0153177	T047	Disease or Syndrome	C0040840	T007	Bacterium
C0153177	T047	Disease or Syndrome	C0004611	T007	Bacterium
C0153178	T047	Disease or Syndrome	C0004611	T007	Bacterium
C0153178	T047	Disease or Syndrome	C0040840	T007	Bacterium
C0153179	T047	Disease or Syndrome	C0004611	T007	Bacterium
C0153179	T047	Disease or Syndrome	C0040840	T007	Bacterium
C0153180	T047	Disease or Syndrome	C0004611	T007	Bacterium
C0153180	T047	Disease or Syndrome	C0040840	T007	Bacterium
C0153181	T047	Disease or Syndrome	C0004611	T007	Bacterium
C0153181	T047	Disease or Syndrome	C0040840	T007	Bacterium
C0153182	T047	Disease or Syndrome	C0004611	T007	Bacterium
C0153182	T047	Disease or Syndrome	C0040840	T007	Bacterium
C0153183	T047	Disease or Syndrome	C0004611	T007	Bacterium
C0153183	T047	Disease or Syndrome	C0040840	T007	Bacterium
C0153185	T047	Disease or Syndrome	C0004611	T007	Bacterium
C0153185	T047	Disease or Syndrome	C0040840	T007	Bacterium
C0153186	T047	Disease or Syndrome	C0004611	T007	Bacterium
C0153186	T047	Disease or Syndrome	C0040840	T007	Bacterium
C0153188	T047	Disease or Syndrome	C0004611	T007	Bacterium
C0153188	T047	Disease or Syndrome	C0040840	T007	Bacterium
C0153191	T047	Disease or Syndrome	C0027573	T007	Bacterium
C0153192	T047	Disease or Syndrome	C0027573	T007	Bacterium
C0153193	T047	Disease or Syndrome	C0027573	T007	Bacterium
C0153194	T047	Disease or Syndrome	C0027573	T007	Bacterium
C0153195	T047	Disease or Syndrome	C0027573	T007	Bacterium
C0153196	T047	Disease or Syndrome	C0027573	T007	Bacterium
C0153202	T047	Disease or Syndrome	C0027573	T007	Bacterium
C0153203	T047	Disease or Syndrome	C0027573	T007	Bacterium
C0153204	T047	Disease or Syndrome	C0027573	T007	Bacterium
C0153205	T047	Disease or Syndrome	C0027573	T007	Bacterium
C0153206	T047	Disease or Syndrome	C0027573	T007	Bacterium
C0153207	T047	Disease or Syndrome	C0027573	T007	Bacterium
C0153208	T047	Disease or Syndrome	C0027573	T007	Bacterium
C0153210	T047	Disease or Syndrome	C0027573	T007	Bacterium
C0153212	T047	Disease or Syndrome	C0027573	T007	Bacterium
C0153213	T047	Disease or Syndrome	C0027573	T007	Bacterium
C0153214	T047	Disease or Syndrome	C0027573	T007	Bacterium
C0153216	T047	Disease or Syndrome	C0027573	T007	Bacterium
C0153218	T047	Disease or Syndrome	C0027573	T007	Bacterium
C0153219	T047	Disease or Syndrome	C0004611	T007	Bacterium
C0153219	T047	Disease or Syndrome	C0027573	T007	Bacterium
C0153223	T047	Disease or Syndrome	C0027573	T007	Bacterium
C0153225	T047	Disease or Syndrome	C0027573	T007	Bacterium
C0153226	T047	Disease or Syndrome	C0027573	T007	Bacterium
C0153227	T047	Disease or Syndrome	C0027573	T007	Bacterium
C0153228	T047	Disease or Syndrome	C0027573	T007	Bacterium
C0153231	T047	Disease or Syndrome	C0004611	T007	Bacterium
C0153231	T047	Disease or Syndrome	C0023358	T007	Bacterium
C0153232	T047	Disease or Syndrome	C0004611	T007	Bacterium
C0153232	T047	Disease or Syndrome	C0023358	T007	Bacterium
C0153235	T047	Disease or Syndrome	C0004611	T007	Bacterium
C0153235	T047	Disease or Syndrome	C0040842	T007	Bacterium
C0153239	T047	Disease or Syndrome	C0004611	T007	Bacterium
C0153239	T047	Disease or Syndrome	C0040842	T007	Bacterium
C0153240	T047	Disease or Syndrome	C0004611	T007	Bacterium
C0153240	T047	Disease or Syndrome	C0040842	T007	Bacterium
C0153241	T047	Disease or Syndrome	C0004611	T007	Bacterium
C0153241	T047	Disease or Syndrome	C0037973	T007	Bacterium
C0153241	T047	Disease or Syndrome	C0040838	T007	Bacterium
C0153242	T047	Disease or Syndrome	C0004611	T007	Bacterium
C0153242	T047	Disease or Syndrome	C0037973	T007	Bacterium
C0153242	T047	Disease or Syndrome	C0040838	T007	Bacterium
C0153243	T047	Disease or Syndrome	C0004611	T007	Bacterium
C0153243	T047	Disease or Syndrome	C0037973	T007	Bacterium
C0153243	T047	Disease or Syndrome	C0040838	T007	Bacterium
C0153244	T047	Disease or Syndrome	C0040838	T007	Bacterium
C0153244	T047	Disease or Syndrome	C0004611	T007	Bacterium
C0153244	T047	Disease or Syndrome	C0037973	T007	Bacterium
C0153245	T047	Disease or Syndrome	C0004611	T007	Bacterium
C0153245	T047	Disease or Syndrome	C0037973	T007	Bacterium
C0153245	T047	Disease or Syndrome	C0699955	T007	Bacterium
C0153246	T047	Disease or Syndrome	C0011635	T004	Fungus
C0153246	T047	Disease or Syndrome	C0016832	T004	Fungus
C0153249	T047	Disease or Syndrome	C0011635	T004	Fungus
C0153249	T047	Disease or Syndrome	C0016832	T004	Fungus
C0153249	T047	Disease or Syndrome	C0319613	T004	Fungus
C0153251	T047	Disease or Syndrome	C0006836	T004	Fungus
C0153251	T047	Disease or Syndrome	C0011746	T004	Fungus
C0153252	T047	Disease or Syndrome	C0006836	T004	Fungus
C0153252	T047	Disease or Syndrome	C0011746	T004	Fungus
C0153253	T047	Disease or Syndrome	C0006836	T004	Fungus
C0153253	T047	Disease or Syndrome	C0011746	T004	Fungus
C0153254	T047	Disease or Syndrome	C0006836	T004	Fungus
C0153254	T047	Disease or Syndrome	C0011746	T004	Fungus
C0153255	T047	Disease or Syndrome	C0006836	T004	Fungus
C0153255	T047	Disease or Syndrome	C0016832	T004	Fungus
C0153256	T047	Disease or Syndrome	C0006836	T004	Fungus
C0153256	T047	Disease or Syndrome	C0016832	T004	Fungus
C0153257	T047	Disease or Syndrome	C0009183	T004	Fungus
C0153257	T047	Disease or Syndrome	C0009184	T004	Fungus
C0153257	T047	Disease or Syndrome	C0011746	T004	Fungus
C0153259	T047	Disease or Syndrome	C0009183	T004	Fungus
C0153259	T047	Disease or Syndrome	C0009184	T004	Fungus
C0153259	T047	Disease or Syndrome	C0011746	T004	Fungus
C0153261	T047	Disease or Syndrome	C0011746	T004	Fungus
C0153261	T047	Disease or Syndrome	C0016832	T004	Fungus
C0153261	T047	Disease or Syndrome	C0319941	T004	Fungus
C0153263	T047	Disease or Syndrome	C0016832	T004	Fungus
C0153263	T047	Disease or Syndrome	C0319941	T004	Fungus
C0153264	T047	Disease or Syndrome	C0011746	T004	Fungus
C0153264	T047	Disease or Syndrome	C0016832	T004	Fungus
C0153264	T047	Disease or Syndrome	C0319941	T004	Fungus
C0153265	T047	Disease or Syndrome	C0011746	T004	Fungus
C0153265	T047	Disease or Syndrome	C0016832	T004	Fungus
C0153265	T047	Disease or Syndrome	C0319941	T004	Fungus
C0153266	T047	Disease or Syndrome	C0319941	T004	Fungus
C0153266	T047	Disease or Syndrome	C0011746	T004	Fungus
C0153266	T047	Disease or Syndrome	C0016832	T004	Fungus
C0153271	T047	Disease or Syndrome	C0016832	T004	Fungus
C0153271	T047	Disease or Syndrome	C0319942	T004	Fungus
C0153272	T047	Disease or Syndrome	C0011746	T004	Fungus
C0153272	T047	Disease or Syndrome	C0016832	T004	Fungus
C0153272	T047	Disease or Syndrome	C0319942	T004	Fungus
C0153273	T047	Disease or Syndrome	C0011746	T004	Fungus
C0153273	T047	Disease or Syndrome	C0016832	T004	Fungus
C0153273	T047	Disease or Syndrome	C0319942	T004	Fungus
C0153274	T047	Disease or Syndrome	C0011746	T004	Fungus
C0153274	T047	Disease or Syndrome	C0016832	T004	Fungus
C0153274	T047	Disease or Syndrome	C0319942	T004	Fungus
C0153275	T047	Disease or Syndrome	C0011746	T004	Fungus
C0153275	T047	Disease or Syndrome	C0016832	T004	Fungus
C0153275	T047	Disease or Syndrome	C0319942	T004	Fungus
C0153277	T047	Disease or Syndrome	C0016832	T004	Fungus
C0153277	T047	Disease or Syndrome	C0019653	T004	Fungus
C0153277	T047	Disease or Syndrome	C0319941	T004	Fungus
C0153278	T047	Disease or Syndrome	C0011746	T004	Fungus
C0153278	T047	Disease or Syndrome	C0016832	T004	Fungus
C0153278	T047	Disease or Syndrome	C0319941	T004	Fungus
C0153279	T047	Disease or Syndrome	C0011746	T004	Fungus
C0153279	T047	Disease or Syndrome	C0016832	T004	Fungus
C0153279	T047	Disease or Syndrome	C0019653	T004	Fungus
C0153279	T047	Disease or Syndrome	C0319941	T004	Fungus
C0153281	T047	Disease or Syndrome	C0319941	T004	Fungus
C0153281	T047	Disease or Syndrome	C0019653	T004	Fungus
C0153285	T047	Disease or Syndrome	C0003965	T004	Fungus
C0153285	T047	Disease or Syndrome	C0016832	T004	Fungus
C0153285	T047	Disease or Syndrome	C0391965	T004	Fungus
C0153285	T047	Disease or Syndrome	C1960228	T004	Fungus
C0153329	T046	Pathologic Function	C0026926	T007	Bacterium
C0153331	T046	Pathologic Function	C0026926	T007	Bacterium
C0153331	T046	Pathologic Function	C1032649	T007	Bacterium
C0153333	T046	Pathologic Function	C0026926	T007	Bacterium
C0153333	T046	Pathologic Function	C1032649	T007	Bacterium
C0153334	T046	Pathologic Function	C0026926	T007	Bacterium
C0153337	T046	Pathologic Function	C0042776	T005	Virus
C0153338	T047	Disease or Syndrome	C0008151	T007	Bacterium
C0154200	T047	Disease or Syndrome	C0004611	T007	Bacterium
C0154639	T047	Disease or Syndrome	C0004611	T007	Bacterium
C0154639	T047	Disease or Syndrome	C0038402	T007	Bacterium
C0154640	T047	Disease or Syndrome	C0038170	T007	Bacterium
C0154641	T047	Disease or Syndrome	C0004611	T007	Bacterium
C0154642	T047	Disease or Syndrome	C0004611	T007	Bacterium
C0154654	T047	Disease or Syndrome	C0042776	T005	Virus
C0154660	T047	Disease or Syndrome	C0004611	T007	Bacterium
C0154661	T020	Acquired Abnormality	C0004611	T007	Bacterium
C0155071	T047	Disease or Syndrome	C0016832	T004	Fungus
C0155091	T047	Disease or Syndrome	C0004611	T007	Bacterium
C0155175	T047	Disease or Syndrome	C0004611	T007	Bacterium
C0155393	T047	Disease or Syndrome	C0004611	T007	Bacterium
C0155396	T047	Disease or Syndrome	C0016832	T004	Fungus
C0155440	T047	Disease or Syndrome	C0004611	T007	Bacterium
C0155441	T047	Disease or Syndrome	C0004611	T007	Bacterium
C0155445	T047	Disease or Syndrome	C0004611	T007	Bacterium
C0155506	T047	Disease or Syndrome	C0004611	T007	Bacterium
C0155508	T047	Disease or Syndrome	C0042776	T005	Virus
C0155555	T047	Disease or Syndrome	C0038402	T007	Bacterium
C0155556	T047	Disease or Syndrome	C0038402	T007	Bacterium
C0155557	T047	Disease or Syndrome	C0038402	T007	Bacterium
C0155558	T047	Disease or Syndrome	C0038402	T007	Bacterium
C0155559	T047	Disease or Syndrome	C0038411	T007	Bacterium
C0155561	T047	Disease or Syndrome	C0038402	T007	Bacterium
C0155563	T047	Disease or Syndrome	C0038402	T007	Bacterium
C0155567	T047	Disease or Syndrome	C0038402	T007	Bacterium
C0155568	T047	Disease or Syndrome	C0038402	T007	Bacterium
C0155569	T047	Disease or Syndrome	C0038402	T007	Bacterium
C0155579	T047	Disease or Syndrome	C0038402	T007	Bacterium
C0155582	T047	Disease or Syndrome	C0038402	T007	Bacterium
C0155685	T047	Disease or Syndrome	C0004611	T007	Bacterium
C0155841	T047	Disease or Syndrome	C0004611	T007	Bacterium
C0155842	T047	Disease or Syndrome	C0004611	T007	Bacterium
C0155843	T047	Disease or Syndrome	C0004611	T007	Bacterium
C0155858	T047	Disease or Syndrome	C0004611	T007	Bacterium
C0155860	T047	Disease or Syndrome	C0033808	T007	Bacterium
C0155862	T047	Disease or Syndrome	C0038410	T007	Bacterium
C0155862	T047	Disease or Syndrome	C0038402	T007	Bacterium
C0155865	T047	Disease or Syndrome	C0004611	T007	Bacterium
C0155865	T047	Disease or Syndrome	C0006017	T007	Bacterium
C0155865	T047	Disease or Syndrome	C0300959	T007	Bacterium
C0155866	T047	Disease or Syndrome	C0004589	T007	Bacterium
C0155867	T047	Disease or Syndrome	C0004034	T004	Fungus
C0155867	T047	Disease or Syndrome	C0011746	T004	Fungus
C0155867	T047	Disease or Syndrome	C0016832	T004	Fungus
C0155870	T047	Disease or Syndrome	C0029341	T005	Virus
C0155870	T047	Disease or Syndrome	C0042776	T005	Virus
C0155871	T047	Disease or Syndrome	C0029341	T005	Virus
C0155871	T047	Disease or Syndrome	C0042776	T005	Virus
C0155873	T047	Disease or Syndrome	C0004611	T007	Bacterium
C0155888	T047	Disease or Syndrome	C0004034	T004	Fungus
C0155889	T047	Disease or Syndrome	C0001774	T004	Fungus
C0155889	T047	Disease or Syndrome	C0178863	T007	Bacterium
C0155890	T047	Disease or Syndrome	C0320214	T004	Fungus
C0155908	T047	Disease or Syndrome	C0004611	T007	Bacterium
C0155909	T047	Disease or Syndrome	C0004611	T007	Bacterium
C0155957	T047	Disease or Syndrome	C0004611	T007	Bacterium
C0156178	T047	Disease or Syndrome	C0038410	T007	Bacterium
C0156179	T047	Disease or Syndrome	C0004611	T007	Bacterium
C0156196	T047	Disease or Syndrome	C0042776	T005	Virus
C0156253	T047	Disease or Syndrome	C0004611	T007	Bacterium
C0156278	T047	Disease or Syndrome	C0004611	T007	Bacterium
C0156290	T047	Disease or Syndrome	C0004611	T007	Bacterium
C0156329	T047	Disease or Syndrome	C0004611	T007	Bacterium
C0156338	T047	Disease or Syndrome	C0004611	T007	Bacterium
C0156750	T047	Disease or Syndrome	C0004611	T007	Bacterium
C0156809	T047	Disease or Syndrome	C0035924	T005	Virus
C0156809	T047	Disease or Syndrome	C0040360	T005	Virus
C0157680	T047	Disease or Syndrome	C0004611	T007	Bacterium
C0157690	T047	Disease or Syndrome	C0004611	T007	Bacterium
C0157691	T047	Disease or Syndrome	C0004611	T007	Bacterium
C0157693	T047	Disease or Syndrome	C0004611	T007	Bacterium
C0157695	T047	Disease or Syndrome	C0004611	T007	Bacterium
C0157696	T047	Disease or Syndrome	C0004611	T007	Bacterium
C0157697	T047	Disease or Syndrome	C0004611	T007	Bacterium
C0157698	T047	Disease or Syndrome	C0004611	T007	Bacterium
C0157701	T047	Disease or Syndrome	C0004611	T007	Bacterium
C0157801	T047	Disease or Syndrome	C0042776	T005	Virus
C0158408	T047	Disease or Syndrome	C0206435	T005	Virus
C0158945	T047	Disease or Syndrome	C0010825	T005	Virus
C0158945	T047	Disease or Syndrome	C0205725	T005	Virus
C0158945	T047	Disease or Syndrome	C0206560	T005	Virus
C0162627	T047	Disease or Syndrome	C0004611	T007	Bacterium
C0162628	T047	Disease or Syndrome	C0042776	T005	Virus
C0162644	T047	Disease or Syndrome	C0004611	T007	Bacterium
C0162836	T047	Disease or Syndrome	C0004611	T007	Bacterium
C0175708	T047	Disease or Syndrome	C0038402	T007	Bacterium
C0178240	T047	Disease or Syndrome	C0042776	T005	Virus
C0178244	T047	Disease or Syndrome	C0004611	T007	Bacterium
C0178244	T047	Disease or Syndrome	C0037973	T007	Bacterium
C0178244	T047	Disease or Syndrome	C0699955	T007	Bacterium
C0178496	T037	Injury or Poisoning	C0004611	T007	Bacterium
C0205740	T047	Disease or Syndrome	C0012755	T005	Virus
C0205858	T047	Disease or Syndrome	C0004611	T007	Bacterium
C0205858	T047	Disease or Syndrome	C0040840	T007	Bacterium
C0205882	T047	Disease or Syndrome	C0086776	T005	Virus
C0205882	T047	Disease or Syndrome	C0042776	T005	Virus
C0206019	T047	Disease or Syndrome	C0019682	T005	Virus
C0206019	T047	Disease or Syndrome	C0079679	T005	Virus
C0206044	T047	Disease or Syndrome	C0006752	T005	Virus
C0206044	T047	Disease or Syndrome	C0206413	T005	Virus
C0206178	T047	Disease or Syndrome	C0019369	T005	Virus
C0206178	T047	Disease or Syndrome	C0205725	T005	Virus
C0206178	T047	Disease or Syndrome	C0206560	T005	Virus
C0206525	T047	Disease or Syndrome	C0026912	T007	Bacterium
C0206525	T047	Disease or Syndrome	C1032649	T007	Bacterium
C0206526	T047	Disease or Syndrome	C0026912	T007	Bacterium
C0206526	T047	Disease or Syndrome	C1032649	T007	Bacterium
C0206603	T047	Disease or Syndrome	C0206556	T005	Virus
C0206606	T047	Disease or Syndrome	C0042776	T005	Virus
C0206606	T047	Disease or Syndrome	C0206505	T005	Virus
C0206606	T047	Disease or Syndrome	C0206506	T005	Virus
C0206608	T047	Disease or Syndrome	C0016215	T005	Virus
C0206608	T047	Disease or Syndrome	C0040360	T005	Virus
C0206609	T047	Disease or Syndrome	C0003725	T005	Virus
C0206609	T047	Disease or Syndrome	C0042776	T005	Virus
C0206609	T047	Disease or Syndrome	C0206510	T005	Virus
C0206611	T047	Disease or Syndrome	C0003725	T005	Virus
C0206611	T047	Disease or Syndrome	C0031254	T005	Virus
C0206611	T047	Disease or Syndrome	C0040360	T005	Virus
C0206613	T047	Disease or Syndrome	C0318798	T005	Virus
C0206613	T047	Disease or Syndrome	C0030465	T005	Virus
C0206613	T047	Disease or Syndrome	C0042776	T005	Virus
C0206614	T047	Disease or Syndrome	C0030465	T005	Virus
C0206614	T047	Disease or Syndrome	C0206536	T005	Virus
C0206615	T047	Disease or Syndrome	C0206543	T005	Virus
C0206750	T047	Disease or Syndrome	C0206419	T005	Virus
C0206750	T047	Disease or Syndrome	C0010076	T005	Virus
C0206750	T047	Disease or Syndrome	C3697793	T005	Virus
C0206751	T047	Disease or Syndrome	C0035414	T005	Virus
C0206752	T047	Disease or Syndrome	C0002331	T005	Virus
C0206753	T047	Disease or Syndrome	C0040360	T005	Virus
C0206753	T047	Disease or Syndrome	C0206555	T005	Virus
C0220977	T047	Disease or Syndrome	C0319942	T004	Fungus
C0220977	T047	Disease or Syndrome	C0011746	T004	Fungus
C0220977	T047	Disease or Syndrome	C0016832	T004	Fungus
C0221200	T184	Sign or Symptom	C0025011	T005	Virus
C0221230	T047	Disease or Syndrome	C0004611	T007	Bacterium
C0221385	T047	Disease or Syndrome	C0004611	T007	Bacterium
C0221385	T047	Disease or Syndrome	C0040840	T007	Bacterium
C0234668	T033	Finding	C0040840	T007	Bacterium
C0235952	T047	Disease or Syndrome	C0079134	T007	Bacterium
C0237961	T047	Disease or Syndrome	C0004611	T007	Bacterium
C0237962	T047	Disease or Syndrome	C0004611	T007	Bacterium
C0238002	T047	Disease or Syndrome	C0004611	T007	Bacterium
C0238009	T047	Disease or Syndrome	C0004611	T007	Bacterium
C0238009	T047	Disease or Syndrome	C0027575	T007	Bacterium
C0238009	T047	Disease or Syndrome	C0314754	T007	Bacterium
C0238027	T047	Disease or Syndrome	C0009055	T007	Bacterium
C0238057	T047	Disease or Syndrome	C0004611	T007	Bacterium
C0238057	T047	Disease or Syndrome	C0040840	T007	Bacterium
C0238075	T047	Disease or Syndrome	C0004611	T007	Bacterium
C0238097	T047	Disease or Syndrome	C0010825	T005	Virus
C0238097	T047	Disease or Syndrome	C0019369	T005	Virus
C0238097	T047	Disease or Syndrome	C0042776	T005	Virus
C0238097	T047	Disease or Syndrome	C0205725	T005	Virus
C0238097	T047	Disease or Syndrome	C0206560	T005	Virus
C0238099	T047	Disease or Syndrome	C0035924	T005	Virus
C0238099	T047	Disease or Syndrome	C0042776	T005	Virus
C0238106	T047	Disease or Syndrome	C0079134	T007	Bacterium
C0238124	T047	Disease or Syndrome	C0004611	T007	Bacterium
C0238124	T047	Disease or Syndrome	C0038172	T007	Bacterium
C0238124	T047	Disease or Syndrome	C0038411	T007	Bacterium
C0238124	T047	Disease or Syndrome	C0318154	T007	Bacterium
C0238170	T047	Disease or Syndrome	C0011746	T004	Fungus
C0238170	T047	Disease or Syndrome	C0016832	T004	Fungus
C0238170	T047	Disease or Syndrome	C0319941	T004	Fungus
C0238212	T020	Acquired Abnormality	C0004611	T007	Bacterium
C0238316	T047	Disease or Syndrome	C0004611	T007	Bacterium
C0238334	T047	Disease or Syndrome	C0004611	T007	Bacterium
C0238345	T046	Pathologic Function	C0004611	T007	Bacterium
C0238404	T047	Disease or Syndrome	C0004611	T007	Bacterium
C0238418	T047	Disease or Syndrome	C0004611	T007	Bacterium
C0238419	T047	Disease or Syndrome	C0004611	T007	Bacterium
C0238434	T047	Disease or Syndrome	C0004611	T007	Bacterium
C0238446	T047	Disease or Syndrome	C0026912	T007	Bacterium
C0238446	T047	Disease or Syndrome	C0026926	T007	Bacterium
C0238446	T047	Disease or Syndrome	C1032649	T007	Bacterium
C0238447	T047	Disease or Syndrome	C0004611	T007	Bacterium
C0238528	T047	Disease or Syndrome	C0043406	T007	Bacterium
C0239075	T047	Disease or Syndrome	C0004611	T007	Bacterium
C0239075	T047	Disease or Syndrome	C0040840	T007	Bacterium
C0239295	T047	Disease or Syndrome	C0006836	T004	Fungus
C0239295	T047	Disease or Syndrome	C0011746	T004	Fungus
C0239636	T047	Disease or Syndrome	C0010156	T007	Bacterium
C0239636	T047	Disease or Syndrome	C0016880	T007	Bacterium
C0239810	T047	Disease or Syndrome	C0004611	T007	Bacterium
C0240555	T046	Pathologic Function	C0004611	T007	Bacterium
C0240608	T184	Sign or Symptom	C0004611	T007	Bacterium
C0241480	T047	Disease or Syndrome	C0004611	T007	Bacterium
C0241812	T047	Disease or Syndrome	C0038170	T007	Bacterium
C0241828	T047	Disease or Syndrome	C0004613	T007	Bacterium
C0241911	T047	Disease or Syndrome	C0042776	T005	Virus
C0241925	T047	Disease or Syndrome	C0004611	T007	Bacterium
C0241925	T047	Disease or Syndrome	C0040840	T007	Bacterium
C0241954	T047	Disease or Syndrome	C0004611	T007	Bacterium
C0241954	T047	Disease or Syndrome	C0023359	T007	Bacterium
C0242301	T047	Disease or Syndrome	C0004611	T007	Bacterium
C0242381	T047	Disease or Syndrome	C0004611	T007	Bacterium
C0242381	T047	Disease or Syndrome	C0006033	T007	Bacterium
C0242381	T047	Disease or Syndrome	C0006034	T007	Bacterium
C0242917	T047	Disease or Syndrome	C0085150	T005	Virus
C0242917	T047	Disease or Syndrome	C0206532	T005	Virus
C0242966	T047	Disease or Syndrome	C0004611	T007	Bacterium
C0242994	T047	Disease or Syndrome	C0019092	T005	Virus
C0242994	T047	Disease or Syndrome	C0086384	T005	Virus
C0243010	T047	Disease or Syndrome	C0042776	T005	Virus
C0243025	T047	Disease or Syndrome	C0019092	T005	Virus
C0259737	T047	Disease or Syndrome	C0008724	T004	Fungus
C0259737	T047	Disease or Syndrome	C0011746	T004	Fungus
C0259737	T047	Disease or Syndrome	C0016832	T004	Fungus
C0259800	T047	Disease or Syndrome	C0004611	T007	Bacterium
C0262380	T047	Disease or Syndrome	C0004611	T007	Bacterium
C0262505	T033	Finding	C0019169	T005	Virus
C0262666	T047	Disease or Syndrome	C0004611	T007	Bacterium
C0263006	T047	Disease or Syndrome	C0004611	T007	Bacterium
C0263018	T047	Disease or Syndrome	C0004611	T007	Bacterium
C0263019	T047	Disease or Syndrome	C0004611	T007	Bacterium
C0263020	T047	Disease or Syndrome	C0004611	T007	Bacterium
C0263021	T047	Disease or Syndrome	C0004611	T007	Bacterium
C0263022	T047	Disease or Syndrome	C0004611	T007	Bacterium
C0263023	T047	Disease or Syndrome	C0004611	T007	Bacterium
C0263024	T047	Disease or Syndrome	C0004611	T007	Bacterium
C0263025	T047	Disease or Syndrome	C0004611	T007	Bacterium
C0263026	T047	Disease or Syndrome	C0004611	T007	Bacterium
C0263027	T047	Disease or Syndrome	C0004611	T007	Bacterium
C0263028	T047	Disease or Syndrome	C0004611	T007	Bacterium
C0263029	T047	Disease or Syndrome	C0004611	T007	Bacterium
C0263030	T047	Disease or Syndrome	C0004611	T007	Bacterium
C0263031	T047	Disease or Syndrome	C0004611	T007	Bacterium
C0263032	T047	Disease or Syndrome	C0004611	T007	Bacterium
C0263033	T047	Disease or Syndrome	C0004611	T007	Bacterium
C0263034	T047	Disease or Syndrome	C0004611	T007	Bacterium
C0263035	T047	Disease or Syndrome	C0004611	T007	Bacterium
C0263036	T047	Disease or Syndrome	C0004611	T007	Bacterium
C0263037	T047	Disease or Syndrome	C0004611	T007	Bacterium
C0263038	T047	Disease or Syndrome	C0004611	T007	Bacterium
C0263039	T047	Disease or Syndrome	C0004611	T007	Bacterium
C0263040	T047	Disease or Syndrome	C0004611	T007	Bacterium
C0263041	T047	Disease or Syndrome	C0004611	T007	Bacterium
C0263042	T047	Disease or Syndrome	C0004611	T007	Bacterium
C0263043	T047	Disease or Syndrome	C0004611	T007	Bacterium
C0263044	T047	Disease or Syndrome	C0004611	T007	Bacterium
C0263045	T047	Disease or Syndrome	C0004611	T007	Bacterium
C0263046	T047	Disease or Syndrome	C0004611	T007	Bacterium
C0263047	T047	Disease or Syndrome	C0004611	T007	Bacterium
C0263048	T047	Disease or Syndrome	C0004611	T007	Bacterium
C0263049	T047	Disease or Syndrome	C0004611	T007	Bacterium
C0263050	T047	Disease or Syndrome	C0004611	T007	Bacterium
C0263051	T047	Disease or Syndrome	C0004611	T007	Bacterium
C0263052	T047	Disease or Syndrome	C0004611	T007	Bacterium
C0263053	T047	Disease or Syndrome	C0004611	T007	Bacterium
C0263054	T047	Disease or Syndrome	C0004611	T007	Bacterium
C0263056	T047	Disease or Syndrome	C0004611	T007	Bacterium
C0263057	T047	Disease or Syndrome	C0004611	T007	Bacterium
C0263058	T047	Disease or Syndrome	C0004611	T007	Bacterium
C0263059	T047	Disease or Syndrome	C0004611	T007	Bacterium
C0263060	T047	Disease or Syndrome	C0004611	T007	Bacterium
C0263061	T047	Disease or Syndrome	C0004611	T007	Bacterium
C0263062	T047	Disease or Syndrome	C0004611	T007	Bacterium
C0263063	T047	Disease or Syndrome	C0004611	T007	Bacterium
C0263064	T047	Disease or Syndrome	C0004611	T007	Bacterium
C0263065	T047	Disease or Syndrome	C0004611	T007	Bacterium
C0263066	T047	Disease or Syndrome	C0004611	T007	Bacterium
C0263067	T047	Disease or Syndrome	C0004611	T007	Bacterium
C0263068	T047	Disease or Syndrome	C0004611	T007	Bacterium
C0263069	T047	Disease or Syndrome	C0004611	T007	Bacterium
C0263070	T047	Disease or Syndrome	C0004611	T007	Bacterium
C0263071	T047	Disease or Syndrome	C0004611	T007	Bacterium
C0263072	T047	Disease or Syndrome	C0004611	T007	Bacterium
C0263073	T047	Disease or Syndrome	C0004611	T007	Bacterium
C0263074	T047	Disease or Syndrome	C0004611	T007	Bacterium
C0263075	T047	Disease or Syndrome	C0004611	T007	Bacterium
C0263076	T047	Disease or Syndrome	C0004611	T007	Bacterium
C0263077	T047	Disease or Syndrome	C0004611	T007	Bacterium
C0263078	T047	Disease or Syndrome	C0004611	T007	Bacterium
C0263079	T047	Disease or Syndrome	C0004611	T007	Bacterium
C0263080	T047	Disease or Syndrome	C0004611	T007	Bacterium
C0263081	T046	Pathologic Function	C0004611	T007	Bacterium
C0263082	T047	Disease or Syndrome	C0004611	T007	Bacterium
C0263083	T047	Disease or Syndrome	C0004611	T007	Bacterium
C0263084	T047	Disease or Syndrome	C0004611	T007	Bacterium
C0263085	T047	Disease or Syndrome	C0004611	T007	Bacterium
C0263086	T047	Disease or Syndrome	C0004611	T007	Bacterium
C0263087	T047	Disease or Syndrome	C0004611	T007	Bacterium
C0263088	T047	Disease or Syndrome	C0004611	T007	Bacterium
C0263089	T047	Disease or Syndrome	C0004611	T007	Bacterium
C0263090	T047	Disease or Syndrome	C0004611	T007	Bacterium
C0263091	T047	Disease or Syndrome	C0004611	T007	Bacterium
C0263092	T047	Disease or Syndrome	C0004611	T007	Bacterium
C0263094	T047	Disease or Syndrome	C0004611	T007	Bacterium
C0263095	T047	Disease or Syndrome	C0004611	T007	Bacterium
C0263096	T047	Disease or Syndrome	C0016880	T007	Bacterium
C0263096	T047	Disease or Syndrome	C0004611	T007	Bacterium
C0263097	T047	Disease or Syndrome	C0004611	T007	Bacterium
C0263098	T047	Disease or Syndrome	C0004611	T007	Bacterium
C0263099	T047	Disease or Syndrome	C0004611	T007	Bacterium
C0263100	T047	Disease or Syndrome	C0004611	T007	Bacterium
C0263101	T047	Disease or Syndrome	C0004611	T007	Bacterium
C0263102	T047	Disease or Syndrome	C0004611	T007	Bacterium
C0263103	T047	Disease or Syndrome	C0004611	T007	Bacterium
C0263105	T047	Disease or Syndrome	C0004611	T007	Bacterium
C0263106	T047	Disease or Syndrome	C0004611	T007	Bacterium
C0263107	T047	Disease or Syndrome	C0004611	T007	Bacterium
C0263108	T047	Disease or Syndrome	C0004611	T007	Bacterium
C0263109	T047	Disease or Syndrome	C0004611	T007	Bacterium
C0263110	T047	Disease or Syndrome	C0004611	T007	Bacterium
C0263111	T046	Pathologic Function	C0004611	T007	Bacterium
C0263112	T047	Disease or Syndrome	C0004611	T007	Bacterium
C0263113	T047	Disease or Syndrome	C0004611	T007	Bacterium
C0263114	T047	Disease or Syndrome	C0004611	T007	Bacterium
C0263115	T047	Disease or Syndrome	C0004611	T007	Bacterium
C0263116	T047	Disease or Syndrome	C0004611	T007	Bacterium
C0263117	T047	Disease or Syndrome	C0004611	T007	Bacterium
C0263118	T047	Disease or Syndrome	C0004611	T007	Bacterium
C0263119	T047	Disease or Syndrome	C0004611	T007	Bacterium
C0263120	T047	Disease or Syndrome	C0004611	T007	Bacterium
C0263121	T047	Disease or Syndrome	C0004611	T007	Bacterium
C0263122	T047	Disease or Syndrome	C0004611	T007	Bacterium
C0263123	T047	Disease or Syndrome	C0004611	T007	Bacterium
C0263124	T047	Disease or Syndrome	C0004611	T007	Bacterium
C0263125	T047	Disease or Syndrome	C0004611	T007	Bacterium
C0263127	T047	Disease or Syndrome	C0004611	T007	Bacterium
C0263129	T047	Disease or Syndrome	C0004611	T007	Bacterium
C0263130	T047	Disease or Syndrome	C0004611	T007	Bacterium
C0263135	T047	Disease or Syndrome	C0006837	T004	Fungus
C0263135	T047	Disease or Syndrome	C0033809	T007	Bacterium
C0263159	T047	Disease or Syndrome	C0004611	T007	Bacterium
C0263164	T047	Disease or Syndrome	C0004611	T007	Bacterium
C0263210	T047	Disease or Syndrome	C0004611	T007	Bacterium
C0263211	T047	Disease or Syndrome	C0004611	T007	Bacterium
C0263212	T047	Disease or Syndrome	C0004611	T007	Bacterium
C0263213	T047	Disease or Syndrome	C0004611	T007	Bacterium
C0263372	T047	Disease or Syndrome	C0042776	T005	Virus
C0263387	T047	Disease or Syndrome	C0004611	T007	Bacterium
C0263387	T047	Disease or Syndrome	C0010148	T007	Bacterium
C0263387	T047	Disease or Syndrome	C0011635	T004	Fungus
C0263421	T047	Disease or Syndrome	C0004611	T007	Bacterium
C0263421	T047	Disease or Syndrome	C0006033	T007	Bacterium
C0263421	T047	Disease or Syndrome	C0006034	T007	Bacterium
C0263506	T047	Disease or Syndrome	C0004611	T007	Bacterium
C0263508	T047	Disease or Syndrome	C0004611	T007	Bacterium
C0263556	T047	Disease or Syndrome	C0004611	T007	Bacterium
C0263681	T047	Disease or Syndrome	C0004611	T007	Bacterium
C0263682	T047	Disease or Syndrome	C0004611	T007	Bacterium
C0263683	T047	Disease or Syndrome	C0004611	T007	Bacterium
C0263684	T047	Disease or Syndrome	C0004611	T007	Bacterium
C0263686	T047	Disease or Syndrome	C0004611	T007	Bacterium
C0263687	T047	Disease or Syndrome	C0004611	T007	Bacterium
C0263688	T047	Disease or Syndrome	C0004611	T007	Bacterium
[truncated: 7,821 more rows]
