# Supplementary material for: Semantic Modeling for Exposomics with Exploratory Evaluation in Clinical Context
Source: J Healthc Eng. 2017 Aug 30;2017:3818302. doi: 10.1155/2017/3818302 (PMC5603127; doi:10.1155/2017/3818302)
Supplement: Supplementary file 3 [file 3818302.f3.xlsx]

## Sheet: expo_joint_distribution.tsv
Section	Semantic type	# annotations
HOSPITAL COURSE	T109:Organic Chemical	152
HOSPITAL COURSE	T121:Pharmacologic Substance	141
HOSPITAL COURSE	T060:Diagnostic Procedure	101
HOSPITAL COURSE	T061:Therapeutic or Preventive Procedure	80
HOSPITAL COURSE	T195:Antibiotic	45
HOSPITAL COURSE	T074:Medical Device	27
HOSPITAL COURSE	T116:Amino Acid, Peptide, or Protein	14
HOSPITAL COURSE	T047:Disease or Syndrome	13
HOSPITAL COURSE	T007:Bacterium	10
HOSPITAL COURSE	T125:Hormone	6
HOSPITAL COURSE	T197:Inorganic Chemical	5
HOSPITAL COURSE	T123:Biologically Active Substance	4
HOSPITAL COURSE	T058:Health Care Activity	4
HOSPITAL COURSE	T200:Clinical Drug	2
HOSPITAL COURSE	T131:Hazardous or Poisonous Substance	2
HOSPITAL COURSE	T196:Element, Ion, or Isotope	2
HOSPITAL COURSE	T114:Nucleic Acid, Nucleoside, or Nucleotide	2
HOSPITAL COURSE	T167:Substance	2
HOSPITAL COURSE	T031:Body Substance	1
HOSPITAL COURSE	T020:Acquired Abnormality	1
HOSPITAL COURSE	T129:Immunologic Factor	1
HOSPITAL COURSE	T122:Biomedical or Dental Material	1
HOSPITAL COURSE	T059:Laboratory Procedure	1
HISTORY OF PRESENT ILLNESS	T121:Pharmacologic Substance	101
HISTORY OF PRESENT ILLNESS	T109:Organic Chemical	95
HISTORY OF PRESENT ILLNESS	T060:Diagnostic Procedure	61
HISTORY OF PRESENT ILLNESS	T061:Therapeutic or Preventive Procedure	60
HISTORY OF PRESENT ILLNESS	T195:Antibiotic	18
HISTORY OF PRESENT ILLNESS	T074:Medical Device	13
HISTORY OF PRESENT ILLNESS	T116:Amino Acid, Peptide, or Protein	11
HISTORY OF PRESENT ILLNESS	T047:Disease or Syndrome	8
HISTORY OF PRESENT ILLNESS	T129:Immunologic Factor	6
HISTORY OF PRESENT ILLNESS	T114:Nucleic Acid, Nucleoside, or Nucleotide	6
HISTORY OF PRESENT ILLNESS	T197:Inorganic Chemical	5
HISTORY OF PRESENT ILLNESS	T125:Hormone	4
HISTORY OF PRESENT ILLNESS	T048:Mental or Behavioral Dysfunction	3
HISTORY OF PRESENT ILLNESS	T037:Injury or Poisoning	3
HISTORY OF PRESENT ILLNESS	T127:Vitamin	3
HISTORY OF PRESENT ILLNESS	T033:Finding	3
HISTORY OF PRESENT ILLNESS	T056:Daily or Recreational Activity	3
HISTORY OF PRESENT ILLNESS	T200:Clinical Drug	3
HISTORY OF PRESENT ILLNESS	T168:Food	2
HISTORY OF PRESENT ILLNESS	T007:Bacterium	2
HISTORY OF PRESENT ILLNESS	T005:Virus	2
HISTORY OF PRESENT ILLNESS	T167:Substance	1
HISTORY OF PRESENT ILLNESS	T130:Indicator, Reagent, or Diagnostic Aid	1
HISTORY OF PRESENT ILLNESS	T123:Biologically Active Substance	1
HISTORY OF PRESENT ILLNESS	T058:Health Care Activity	1
HISTORY OF PRESENT ILLNESS	T097:Professional or Occupational Group	1
HISTORY OF PRESENT ILLNESS	T055:Individual Behavior	1
DISCHARGE MEDICATIONS	T121:Pharmacologic Substance	151
DISCHARGE MEDICATIONS	T109:Organic Chemical	147
DISCHARGE MEDICATIONS	T200:Clinical Drug	11
DISCHARGE MEDICATIONS	T195:Antibiotic	8
DISCHARGE MEDICATIONS	T197:Inorganic Chemical	6
DISCHARGE MEDICATIONS	T127:Vitamin	6
DISCHARGE MEDICATIONS	T125:Hormone	5
DISCHARGE MEDICATIONS	T116:Amino Acid, Peptide, or Protein	4
DISCHARGE MEDICATIONS	T061:Therapeutic or Preventive Procedure	2
DISCHARGE MEDICATIONS	T130:Indicator, Reagent, or Diagnostic Aid	1
DISCHARGE MEDICATIONS	T196:Element, Ion, or Isotope	1
DISCHARGE MEDICATIONS	T168:Food	1
DISCHARGE MEDICATIONS	T114:Nucleic Acid, Nucleoside, or Nucleotide	1
MEDICATIONS ON ADMISSION	T121:Pharmacologic Substance	147
MEDICATIONS ON ADMISSION	T109:Organic Chemical	131
MEDICATIONS ON ADMISSION	T116:Amino Acid, Peptide, or Protein	13
MEDICATIONS ON ADMISSION	T125:Hormone	6
MEDICATIONS ON ADMISSION	T127:Vitamin	6
MEDICATIONS ON ADMISSION	T195:Antibiotic	5
MEDICATIONS ON ADMISSION	T197:Inorganic Chemical	5
MEDICATIONS ON ADMISSION	T200:Clinical Drug	5
MEDICATIONS ON ADMISSION	T114:Nucleic Acid, Nucleoside, or Nucleotide	1
MEDICATIONS ON ADMISSION	T129:Immunologic Factor	1
MEDICATIONS ON ADMISSION	T122:Biomedical or Dental Material	1
MEDICATIONS ON DISCHARGE	T121:Pharmacologic Substance	142
MEDICATIONS ON DISCHARGE	T109:Organic Chemical	120
MEDICATIONS ON DISCHARGE	T116:Amino Acid, Peptide, or Protein	11
MEDICATIONS ON DISCHARGE	T197:Inorganic Chemical	11
MEDICATIONS ON DISCHARGE	T127:Vitamin	6
MEDICATIONS ON DISCHARGE	T125:Hormone	6
MEDICATIONS ON DISCHARGE	T195:Antibiotic	4
MEDICATIONS ON DISCHARGE	T061:Therapeutic or Preventive Procedure	3
MEDICATIONS ON DISCHARGE	T200:Clinical Drug	3
MEDICATIONS ON DISCHARGE	T074:Medical Device	2
MEDICATIONS ON DISCHARGE	T123:Biologically Active Substance	1
MEDICATIONS	T121:Pharmacologic Substance	83
MEDICATIONS	T109:Organic Chemical	72
MEDICATIONS	T116:Amino Acid, Peptide, or Protein	8
MEDICATIONS	T200:Clinical Drug	3
MEDICATIONS	T127:Vitamin	3
MEDICATIONS	T125:Hormone	3
MEDICATIONS	T197:Inorganic Chemical	2
MEDICATIONS	T168:Food	2
MEDICATIONS	T061:Therapeutic or Preventive Procedure	1
MEDICATIONS	T123:Biologically Active Substance	1
PAST MEDICAL HISTORY	T061:Therapeutic or Preventive Procedure	47
PAST MEDICAL HISTORY	T121:Pharmacologic Substance	11
PAST MEDICAL HISTORY	T109:Organic Chemical	10
PAST MEDICAL HISTORY	T047:Disease or Syndrome	7
PAST MEDICAL HISTORY	T060:Diagnostic Procedure	4
PAST MEDICAL HISTORY	T033:Finding	2
PAST MEDICAL HISTORY	T007:Bacterium	2
PAST MEDICAL HISTORY	T037:Injury or Poisoning	1
PAST MEDICAL HISTORY	T116:Amino Acid, Peptide, or Protein	1
PAST MEDICAL HISTORY	T196:Element, Ion, or Isotope	1
PAST MEDICAL HISTORY	T195:Antibiotic	1
PAST MEDICAL HISTORY	T125:Hormone	1
PAST MEDICAL HISTORY	T058:Health Care Activity	1
SOCIAL HISTORY	T033:Finding	38
SOCIAL HISTORY	T055:Individual Behavior	21
SOCIAL HISTORY	T097:Professional or Occupational Group	13
SOCIAL HISTORY	T168:Food	3
SOCIAL HISTORY	T054:Social Behavior	3
SOCIAL HISTORY	T048:Mental or Behavioral Dysfunction	2
SOCIAL HISTORY	T068:Human-caused Phenomenon or Process	1
SOCIAL HISTORY	T129:Immunologic Factor	1
SOCIAL HISTORY	T130:Indicator, Reagent, or Diagnostic Aid	1
SOCIAL HISTORY	T056:Daily or Recreational Activity	1
SOCIAL HISTORY	T116:Amino Acid, Peptide, or Protein	1
SOCIAL HISTORY	T074:Medical Device	1
SOCIAL HISTORY	T073:Manufactured Object	1
ALLERGIES	T109:Organic Chemical	21
ALLERGIES	T121:Pharmacologic Substance	15
ALLERGIES	T195:Antibiotic	8
ALLERGIES	T196:Element, Ion, or Isotope	1
ALLERGIES	T130:Indicator, Reagent, or Diagnostic Aid	1
ALLERGIES	T114:Nucleic Acid, Nucleoside, or Nucleotide	1
MEDICATIONS ON TRANSFER	T121:Pharmacologic Substance	19
MEDICATIONS ON TRANSFER	T109:Organic Chemical	17
MEDICATIONS ON TRANSFER	T125:Hormone	2
MEDICATIONS ON TRANSFER	T127:Vitamin	2
MEDICATIONS ON TRANSFER	T197:Inorganic Chemical	2
MEDICATIONS ON TRANSFER	T200:Clinical Drug	1
MEDICATIONS ON TRANSFER	T061:Therapeutic or Preventive Procedure	1
MEDICATIONS ON TRANSFER	T116:Amino Acid, Peptide, or Protein	1
HOSPITAL COURSE BY SYSTEM	T109:Organic Chemical	10
HOSPITAL COURSE BY SYSTEM	T121:Pharmacologic Substance	8
HOSPITAL COURSE BY SYSTEM	T060:Diagnostic Procedure	6
HOSPITAL COURSE BY SYSTEM	T195:Antibiotic	5
HOSPITAL COURSE BY SYSTEM	T196:Element, Ion, or Isotope	2
HOSPITAL COURSE BY SYSTEM	T116:Amino Acid, Peptide, or Protein	2
HOSPITAL COURSE BY SYSTEM	T129:Immunologic Factor	2
HOSPITAL COURSE BY SYSTEM	T130:Indicator, Reagent, or Diagnostic Aid	2
HOSPITAL COURSE BY SYSTEM	T059:Laboratory Procedure	1
HOSPITAL COURSE BY SYSTEM	T125:Hormone	1
HOSPITAL COURSE BY SYSTEM	T061:Therapeutic or Preventive Procedure	1
ADMISSION MEDICATIONS	T121:Pharmacologic Substance	20
ADMISSION MEDICATIONS	T109:Organic Chemical	18
ADMISSION MEDICATIONS	T114:Nucleic Acid, Nucleoside, or Nucleotide	1
ADMISSION MEDICATIONS	T127:Vitamin	1
RELEVANT LABORATORY DATA	T121:Pharmacologic Substance	12
RELEVANT LABORATORY DATA	T109:Organic Chemical	11
RELEVANT LABORATORY DATA	T060:Diagnostic Procedure	6
RELEVANT LABORATORY DATA	T061:Therapeutic or Preventive Procedure	4
RELEVANT LABORATORY DATA	T131:Hazardous or Poisonous Substance	2
RELEVANT LABORATORY DATA	T074:Medical Device	2
RELEVANT LABORATORY DATA	T058:Health Care Activity	1
LABORATORY DATA	T060:Diagnostic Procedure	29
LABORATORY DATA	T109:Organic Chemical	3
LABORATORY DATA	T121:Pharmacologic Substance	2
LABORATORY DATA	T037:Injury or Poisoning	1
LABORATORY DATA	T195:Antibiotic	1
HOSPITAL COURSE AND TREATMENT	T061:Therapeutic or Preventive Procedure	9
HOSPITAL COURSE AND TREATMENT	T121:Pharmacologic Substance	8
HOSPITAL COURSE AND TREATMENT	T109:Organic Chemical	7
HOSPITAL COURSE AND TREATMENT	T037:Injury or Poisoning	3
HOSPITAL COURSE AND TREATMENT	T060:Diagnostic Procedure	3
HOSPITAL COURSE AND TREATMENT	T195:Antibiotic	2
HOSPITAL COURSE AND TREATMENT	T123:Biologically Active Substance	1
HOSPITAL COURSE AND TREATMENT	T074:Medical Device	1
HOSPITAL COURSE AND TREATMENT	T196:Element, Ion, or Isotope	1
HOSPITALIZATION COURSE	T121:Pharmacologic Substance	10
HOSPITALIZATION COURSE	T109:Organic Chemical	7
HOSPITALIZATION COURSE	T060:Diagnostic Procedure	4
HOSPITALIZATION COURSE	T116:Amino Acid, Peptide, or Protein	2
HOSPITALIZATION COURSE	T061:Therapeutic or Preventive Procedure	2
HOSPITALIZATION COURSE	T129:Immunologic Factor	2
HOSPITALIZATION COURSE	T114:Nucleic Acid, Nucleoside, or Nucleotide	1
HOSPITALIZATION COURSE	T004:Fungus	1
PHYSICAL EXAMINATION	T074:Medical Device	7
PHYSICAL EXAMINATION	T061:Therapeutic or Preventive Procedure	6
PHYSICAL EXAMINATION	T060:Diagnostic Procedure	3
PHYSICAL EXAMINATION	T196:Element, Ion, or Isotope	1
PHYSICAL EXAMINATION	T047:Disease or Syndrome	1
PHYSICAL EXAMINATION	T033:Finding	1
PHYSICAL EXAMINATION	T020:Acquired Abnormality	1
PHYSICAL EXAMINATION	T121:Pharmacologic Substance	1
PHYSICAL EXAMINATION	T037:Injury or Poisoning	1
PAST SURGICAL HISTORY	T061:Therapeutic or Preventive Procedure	22
IDENTIFYING DATA	T109:Organic Chemical	4
IDENTIFYING DATA	T121:Pharmacologic Substance	4
IDENTIFYING DATA	T061:Therapeutic or Preventive Procedure	4
IDENTIFYING DATA	T058:Health Care Activity	3
IDENTIFYING DATA	T060:Diagnostic Procedure	2
IDENTIFYING DATA	T033:Finding	1
IDENTIFYING DATA	T196:Element, Ion, or Isotope	1
DISCHARGE INSTRUCTIONS	T109:Organic Chemical	9
DISCHARGE INSTRUCTIONS	T121:Pharmacologic Substance	6
DISCHARGE INSTRUCTIONS	T195:Antibiotic	3
OPERATIONS / PROCEDURES	T060:Diagnostic Procedure	6
OPERATIONS / PROCEDURES	T121:Pharmacologic Substance	4
OPERATIONS / PROCEDURES	T109:Organic Chemical	3
OPERATIONS / PROCEDURES	T061:Therapeutic or Preventive Procedure	2
OPERATIONS / PROCEDURES	T116:Amino Acid, Peptide, or Protein	1
OPERATIONS / PROCEDURES	T125:Hormone	1
OPERATIONS / PROCEDURES	T074:Medical Device	1
PRINCIPAL PROCEDURE	T061:Therapeutic or Preventive Procedure	10
PRINCIPAL PROCEDURE	T060:Diagnostic Procedure	7
HISTORY AND REASON FOR HOSPITALIZATION	T060:Diagnostic Procedure	4
HISTORY AND REASON FOR HOSPITALIZATION	T121:Pharmacologic Substance	4
HISTORY AND REASON FOR HOSPITALIZATION	T061:Therapeutic or Preventive Procedure	3
HISTORY AND REASON FOR HOSPITALIZATION	T197:Inorganic Chemical	2
HISTORY AND REASON FOR HOSPITALIZATION	T116:Amino Acid, Peptide, or Protein	1
HISTORY AND REASON FOR HOSPITALIZATION	T129:Immunologic Factor	1
HISTORY AND REASON FOR HOSPITALIZATION	T109:Organic Chemical	1
DISPOSITION	T109:Organic Chemical	6
DISPOSITION	T121:Pharmacologic Substance	5
DISPOSITION	T059:Laboratory Procedure	1
DISPOSITION	T195:Antibiotic	1
DISPOSITION	T125:Hormone	1
LABORATORY	T060:Diagnostic Procedure	8
LABORATORY	T058:Health Care Activity	1
LABORATORY	T109:Organic Chemical	1
LABORATORY	T074:Medical Device	1
LABORATORY	T121:Pharmacologic Substance	1
LABORATORY	T007:Bacterium	1
COMPLICATIONS	T121:Pharmacologic Substance	5
COMPLICATIONS	T109:Organic Chemical	4
COMPLICATIONS	T060:Diagnostic Procedure	2
COMPLICATIONS	T074:Medical Device	1
MEDICATIONS ON ADMIT	T121:Pharmacologic Substance	5
MEDICATIONS ON ADMIT	T109:Organic Chemical	5
MEDICATIONS PRIOR TO ADMISSION	T121:Pharmacologic Substance	5
MEDICATIONS PRIOR TO ADMISSION	T109:Organic Chemical	4
MEDICATIONS PRIOR TO ADMISSION	T116:Amino Acid, Peptide, or Protein	1
ADDITIONAL COMMENTS	T109:Organic Chemical	3
ADDITIONAL COMMENTS	T121:Pharmacologic Substance	2
ADDITIONAL COMMENTS	T195:Antibiotic	2
ADDITIONAL COMMENTS	T074:Medical Device	1
ADDITIONAL COMMENTS	T061:Therapeutic or Preventive Procedure	1
OPERATIONS AND PROCEDURES	T061:Therapeutic or Preventive Procedure	5
OPERATIONS AND PROCEDURES	T037:Injury or Poisoning	1
OPERATIONS AND PROCEDURES	T074:Medical Device	1
BRIEF HISTORY	T061:Therapeutic or Preventive Procedure	2
BRIEF HISTORY	T121:Pharmacologic Substance	1
BRIEF HISTORY	T020:Acquired Abnormality	1
BRIEF HISTORY	T109:Organic Chemical	1
BRIEF HISTORY	T122:Biomedical or Dental Material	1
DISPOSITION AND DISCHARGE MEDICATIONS	T121:Pharmacologic Substance	3
DISPOSITION AND DISCHARGE MEDICATIONS	T109:Organic Chemical	3
LABORATORY EXAMINATION	T060:Diagnostic Procedure	5
ASSOCIATED PROCEDURES	T060:Diagnostic Procedure	5
CURRENT MEDICATIONS	T121:Pharmacologic Substance	2
CURRENT MEDICATIONS	T109:Organic Chemical	2
CURRENT MEDICATIONS	T195:Antibiotic	1
DISCHARGE DIAGNOSIS	T109:Organic Chemical	2
DISCHARGE DIAGNOSIS	T121:Pharmacologic Substance	2
DISCHARGE DIAGNOSIS	T195:Antibiotic	1
DISCHARGE ORDERS	T121:Pharmacologic Substance	3
DISCHARGE ORDERS	T109:Organic Chemical	2
SPECIAL PROCEDURES AND OPERATIONS	T061:Therapeutic or Preventive Procedure	3
SPECIAL PROCEDURES AND OPERATIONS	T060:Diagnostic Procedure	1
LABORATORY AND RADIOLOGIC DATA	T060:Diagnostic Procedure	2
LABORATORY AND RADIOLOGIC DATA	T121:Pharmacologic Substance	1
LABORATORY AND RADIOLOGIC DATA	T109:Organic Chemical	1
REVIEW OF SYSTEMS	T121:Pharmacologic Substance	1
REVIEW OF SYSTEMS	T056:Daily or Recreational Activity	1
REVIEW OF SYSTEMS	T116:Amino Acid, Peptide, or Protein	1
REVIEW OF SYSTEMS	T054:Social Behavior	1
Imaging studies	T060:Diagnostic Procedure	4
LABS	T058:Health Care Activity	1
LABS	T060:Diagnostic Procedure	1
LABS	T061:Therapeutic or Preventive Procedure	1
DOCTOR 'S DISCHARGE ORDERS	T121:Pharmacologic Substance	1
DOCTOR 'S DISCHARGE ORDERS	T109:Organic Chemical	1
DOCTOR 'S DISCHARGE ORDERS	T074:Medical Device	1
HABITS	T055:Individual Behavior	1
HABITS	T033:Finding	1
PASTY GYN HISTORY	T060:Diagnostic Procedure	1
PASTY GYN HISTORY	T200:Clinical Drug	1
ADMISSION STUDIES	T060:Diagnostic Procedure	2
PRINCIPAL DIAGNOSIS	T037:Injury or Poisoning	2
IDENTIFICATION	T061:Therapeutic or Preventive Procedure	1
IDENTIFICATION	T060:Diagnostic Procedure	1
PHYSICAL EXAMINATION AT TIME OF ADMISSION	T109:Organic Chemical	1
PHYSICAL EXAMINATION AT TIME OF ADMISSION	T121:Pharmacologic Substance	1
LABORATORY DATA ON ADMISSION	T060:Diagnostic Procedure	2
HISTORY OF THE PRESENT ILLNESS	T061:Therapeutic or Preventive Procedure	2
RADIOLOGIC STUDIES	T060:Diagnostic Procedure	2
PREVIOUS HISTORY	T061:Therapeutic or Preventive Procedure	2
PHYSICAL EXAM	T074:Medical Device	2
LABORATORY DATA UPON ADMISSION	T060:Diagnostic Procedure	2
CHIEF COMPLAINT	T074:Medical Device	2
ASSESSMENT / PLAN	T061:Therapeutic or Preventive Procedure	1
PREOPERATIVE STATUS	T060:Diagnostic Procedure	1
PHYSICAL EXAMINATION ON ADMISSION	T061:Therapeutic or Preventive Procedure	1
ASSOCIATED DIAGNOSIS	T047:Disease or Syndrome	1
OTHER PROCEDURES	T061:Therapeutic or Preventive Procedure	1
SIGNIFICANT PROBLEMS	T061:Therapeutic or Preventive Procedure	1
RADIOLOGY	T060:Diagnostic Procedure	1
PREOPERATIVE CARDIAC STATUS	T074:Medical Device	1
DIAGNOSTIC STUDIES	T060:Diagnostic Procedure	1
PROBLEM LIST	T061:Therapeutic or Preventive Procedure	1
PRINCIPAL DIAGNOSES	T061:Therapeutic or Preventive Procedure	1
ASSOCIATED DIAGNOSES	T020:Acquired Abnormality	1
PAST GYN HISTORY	T060:Diagnostic Procedure	1
PROBLEMS	T033:Finding	1
PRINCIPLE PROCEDURE	T061:Therapeutic or Preventive Procedure	1
CARDIAC RISK FACTORS	T055:Individual Behavior	1
